# Supplementary material for: Mitotic Spindle Proteomics in Chinese Hamster Ovary Cells
Source: PLoS One. 2011 May 27;6(5):e20489. doi: 10.1371/journal.pone.0020489 (PMC3103581; doi:10.1371/journal.pone.0020489)
Supplement: Table S1 — The CHO cell metaphase spindle proteome. IPI accession numbers are found in column A. Numbers in m13, m14, 15 m, and m19 columns represent peptide hits in individual mass spec runs. The status column represents in which mass spec runs each protein was found, and the occurrence column states whether a protein was found in 3 or 4 out of 4 mass spec runs. In column H, protein descriptive names and taxa are reported. Corresponding gene symbols are listed in the gene symbol column with semicolons separating indistinguishable proteins, and the MGD/RGD/HGNC approved names are reported in column J. Pseudogenes are denoted with an asterisk in column K, if the row contains only pseudogene(s). Redundancy is present in this table. (XLSX) [file pone.0020489.s001.xlsx]

## Sheet: Supporting Table S1
Bonner et al.
Raw Data for CHO Metaphase Mitotic Spindle Proteome
Total Number=1341 Proteins
Supporting Information: Table S1
Supporting Table S1 contains the raw data for the CHO cell metaphase spindle proteome. IPI accession numbers are found in column A.
Numbers in m13, m14, 15m, and m19 columns represent peptide hits in individual mass spec runs. The status column represents
which mass spec runs each protein was found, and the occurrence column states if a protein was found in 3 or 4 or 4 out of 4 mass
spec runs. In column H, protein descriptive names and taxa are reported. Corresponding gene symbols are listed in the gene symbol
column with semicolons separating indistinguishable proteins, and the MGD/RGD/HGNC approved names are reported in column J.
Pseudogenes are denoted with an asterisk in column K if a row is only peusodogene(s).
Accession	m13	am14	bm15	m19	Status	Occurrence	Descriptive Name (Tax_Id - Gene Symbol)	Gene Symbol	MGD/RGD/HGNC approved name	Pseudogene?
IPI00117687.1	4	4	3	1	1_1_1_1_	4	10090 - 0610009D07Rik Pre-mRNA branch site protein p14	0610009D07Rik	RIKEN cDNA 0610009D07 gene
IPI00459632.4	5	0	4	3	1_0_1_1_	3	10090 - 1190005F20Rik Isoform 1 of TRM1-like protein	1190005F20Rik	RIKEN cDNA 1190005F20 gene
IPI00283671.4	0	3	3	2	0_1_1_1_	3	10090 - 2500003M10Rik Isoform 1 of Uncharacterized protein C1orf77 homolog	2500003M10Rik	RIKEN cDNA 2500003M10 gene
IPI00553266.3	6	3	2	3	1_1_1_1_	4	10090 - 2510012J08Rik Uncharacterized protein C19orf29 homolog	2510012J08Rik	RIKEN cDNA 2510012J08 gene
IPI00457960.4	2	0	1	1	1_0_1_1_	3	10090 - 4831426I19Rik Isoform 1 of Nesprin-3	4831426I19Rik	RIKEN cDNA 4831426I19 gene
IPI00225214.2	1	2	1	0	1_1_1_0_	3	10090 - AA408296 Digestive organ expansion factor homolog	AA408296	expressed sequence AA408296
IPI00121833.3	2	1	3	3	1_1_1_1_	4	10090 - Acaa1a;Acaa1b 3-ketoacyl-CoA thiolase A, peroxisomal	Acaa1a;Acaa1b	acetyl-Coenzyme A acyltransferase 1
IPI00226430.2	6	2	2	3	1_1_1_1_	4	10090 - Acaa2 3-ketoacyl-CoA thiolase, mitochondrial	Acaa2	acetyl-Coenzyme A acyltransferase 2 (mitochondrial 3-oxoacyl-Coenzyme A thiolase)
IPI00121136.6	13	9	5	6	1_1_1_1_	4	10090 - Acin1 Isoform 1 of Apoptotic chromatin condensation inducer in the nucleus	Acin1	apoptotic chromatin condensation inducer 1
IPI00125939.3	2	1	4	0	1_1_1_0_	3	10090 - Acot7 acyl-CoA thioesterase 7 isoform 1	Acot7	acyl-CoA thioesterase 7
IPI00221528.1	24	13	15	13	1_1_1_1_	4	10090 - Actbl2 Beta-actin-like protein 2	Actbl2	actin, beta-like 2
IPI00113895.1	3	3	5	3	1_1_1_1_	4	10090 - Actr1a Alpha-centractin	Actr1a	ARP1 actin-related protein 1 homolog A, centractin alpha (yeast)
IPI00115627.4	9	7	8	8	1_1_1_1_	4	10090 - Actr3 Actin-related protein 3	Actr3	ARP3 actin-related protein 3 homolog (yeast)
IPI00135969.2	1	1	1	1	1_1_1_1_	4	10090 - Adss Adenylosuccinate synthetase isozyme 2	Adss	adenylosuccinate synthetase, non muscle
IPI00223818.2	3	5	2	2	1_1_1_1_	4	10090 - Agps Alkylglycerone phosphate synthase	Agps	alkylglycerone phosphate synthase
IPI00122594.4	10	4	2	4	1_1_1_1_	4	10090 - Ahctf1 Protein ELYS	Ahctf1	AT hook containing transcription factor 1
IPI00553798.2	37	25	29	6	1_1_1_1_	4	10090 - Ahnak AHNAK nucleoprotein isoform 1	Ahnak	AHNAK nucleoprotein (desmoyokin)
IPI00856379.1	0	23	26	22	0_1_1_1_	3	10090 - Aldoa Fructose-bisphosphate aldolase	Aldoa	aldolase A, fructose-bisphosphate
IPI00118995.3	1	1	3	1	1_1_1_1_	4	10090 - Alg5 Putative uncharacterized protein (Fragment)	Alg5	asparagine-linked glycosylation 5 homolog (yeast, dolichyl-phosphate beta-glucosyltransferase)
IPI00172197.2	11	0	5	5	1_0_1_1_	3	10090 - Anln Actin-binding protein anillin	Anln	anillin, actin binding protein
IPI00468203.3	52	38	34	39	1_1_1_1_	4	10090 - Anxa2 Annexin A2	Anxa2	annexin A2
IPI00648683.3	11	8	10	5	1_1_1_1_	4	10090 - Ap1b1 Putative uncharacterized protein	Ap1b1	adaptor-related protein complex 1, beta 1 subunit
IPI00108780.7	6	5	3	2	1_1_1_1_	4	10090 - Ap2a1 Isoform A of AP-2 complex subunit alpha-1	Ap2a1	adaptor-related protein complex 2, alpha 1 subunit
IPI00399961.2	11	6	11	11	1_1_1_1_	4	10090 - Api5 Putative uncharacterized protein	Api5	apoptosis inhibitor 5
IPI00221616.5	1	1	2	0	1_1_1_0_	3	10090 - Arf6 ADP-ribosylation factor 6	Arf6	ADP-ribosylation factor 6
IPI00224070.2	1	5	3	0	1_1_1_0_	3	10090 - Arhgap1 Rho GTPase activating protein 1 isoform 1	Arhgap1	Rho GTPase activating protein 1
IPI00278498.10	2	0	2	1	1_0_1_1_	3	10090 - Arl1 ADP-ribosylation factor-like protein 1	Arl1	ADP-ribosylation factor-like 1
IPI00126913.5	24	19	19	7	1_1_1_1_	4	10090 - Atad3a Isoform 1 of ATPase family AAA domain-containing protein 3	Atad3a	ATPase family, AAA domain containing 3A
IPI00130280.1	15	14	16	17	1_1_1_1_	4	10090 - Atp5a1 ATP synthase subunit alpha, mitochondrial	Atp5a1	ATP synthase, H+ transporting, mitochondrial F1 complex, alpha subunit 1
IPI00468481.2	24	21	25	19	1_1_1_1_	4	10090 - Atp5b ATP synthase subunit beta, mitochondrial	Atp5b	ATP synthase, H+ transporting mitochondrial F1 complex, beta subunit
IPI00230633.1	9	0	7	2	1_0_1_1_	3	10090 - Aurka Isoform 2 of Serine/threonine-protein kinase 6	Aurka	aurora kinase A
IPI00222731.2	17	12	11	0	1_1_1_0_	3	10090 - Baiap2 Isoform 1 of Brain-specific angiogenesis inhibitor 1-associated protein 2	Baiap2	brain-specific angiogenesis inhibitor 1-associated protein 2
IPI00923656.1	24	20	17	12	1_1_1_1_	4	10090 - Baz1b Isoform 1 of Tyrosine-protein kinase BAZ1B	Baz1b	bromodomain adjacent to zinc finger domain, 1B
IPI00316184.1	9	5	9	4	1_1_1_1_	4	10090 - Bcas2 Pre-mRNA-splicing factor SPF27	Bcas2	breast carcinoma amplified sequence 2
IPI00115094.1	1	0	1	1	1_0_1_1_	3	10090 - Bckdk [3-methyl-2-oxobutanoate dehydrogenase [lipoamide]] kinase, mitochondrial	Bckdk	branched chain ketoacid dehydrogenase kinase
IPI00453860.2	14	6	3	6	1_1_1_1_	4	10090 - Bms1 BMS1-like, ribosome assembly protein	Bms1	BMS1 homolog, ribosome assembly protein (yeast)
IPI00387354.5	7	0	3	4	1_0_1_1_	3	10090 - Bop1 Ribosome biogenesis protein BOP1	Bop1	block of proliferation 1
IPI00170162.1	2	1	0	2	1_1_0_1_	3	10090 - Bre Isoform 1 of BRCA1-A complex subunit BRE	Bre	brain and reproductive organ-expressed protein
IPI00118762.6	5	0	3	3	1_0_1_1_	3	10090 - Bysl Bystin	Bysl	bystin-like
IPI00226932.2	8	1	2	3	1_1_1_1_	4	10090 - C230096C10Rik Isoform 1 of Uncharacterized protein KIAA0090	C230096C10Rik	RIKEN cDNA C230096C10 gene
IPI00119618.1	0	4	3	1	0_1_1_1_	3	10090 - Canx Calnexin	Canx	calnexin
IPI00474883.2	9	0	5	5	1_0_1_1_	3	10090 - Capzb Capping protein (Actin filament) muscle Z-line, beta	Capzb	capping protein (actin filament) muscle Z-line, beta
IPI00830611.1	3	0	3	1	1_0_1_1_	3	10090 - Carm1 70 kDa protein	Carm1	coactivator-associated arginine methyltransferase 1
IPI00312058.5	3	2	0	1	1_1_0_1_	3	10090 - Cat Catalase	Cat	catalase
IPI00752728.2	0	1	2	2	0_1_1_1_	3	10090 - Ccnh Putative uncharacterized protein	Ccnh	cyclin H
IPI00116283.1	0	26	19	8	0_1_1_1_	3	10090 - Cct3 T-complex protein 1 subunit gamma	Cct3	chaperonin containing TCP1, subunit 3 (gamma)
IPI00117087.1	2	2	0	1	1_1_0_1_	3	10090 - Cdc37 Hsp90 co-chaperone Cdc37	Cdc37	cell division cycle 37 homolog (S. cerevisiae)
IPI00120145.1	5	4	5	6	1_1_1_1_	4	10090 - Cdc40 Pre-mRNA-processing factor 17	Cdc40	cell division cycle 40 homolog (yeast)
IPI00284444.5	12	14	7	10	1_1_1_1_	4	10090 - Cdc5l Cell division cycle 5-related protein	Cdc5l	cell division cycle 5-like (S. pombe)
IPI00124240.1	2	5	4	2	1_1_1_1_	4	10090 - Cdk2 Isoform CDK2-beta of Cell division protein kinase 2	Cdk2	cyclin-dependent kinase 2
IPI00752710.1	9	10	5	6	1_1_1_1_	4	10090 - Cebpz Isoform CBF1 of CCAAT/enhancer-binding protein zeta	Cebpz	CCAAT/enhancer binding protein zeta
IPI00395213.1	2	2	4	2	1_1_1_1_	4	10090 - CELF1 Isoform 4 of CUG-BP- and ETR-3-like factor 1	Celf1	CUGBP, Elav-like family member 1
IPI00399663.1	6	0	2	1	1_0_1_1_	3	10090 - Cenpe Centromere-associated protein E	Cenpe	centromere protein E
IPI00313390.3	3	1	2	0	1_1_1_0_	3	10090 - Chchd6 Coiled-coil-helix-coiled-coil-helix domain-containing protein 6	Chchd6	coiled-coil-helix-coiled-coil-helix domain containing 6
IPI00857771.1	63	0	43	40	1_0_1_1_	3	10090 - Chd4 MKIAA4075 protein	Chd4	chromodomain helicase DNA binding protein 4
IPI00858099.1	4	3	0	1	1_1_0_1_	3	10090 - Chd8 Isoform 1 of Chromodomain-helicase-DNA-binding protein 8	Chd8	chromodomain helicase DNA binding protein 8
IPI00331601.4	14	0	7	8	1_0_1_1_	3	10090 - Cirh1a Cirhin	Cirh1a	cirrhosis, autosomal recessive 1A (human)
IPI00223047.2	3	0	6	4	1_0_1_1_	3	10090 - Ckap4 Cytoskeleton-associated protein 4	Ckap4	cytoskeleton-associated protein 4
IPI00169916.11	22	0	38	10	1_0_1_1_	3	10090 - Cltc Clathrin heavy chain 1	Cltc	clathrin, heavy polypeptide (Hc)
IPI00762331.2	1	1	1	0	1_1_1_0_	3	10090 - Cobll1 Isoform 1 of Cordon-bleu protein-like 1	Cobll1	Cobl-like 1
IPI00316359.1	4	3	0	4	1_1_0_1_	3	10090 - Copg2 Isoform 1 of Coatomer subunit gamma-2	Copg2	coatomer protein complex, subunit gamma 2
IPI00131870.3	0	3	3	1	0_1_1_1_	3	10090 - Cops3 COP9 signalosome complex subunit 3	Cops3	COP9 (constitutive photomorphogenic) homolog, subunit 3 (Arabidopsis thaliana)
IPI00314302.3	6	1	0	3	1_1_0_1_	3	10090 - Cpsf2 Cleavage and polyadenylation specificity factor subunit 2	Cpsf2	cleavage and polyadenylation specific factor 2
IPI00112414.1	12	8	0	10	1_1_0_1_	3	10090 - Cse1l Exportin-2	Cse1l	chromosome segregation 1-like (S. cerevisiae)
IPI00118795.1	4	7	2	0	1_1_1_0_	3	10090 - Csnk2a2 Casein kinase II subunit alpha'	Csnk2a2	casein kinase 2, alpha prime polypeptide
IPI00903356.1	1	2	3	2	1_1_1_1_	4	10090 - Cstf2 BetaCstF-64 variant 3	Cstf2	cleavage stimulation factor, 3' pre-RNA subunit 2
IPI00116929.1	8	3	7	9	1_1_1_1_	4	10090 - Cstf3 Cleavage stimulation factor subunit 3	Cstf3	cleavage stimulation factor, 3' pre-RNA, subunit 3
IPI00124047.1	5	0	6	2	1_0_1_1_	3	10090 - Cul1 Cullin-1	Cul1	cullin 1
IPI00119814.3	1	1	2	2	1_1_1_1_	4	10090 - Cwc15 Protein CWC15 homolog	Cwc15	CWC15 homolog (S. cerevisiae)
IPI00315794.1	3	3	3	2	1_1_1_1_	4	10090 - Cyb5b Cytochrome b5 type B	Cyb5b	cytochrome b5 type B
IPI00222675.3	13	7	9	8	1_1_1_1_	4	10090 - D19Bwg1357e D19Bwg1357e protein	D19Bwg1357e	DNA segment, Chr 19, Brigham & Women's Genetics 1357 expressed
IPI00316740.4	11	3	6	2	1_1_1_1_	4	10090 - Ddb1 DNA damage-binding protein 1	Ddb1	damage specific DNA binding protein 1
IPI00896604.1	8	6	1	0	1_1_1_0_	3	10090 - Ddx10 Probable ATP-dependent RNA helicase DDX10	Ddx10	DEAD (Asp-Glu-Ala-Asp) box polypeptide 10
IPI00459381.2	17	9	18	21	1_1_1_1_	4	10090 - Ddx18 ATP-dependent RNA helicase DDX18	Ddx18	DEAD (Asp-Glu-Ala-Asp) box polypeptide 18
IPI00889817.1	4	3	3	0	1_1_1_0_	3	10090 - Ddx19a Ddx19-like protein	Ddx19a	DEAD (Asp-Glu-Ala-As) box polypeptide 19A
IPI00120691.3	26	20	23	21	1_1_1_1_	4	10090 - Ddx21 Nucleolar RNA helicase 2	Ddx21	DEAD (Asp-Glu-Ala-Asp) box polypeptide 21
IPI00113576.2	4	0	2	2	1_0_1_1_	3	10090 - Ddx24 DEAD (Asp-Glu-Ala-Asp) box polypeptide 24 isoform 1	Ddx24	DEAD (Asp-Glu-Ala-Asp) box polypeptide 24
IPI00230236.2	9	12	13	13	1_1_1_1_	4	10090 - Ddx27 MCG14602, isoform CRA_c	Ddx27	DEAD (Asp-Glu-Ala-Asp) box polypeptide 27
IPI00109932.1	6	7	5	2	1_1_1_1_	4	10090 - Ddx6 Probable ATP-dependent RNA helicase DDX6	Ddx6	DEAD (Asp-Glu-Ala-Asp) box polypeptide 6
IPI00127902.2	16	4	6	7	1_1_1_1_	4	10090 - Dhx30 Isoform 3 of Putative ATP-dependent RNA helicase DHX30	Dhx30	DEAH (Asp-Glu-Ala-His) box polypeptide 30
IPI00461304.1	0	2	3	4	0_1_1_1_	3	10090 - Dhx8 ATP-dependent RNA helicase DHX8	Dhx8	DEAH (Asp-Glu-Ala-His) box polypeptide 8
IPI00831596.1	3	6	7	2	1_1_1_1_	4	10090 - Diap1 Diap1 protein	Diap1	diaphanous homolog 1 (Drosophila)
IPI00132208.1	8	4	9	0	1_1_1_0_	3	10090 - Dnaja1 DnaJ homolog subfamily A member 1	Dnaja1	DnaJ (Hsp40) homolog, subfamily A, member 1
IPI00119896.2	1	3	2	2	1_1_1_1_	4	10090 - Dnajb6 Isoform A of DnaJ homolog subfamily B member 6	Dnajb6	DnaJ (Hsp40) homolog, subfamily B, member 6
IPI00828649.1	16	5	6	0	1_1_1_0_	3	10090 - Dnajc11 DnaJ (Hsp40) homolog, subfamily C, member 11	Dnajc11	DnaJ (Hsp40) homolog, subfamily C, member 11
IPI00666885.3	7	1	2	0	1_1_1_0_	3	10090 - Dnajc13 DnaJ (Hsp40) homolog, subfamily C, member 13	Dnajc13	DnaJ (Hsp40) homolog, subfamily C, member 13
IPI00459033.2	3	2	3	2	1_1_1_1_	4	10090 - Dnajc3 DnaJ homolog subfamily C member 3	Dnajc3	DnaJ (Hsp40) homolog, subfamily C, member 3
IPI00463344.5	1	1	4	3	1_1_1_1_	4	10090 - Dnajc8 34 kDa protein	Dnajc8	DnaJ (Hsp40) homolog, subfamily C, member 8
IPI00469323.1	10	7	6	3	1_1_1_1_	4	10090 - Dnmt1 Cytosine-specific methyltransferase	Dnmt1	DNA methyltransferase (cytosine-5) 1
IPI00116700.1	1	2	2	3	1_1_1_1_	4	10090 - Dnttip1 Deoxynucleotidyltransferase terminal-interacting protein 1	Dnttip1	deoxynucleotidyltransferase, terminal, interacting protein 1
IPI00761536.5	2	2	0	1	1_1_0_1_	3	10090 - Dock5 Dedicator of cytokinesis protein 5	Dock5	dedicator of cytokinesis 5
IPI00882020.1	7	2	2	1	1_1_1_1_	4	10090 - Dpf2 Putative uncharacterized protein	Dpf2	D4, zinc and double PHD fingers family 2
IPI00119876.1	55	63	44	26	1_1_1_1_	4	10090 - Dync1h1 Cytoplasmic dynein 1 heavy chain 1	Dync1h1	dynein cytoplasmic 1 heavy chain 1
IPI00121623.1	5	5	5	4	1_1_1_1_	4	10090 - Dynll1 Dynein light chain 1, cytoplasmic	Dynll1	dynein light chain LC8-type 1
IPI00111829.1	5	6	4	3	1_1_1_1_	4	10090 - Ebna1bp2 Probable rRNA-processing protein EBP2	Ebna1bp2	EBNA1 binding protein 2
IPI00330066.5	1	5	2	2	1_1_1_1_	4	10090 - Edc4 Isoform 1 of Enhancer of mRNA-decapping protein 4	Edc4	enhancer of mRNA decapping 4
IPI00307837.6	75	45	53	45	1_1_1_1_	4	10090 - Eef1a1 Elongation factor 1-alpha 1	Eef1a1	eukaryotic translation elongation factor 1 alpha 1
IPI00318841.4	15	0	19	9	1_0_1_1_	3	10090 - Eef1g Elongation factor 1-gamma	Eef1g	eukaryotic translation elongation factor 1 gamma
IPI00466069.3	39	43	51	44	1_1_1_1_	4	10090 - Eef2 Elongation factor 2	Eef2	eukaryotic translation elongation factor 2
IPI00453532.2	3	1	1	0	1_1_1_0_	3	10090 - Eftud1 Elongation factor Tu GTP-binding domain-containing protein 1	Eftud1	elongation factor Tu GTP binding domain containing 1
IPI00555042.2	2	4	0	3	1_1_0_1_	3	10090 - Ehmt1 euchromatic histone methyltransferase 1 isoform 1	Ehmt1	euchromatic histone-lysine N-methyltransferase 1
IPI00756765.3	5	1	2	2	1_1_1_1_	4	10090 - Ehmt2 Euchromatic histone lysine N-methyltransferase 2	Ehmt2	euchromatic histone-lysine N-methyltransferase 2
IPI00474446.4	11	12	8	8	1_1_1_1_	4	10090 - Eif2s1 Eukaryotic translation initiation factor 2 subunit 1	Eif2s1	eukaryotic translation initiation factor 2, subunit 1 alpha
IPI00230415.5	0	7	12	8	0_1_1_1_	3	10090 - Eif2s3x Eukaryotic translation initiation factor 2 subunit 3, X-linked	Eif2s3x	eukaryotic translation initiation factor 2, subunit 3, structural gene X-linked
IPI00132250.1	10	7	13	4	1_1_1_1_	4	10090 - Eif3e Eukaryotic translation initiation factor 3 subunit E	Eif3e	eukaryotic translation initiation factor 3, subunit E
IPI00128202.1	5	2	2	0	1_1_1_0_	3	10090 - Eif3h Eukaryotic translation initiation factor 3 subunit H	Eif3h	eukaryotic translation initiation factor 3, subunit H
IPI00120322.1	2	2	2	0	1_1_1_0_	3	10090 - Eif3k Isoform 1 of Eukaryotic translation initiation factor 3 subunit K	Eif3k	eukaryotic translation initiation factor 3, subunit K
IPI00115580.4	7	2	10	2	1_1_1_1_	4	10090 - Eif3m Eukaryotic translation initiation factor 3 subunit M	Eif3m	eukaryotic translation initiation factor 3, subunit M
IPI00118676.3	23	17	24	0	1_1_1_0_	3	10090 - Eif4a1 Eukaryotic initiation factor 4A-I	Eif4a1	eukaryotic translation initiation factor 4A1
IPI00421179.1	13	17	28	12	1_1_1_1_	4	10090 - Eif4g1 Isoform 1 of Eukaryotic translation initiation factor 4 gamma 1	Eif4g1	eukaryotic translation initiation factor 4, gamma 1
IPI00756424.3	0	6	9	3	0_1_1_1_	3	10090 - Eif5b Eukaryotic translation initiation factor 5B	Eif5b	eukaryotic translation initiation factor 5B
IPI00115862.1	9	5	0	5	1_1_0_1_	3	10090 - Eif6 Eukaryotic translation initiation factor 6	Eif6	eukaryotic translation initiation factor 6
IPI00462072.3	6	0	9	7	1_0_1_1_	3	10090 - Eno1;LOC100044223;Gm5506 Alpha-enolase	Eno1	enolase 1, alpha non-neuron
IPI00310578.3	1	3	1	1	1_1_1_1_	4	10090 - Eny2 Enhancer of yellow 2 transcription factor homolog	Eny2	enhancer of yellow 2 homolog (Drosophila)
IPI00461822.6	4	0	1	2	1_0_1_1_	3	10090 - Ep300 Ep300 protein	Ep300	E1A binding protein p300
IPI00652029.1	6	1	4	0	1_1_1_0_	3	10090 - Epha2 ephrin receptor EphA2 precursor	Epha2	EPH receptor A2
IPI00221540.1	2	1	1	0	1_1_1_0_	3	10090 - Erlin2 Erlin-2	Erlin2	ER lipid raft associated 2
IPI00169521.4	4	2	0	2	1_1_0_1_	3	10090 - Esf1 ESF1 homolog	Esf1	ESF1, nucleolar pre-rRNA processing protein, homolog (S. cerevisiae)
IPI00128450.1	13	0	12	7	1_0_1_1_	3	10090 - Esyt1 Isoform 1 of Extended synaptotagmin-1	Esyt1	extended synaptotagmin-like protein 1
IPI00322492.3	5	0	6	3	1_0_1_1_	3	10090 - Ewsr1 Ewing sarcoma breakpoint region 1	Ewsr1	Ewing sarcoma breakpoint region 1
IPI00121437.1	0	1	1	1	0_1_1_1_	3	10090 - Exosc2 Exosome complex exonuclease RRP4	Exosc2	exosome component 2
IPI00330862.5	19	0	18	14	1_0_1_1_	3	10090 - Ezr;LOC100044177 Ezrin	Ezr	ezrin
IPI00330695.5	3	0	4	1	1_0_1_1_	3	10090 - Fam129b Niban-like protein 1	Fam129b	family with sequence similarity 129, member B
IPI00808098.1	5	3	5	3	1_1_1_1_	4	10090 - Far1 Isoform 4 of Fatty acyl-CoA reductase 1	Far1	fatty acyl CoA reductase 1
IPI00113223.2	16	0	17	5	1_0_1_1_	3	10090 - Fasn Fatty acid synthase	Fasn	fatty acid synthase
IPI00119581.2	0	14	11	14	0_1_1_1_	3	10090 - Fbl;LOC100044829 rRNA 2'-O-methyltransferase fibrillarin	Fbl	fibrillarin
IPI00410836.1	4	4	2	2	1_1_1_1_	4	10090 - Fen1 Putative uncharacterized protein	Fen1	flap structure-specific endonuclease 1
IPI00881462.1	4	1	1	0	1_1_1_0_	3	10090 - Fip1l1 67 kDa protein	Fip1l1	FIP1 like 1 (S. cerevisiae)
IPI00230139.5	0	3	6	3	0_1_1_1_	3	10090 - Fkbp4 Peptidyl-prolyl cis-trans isomerase FKBP4	Fkbp4	FK506 binding protein 4
IPI00131138.10	86	48	70	42	1_1_1_1_	4	10090 - Flna Isoform 1 of Filamin-A	Flna	filamin, alpha
IPI00663627.1	22	0	16	4	1_0_1_1_	3	10090 - Flnb Filamin-B	Flnb	filamin, beta
IPI00119242.1	1	1	1	1	1_1_1_1_	4	10090 - Fnbp4 formin binding protein 4	Fnbp4	formin binding protein 4
IPI00808277.2	1	0	1	2	1_0_1_1_	3	10090 - Foxk2 Isoform 1 of Forkhead box protein K2	Foxk2	forkhead box K2
IPI00119632.3	7	7	8	10	1_1_1_1_	4	10090 - Ftsj3 Putative rRNA methyltransferase 3	Ftsj3	FtsJ homolog 3 (E. coli)
IPI00122521.1	1	0	7	1	1_0_1_1_	3	10090 - Fxr1 Isoform E of Fragile X mental retardation syndrome-related protein 1	Fxr1	fragile X mental retardation, autosomal homolog 1
IPI00265025.5	1	1	3	0	1_1_1_0_	3	10090 - Galk1 galactokinase 1	Galk1	galactokinase 1
IPI00889253.1	0	2	3	2	0_1_1_1_	3	10090 - Gapvd1 Isoform 4 of GTPase-activating protein and VPS9 domain-containing protein 1	Gapvd1	GTPase activating protein and VPS9 domains 1
IPI00128615.1	10	8	6	5	1_1_1_1_	4	10090 - Gatad2b Isoform 1 of Transcriptional repressor p66-beta	Gatad2b	GATA zinc finger domain containing 2B
IPI00457499.5	29	12	18	14	1_1_1_1_	4	10090 - Gcn1l1 GCN1 general control of amino-acid synthesis 1-like 1	Gcn1l1	GCN1 general control of amino-acid synthesis 1-like 1 (yeast)
IPI00756025.1	11	0	17	11	1_0_1_1_	3	10090 - Gm10313 similar to LOC654472 protein	Gm10313	predicted pseudogene 10313	*
IPI00848775.1	12	21	17	11	1_1_1_1_	4	10090 - Gm16470 similar to Glyceraldehyde-3-phosphate dehydrogenase	Gm16470	predicted pseudogene 16470	*
IPI00848993.1	0	1	1	1	0_1_1_1_	3	10090 - LOC100048596;Gm3346 hypothetical protein isoform 1	Gm3346	predicted gene 3346
IPI00469351.3	5	5	6	6	1_1_1_1_	4	10090 - Gm4130 similar to heterogeneous nuclear ribonucleoprotein K	Gm4130	predicted gene 4130
IPI00659907.2	12	17	9	13	1_1_1_1_	4	10090 - EG545741 similar to glyceraldehyde-3-phosphate-dehydrogenase isoform 1	Gm5863	predicted gene 5863	*
IPI00753102.2	12	18	9	7	1_1_1_1_	4	10090 - Gm9034 similar to Glyceraldehyde-3-phosphate dehydrogenase	Gm9034	predicted pseudogene 9034	*
IPI00120716.3	2	4	6	2	1_1_1_1_	4	10090 - Gnb1 Guanine nucleotide-binding protein G(I)/G(S)/G(T) subunit beta-1	Gnb1	guanine nucleotide binding protein (G protein), beta 1
IPI00775863.1	1	3	5	0	1_1_1_0_	3	10090 - Gnb2 41 kDa protein	Gnb2	guanine nucleotide binding protein (G protein), beta 2
IPI00317740.5	22	0	13	7	1_0_1_1_	3	10090 - Gnb2l1 Guanine nucleotide-binding protein subunit beta-2-like 1	Gnb2l1	guanine nucleotide binding protein (G protein), beta polypeptide 2 like 1
IPI00116793.3	1	0	2	1	1_0_1_1_	3	10090 - Gps1 MCG2137, isoform CRA_a	Gps1	G protein pathway suppressor 1
IPI00230631.5	6	0	4	1	1_0_1_1_	3	10090 - Grk6 Isoform GRK6B of G protein-coupled receptor kinase 6	Grk6	G protein-coupled receptor kinase 6
IPI00750061.1	2	1	0	2	1_1_0_1_	3	10090 - Gsk3b 48 kDa protein	Gsk3b	glycogen synthase kinase 3 beta
IPI00856474.1	4	1	1	0	1_1_1_0_	3	10090 - Gtf2h1 62 kDa protein	Gtf2h1	general transcription factor II H, polypeptide 1
IPI00118172.1	6	2	2	2	1_1_1_1_	4	10090 - Gtf2h4 General transcription factor IIH subunit 4	Gtf2h4	general transcription factor II H, polypeptide 4
IPI00113686.2	14	6	5	8	1_1_1_1_	4	10090 - Gtf2i Isoform 1 of General transcription factor II-I	Gtf2i	general transcription factor II I
IPI00117642.3	14	13	0	11	1_1_0_1_	3	10090 - Gtpbp4 Nucleolar GTP-binding protein 1	Gtpbp4	GTP binding protein 4
IPI00316314.1	3	2	2	1	1_1_1_1_	4	10090 - Hacl1 2-hydroxyacyl-CoA lyase 1	Hacl1	2-hydroxyacyl-CoA lyase 1
IPI00223092.5	10	5	10	6	1_1_1_1_	4	10090 - Hadha Trifunctional enzyme subunit alpha, mitochondrial	Hadha	hydroxyacyl-Coenzyme A dehydrogenase/3-ketoacyl-Coenzyme A thiolase/enoyl-Coenzyme A hydratase (trifunctional protein), alpha subunit
IPI00469114.5	2	0	4	4	1_0_1_1_	3	10090 - Hba-a1;Hba-a2 Hemoglobin subunit alpha	Hba-a1;Hba-a2	hemoglobin alpha, adult chain
IPI00555131.2	3	0	4	3	1_0_1_1_	3	10090 - LOC100044141;Hbb-y Hemoglobin subunit epsilon-Y2	Hbb-y	hemoglobin Y, beta-like embryonic chain
IPI00114232.1	19	16	16	11	1_1_1_1_	4	10090 - Hdac1 Histone deacetylase 1	Hdac1	histone deacetylase 1
IPI00411022.1	14	0	11	12	1_0_1_1_	3	10090 - Heatr1 BAP28 protein	Heatr1	HEAT repeat containing 1
IPI00331597.6	0	17	16	18	0_1_1_1_	3	10090 - Hist1h1d Histone H1.3	Hist1h1d	histone cluster 1, H1d
IPI00623951.3	32	0	22	25	1_0_1_1_	3	10090 - Hist2h2ab;Hist2h2ac Histone H2A type 2-B	Hist2h2ab;Hist2h2ac	histone cluster 2
IPI00114342.1	1	0	1	1	1_0_1_1_	3	10090 - Hk2 Hexokinase-2	Hk2	hexokinase 2
IPI00379694.4	4	3	4	2	1_1_1_1_	4	10090 - Hmgcl 3-hydroxy-3-methylglutaryl CoA lyase precursor	Hmgcl	3-hydroxy-3-methylglutaryl-Coenzyme A lyase
IPI00109813.1	6	4	6	7	1_1_1_1_	4	10090 - Hnrnpa0 heterogeneous nuclear ribonucleoprotein A0	Hnrnpa0	heterogeneous nuclear ribonucleoprotein A0
IPI00277066.4	3	0	6	8	1_0_1_1_	3	10090 - Hnrnpab heterogeneous nuclear ribonucleoprotein A/B isoform 1	Hnrnpab	heterogeneous nuclear ribonucleoprotein A/B
IPI00132443.3	27	34	28	20	1_1_1_1_	4	10090 - Hnrpm Isoform 1 of Heterogeneous nuclear ribonucleoprotein M	Hnrnpm	heterogeneous nuclear ribonucleoprotein M
IPI00458583.3	36	29	37	0	1_1_1_0_	3	10090 - Hnrnpu Heterogeneous nuclear ribonucleoprotein U	Hnrnpu	heterogeneous nuclear ribonucleoprotein U
IPI00652428.1	0	2	1	2	0_1_1_1_	3	10090 - Hspa14 Isoform 2 of Heat shock 70 kDa protein 14	Hspa14	heat shock protein 14
IPI00323357.3	33	34	39	23	1_1_1_1_	4	10090 - Hspa8 Heat shock cognate 71 kDa protein	Hspa8	heat shock protein 8
IPI00463909.3	11	2	7	3	1_1_1_1_	4	10090 - Huwe1 HECT, UBA and WWE domain containing 1	Huwe1	HECT, UBA and WWE domain containing 1
IPI00875110.1	2	4	4	4	1_1_1_1_	4	10090 - Idh2 52 kDa protein	Idh2	isocitrate dehydrogenase 2 (NADP+), mitochondrial
IPI00318550.5	0	6	6	8	0_1_1_1_	3	10090 - Ilf2 Interleukin enhancer-binding factor 2	Ilf2	interleukin enhancer binding factor 2
IPI00116668.2	6	0	7	2	1_0_1_1_	3	10090 - Ilk Integrin-linked protein kinase	Ilk	integrin-linked kinase
IPI00678133.3	1	0	1	1	1_0_1_1_	3	10090 - Inf2 Isoform 1 of Inverted formin-2	Inf2	inverted formin, FH2 and WH2 domain containing
IPI00877221.2	22	6	9	10	1_1_1_1_	4	10090 - Ints1 Integrator complex subunit 1	Ints1	integrator complex subunit 1
IPI00227556.1	7	2	3	2	1_1_1_1_	4	10090 - Ints10 85 kDa protein	Ints10	integrator complex subunit 10
IPI00380394.6	0	4	7	4	0_1_1_1_	3	10090 - Ints3 Isoform 1 of Integrator complex subunit 3	Ints3	integrator complex subunit 3
IPI00223422.1	0	2	2	3	0_1_1_1_	3	10090 - Ints9 cDNA sequence BC028953	Ints9	integrator complex subunit 9
IPI00625893.3	11	0	11	9	1_0_1_1_	3	10090 - - 36 kDa protein	IPI00625893.3
IPI00850173.1	46	29	29	25	1_1_1_1_	4	10090 - - similar to Tubulin, beta 4	IPI00850173.1
IPI00874964.3	24	0	28	27	1_0_1_1_	3	10090 - - 36 kDa protein	IPI00874964.3
IPI00467447.3	24	30	28	16	1_1_1_1_	4	10090 - Iqgap1 Ras GTPase-activating-like protein IQGAP1	Iqgap1	IQ motif containing GTPase activating protein 1
IPI00406193.4	3	3	4	0	1_1_1_0_	3	10090 - Iqgap2 Ras GTPase-activating-like protein IQGAP2	Iqgap2	IQ motif containing GTPase activating protein 2
IPI00357145.5	4	2	5	4	1_1_1_1_	4	10090 - Irf2bp2 interferon regulatory factor 2 binding protein 2	Irf2bp2	interferon regulatory factor 2 binding protein 2
IPI00458765.2	13	10	9	9	1_1_1_1_	4	10090 - Khdrbs1 KH domain-containing, RNA-binding, signal transduction-associated protein 1	Khdrbs1	KH domain containing, RNA binding, signal transduction associated 1
IPI00130218.2	17	12	6	6	1_1_1_1_	4	10090 - Kif11 Kinesin-like protein KIF11	Kif11	kinesin family member 11
IPI00123947.1	11	6	4	2	1_1_1_1_	4	10090 - Kif20a Kinesin-like protein KIF20A	Kif20a	kinesin family member 20A
IPI00407864.3	4	5	4	0	1_1_1_0_	3	10090 - Kif23 kinesin family member 23	Kif23	kinesin family member 23
IPI00652012.1	5	2	1	5	1_1_1_1_	4	10090 - Krr1 Putative uncharacterized protein	Krr1	KRR1, small subunit (SSU) processome component, homolog (yeast)
IPI00622240.4	0	5	10	4	0_1_1_1_	3	10090 - Krt2 Keratin, type II cytoskeletal 2 epidermal	Krt2	keratin 2
IPI00462502.3	4	2	2	2	1_1_1_1_	4	10090 - Las1l Isoform 1 of Protein LAS1 homolog	Las1l	LAS1-like (S. cerevisiae)
IPI00853982.1	3	1	3	0	1_1_1_0_	3	10090 - Lemd3 Isoform 2 of Inner nuclear membrane protein Man1	Lemd3	LEM domain containing 3
IPI00348910.2	2	1	0	1	1_1_0_1_	3	10090 - Lgtn Isoform 2 of Ligatin	Lgtn	ligatin
IPI00473314.3	9	0	4	6	1_0_1_1_	3	10090 - Lig1 DNA ligase (ATP) 1	Lig1	ligase I, DNA, ATP-dependent
IPI00620256.3	42	42	49	47	1_1_1_1_	4	10090 - Lmna Isoform A of Lamin-A/C	Lmna	lamin A
IPI00230394.5	39	33	50	47	1_1_1_1_	4	10090 - Lmnb1 Lamin-B1	Lmnb1	lamin B1
IPI00126191.5	4	0	8	10	1_0_1_1_	3	10090 - Lmnb2 Isoform B2 of Lamin-B2	Lmnb2	lamin B2
IPI00850611.1	8	0	2	1	1_0_1_1_	3	10090 - LOC100044024 similar to mKIAA4005 protein	LOC100044024
IPI00849275.1	5	3	4	2	1_1_1_1_	4	10090 - LOC100044746 similar to Kifc1 protein	LOC100044746
IPI00853914.1	22	14	25	0	1_1_1_0_	3	10090 - LOC100045191 similar to heterogeneous nuclear ribonucleoprotein A2/B1	LOC100045191
IPI00850217.1	5	2	6	1	1_1_1_1_	4	10090 - LOC100046119 similar to ubiquitin-conjugating enzyme E2 UbcH-ben	LOC100046119
IPI00850430.1	11	9	10	5	1_1_1_1_	4	10090 - LOC100046151 similar to Solute carrier family 25 (mitochondrial carrier, phosphate carrier), member 3	LOC100046151
IPI00849506.1	0	2	1	2	0_1_1_1_	3	10090 - LOC100046895 similar to Quaking protein	LOC100046895
IPI00848992.1	0	1	3	1	0_1_1_1_	3	10090 - LOC100047515 similar to Exocyst complex component 1	LOC100047515
IPI00677780.1	0	4	3	3	0_1_1_1_	3	10090 - LOC631966 similar to putative translation initiation factor A121/Sui1	LOC631966
IPI00468717.7	15	10	12	7	1_1_1_1_	4	10090 - LOC633387 similar to Npm1 protein	LOC633387
IPI00673707.3	7	14	11	5	1_1_1_1_	4	10090 - LOC633677 Glutamyl-prolyl-tRNA synthetase	LOC633677
IPI00319518.4	5	4	3	4	1_1_1_1_	4	10090 - Lonp1 Lon protease homolog	Lonp1	lon peptidase 1, mitochondrial
IPI00319188.1	2	0	4	4	1_0_1_1_	3	10090 - Lpl;LOC669888 Lipoprotein lipase	Lpl	lipoprotein lipase
IPI00420706.4	3	9	6	0	1_1_1_0_	3	10090 - Lrpprc Leucine-rich PPR motif-containing protein, mitochondrial	Lrpprc	leucine-rich PPR-motif containing
IPI00138089.4	3	3	2	3	1_1_1_1_	4	10090 - Lrrc47 Leucine-rich repeat-containing protein 47	Lrrc47	leucine rich repeat containing 47
IPI00380309.3	5	6	0	4	1_1_0_1_	3	10090 - Luc7l2 Isoform 1 of Putative RNA-binding protein Luc7-like 2	Luc7l2	LUC7-like 2 (S. cerevisiae)
IPI00122418.1	6	4	3	6	1_1_1_1_	4	10090 - Luc7l3 Isoform 2 of Luc7-like protein 3	Luc7l3	LUC7-like 3 (S. cerevisiae)
IPI00123518.1	1	1	3	2	1_1_1_1_	4	10090 - Lypla2 Acyl-protein thioesterase 2	Lypla2	lysophospholipase 2
IPI00131088.1	4	6	4	2	1_1_1_1_	4	10090 - Mbd2 Isoform 1 of Methyl-CpG-binding domain protein 2	Mbd2	methyl-CpG binding domain protein 2
IPI00309398.6	8	12	12	5	1_1_1_1_	4	10090 - Mcm5 minichromosome maintenance deficient 5, cell division cycle 46	Mcm5	minichromosome maintenance deficient 5, cell division cycle 46 (S. cerevisiae)
IPI00753701.3	2	0	2	2	1_0_1_1_	3	10090 - Mdc1 mediator of DNA damage checkpoint 1	Mdc1	mediator of DNA-damage checkpoint 1
IPI00323592.2	3	9	11	0	1_1_1_0_	3	10090 - Mdh2 Malate dehydrogenase, mitochondrial	Mdh2	malate dehydrogenase 2, NAD (mitochondrial)
IPI00458039.3	13	0	5	5	1_0_1_1_	3	10090 - Mdn1 Midasin homolog	Mdn1	midasin homolog (yeast)
IPI00131967.3	1	1	0	2	1_1_0_1_	3	10090 - Med21 Mediator of RNA polymerase II transcription subunit 21	Med21	mediator complex subunit 21
IPI00880850.1	1	0	1	1	1_0_1_1_	3	10090 - Mgst1 26 kDa protein	Mgst1	microsomal glutathione S-transferase 1
IPI00225912.8	2	2	0	2	1_1_0_1_	3	10090 - Mki67ip Isoform 1 of MKI67 FHA domain-interacting nucleolar phosphoprotein	Mki67ip	Mki67 (FHA domain) interacting nucleolar phosphoprotein
IPI00315032.9	6	0	3	4	1_0_1_1_	3	10090 - Mll1 Isoform 1 of Histone-lysine N-methyltransferase MLL	Mll1	myeloid/lymphoid or mixed-lineage leukemia 1
IPI00277554.4	2	1	2	0	1_1_1_0_	3	10090 - Mocs3 Adenylyltransferase and sulfurtransferase MOCS3	Mocs3	molybdenum cofactor synthesis 3
IPI00651996.1	3	0	1	2	1_0_1_1_	3	10090 - Morf4l2 Putative uncharacterized protein	Morf4l2	mortality factor 4 like 2
IPI00402911.1	7	0	3	4	1_0_1_1_	3	10090 - Mphosph10 U3 small nucleolar ribonucleoprotein protein MPP10	Mphosph10	M-phase phosphoprotein 10 (U3 small nucleolar ribonucleoprotein)
IPI00132412.3	2	1	1	1	1_1_1_1_	4	10090 - Mrpl10 39S ribosomal protein L10, mitochondrial	Mrpl10	mitochondrial ribosomal protein L10
IPI00132578.1	5	0	1	2	1_0_1_1_	3	10090 - Mrto4 mRNA turnover protein 4 homolog	Mrto4	MRT4, mRNA turnover 4, homolog (S. cerevisiae)
IPI00118158.1	2	2	1	0	1_1_1_0_	3	10090 - Msh2 DNA mismatch repair protein Msh2	Msh2	mutS homolog 2 (E. coli)
IPI00896700.1	17	11	6	6	1_1_1_1_	4	10090 - Mtap1b microtubule-associated protein 1B	Mtap1b	microtubule-associated protein 1B
IPI00223621.1	4	0	5	1	1_0_1_1_	3	10090 - Mtap1s Microtubule-associated protein 1S	Mtap1s	microtubule-associated protein 1S
IPI00228113.5	7	4	8	5	1_1_1_1_	4	10090 - Mthfd1l 111 kDa protein	Mthfd1l	methylenetetrahydrofolate dehydrogenase (NADP+ dependent) 1-like
IPI00109824.1	2	2	0	2	1_1_0_1_	3	10090 - Mthfd2 Bifunctional methylenetetrahydrofolate dehydrogenase/cyclohydrolase, mitochondrial	Mthfd2	methylenetetrahydrofolate dehydrogenase (NAD+ dependent), methenyltetrahydrofolate cyclohydrolase
IPI00268673.5	4	1	0	1	1_1_0_1_	3	10090 - Mtor Isoform 1 of Serine/threonine-protein kinase mTOR	Mtor	mechanistic target of rapamycin (serine/threonine kinase)
IPI00331361.2	10	7	6	8	1_1_1_1_	4	10090 - Mybbp1a Myb-binding protein 1A	Mybbp1a	MYB binding protein (P160) 1a
IPI00123181.4	32	58	79	29	1_1_1_1_	4	10090 - Myh9 Myosin-9	Myh9	myosin, heavy polypeptide 9, non-muscle
IPI00849670.1	14	0	13	6	1_0_1_1_	3	10090 - Myof similar to Myoferlin (Fer-1-like protein 3) isoform 2	Myof	myoferlin
IPI00226576.1	7	0	3	3	1_0_1_1_	3	10090 - Naa25 Isoform 1 of N-terminal acetyltransferase B complex subunit NAA25	Naa25	N(alpha)-acetyltransferase 25, NatB auxiliary subunit
IPI00263042.3	1	1	0	1	1_1_0_1_	3	10090 - Naa38 U6 snRNA-associated Sm-like protein LSm8	Naa38	N(alpha)-acetyltransferase 38, NatC auxiliary subunit
IPI00400163.3	5	5	8	2	1_1_1_1_	4	10090 - Naa50 Isoform 4 of N-acetyltransferase NAT13	Naa50	N(alpha)-acetyltransferase 50, NatE catalytic subunit
IPI00111831.1	1	1	1	1	1_1_1_1_	4	10090 - Naca Nascent polypeptide-associated complex subunit alpha, muscle-specific form	Naca	nascent polypeptide-associated complex alpha polypeptide
IPI00133977.3	1	4	6	3	1_1_1_1_	4	10090 - Nap1l4 Putative uncharacterized protein	Nap1l4	nucleosome assembly protein 1-like 4
IPI00276866.1	26	15	18	18	1_1_1_1_	4	10090 - Nat10 N-acetyltransferase 10	Nat10	N-acetyltransferase 10
IPI00172226.3	6	0	4	1	1_0_1_1_	3	10090 - Ncapd2 Isoform 2 of Condensin complex subunit 1	Ncapd2	non-SMC condensin I complex, subunit D2
IPI00755241.1	4	2	3	2	1_1_1_1_	4	10090 - Nckap1 NCK-associated protein 1	Nckap1	NCK-associated protein 1
IPI00123871.2	4	0	4	1	1_0_1_1_	3	10090 - Ncor2 nuclear receptor co-repressor 2	Ncor2	nuclear receptor co-repressor 2
IPI00125960.1	12	12	16	8	1_1_1_1_	4	10090 - Ndrg1 Protein NDRG1	Ndrg1	N-myc downstream regulated gene 1
IPI00120984.5	3	0	2	2	1_0_1_1_	3	10090 - Ndufa8 NADH dehydrogenase [ubiquinone] 1 alpha subcomplex subunit 8	Ndufa8	NADH dehydrogenase (ubiquinone) 1 alpha subcomplex, 8
IPI00462445.2	3	6	12	4	1_1_1_1_	4	10090 - Nedd4 E3 ubiquitin-protein ligase NEDD4	Nedd4	neural precursor cell expressed, developmentally down-regulated 4
IPI00130129.1	3	0	2	2	1_0_1_1_	3	10090 - Nfib Isoform 1 of Nuclear factor 1 B-type	Nfib	nuclear factor I/B
IPI00123474.2	4	1	3	2	1_1_1_1_	4	10090 - Nfkb2 NF-kB2 splice variant 4	Nfkb2	nuclear factor of kappa light polypeptide gene enhancer in B-cells 2, p49/p100
IPI00131459.1	3	0	7	2	1_0_1_1_	3	10090 - Nme1;LOC100046344 Nucleoside diphosphate kinase A	Nme1	non-metastatic cells 1, protein (NM23A) expressed in
IPI00131459.1	3	2	7	0	1_1_1_0_	3	10090 - Nme1;LOC100046344 Nucleoside diphosphate kinase A	Nme1	non-metastatic cells 1, protein (NM23A) expressed in
IPI00128918.1	10	5	6	8	1_1_1_1_	4	10090 - Noc3l Nucleolar complex protein 3 homolog	Noc3l	nucleolar complex associated 3 homolog (S. cerevisiae)
IPI00119760.4	14	12	14	7	1_1_1_1_	4	10090 - Nol10 Nucleolar protein 10	Nol10	nucleolar protein 10
IPI00625464.1	1	0	1	1	1_0_1_1_	3	10090 - Nol9 Isoform 1 of Nucleolar protein 9	Nol9	nucleolar protein 9
IPI00133008.1	2	2	2	3	1_1_1_1_	4	10090 - Nop10 H/ACA ribonucleoprotein complex subunit 3	Nop10	NOP10 ribonucleoprotein homolog (yeast)
IPI00311453.5	15	12	14	0	1_1_1_0_	3	10090 - Nop2 nucleolar protein 1	Nop2	NOP2 nucleolar protein homolog (yeast)
IPI00318048.5	39	0	30	32	1_0_1_1_	3	10090 - Nop56 Nucleolar protein 56	Nop56	NOP56 ribonucleoprotein homolog (yeast)
IPI00463468.3	0	13	22	31	0_1_1_1_	3	10090 - Nop58 Nucleolar protein 58	Nop58	NOP58 ribonucleoprotein homolog (yeast)
IPI00131725.3	4	0	3	3	1_0_1_1_	3	10090 - Npm3 Nucleoplasmin-3	Npm3	nucleoplasmin 3
IPI00944164.1	1	2	1	0	1_1_1_0_	3	10090 - Nt5c2 5'-nucleotidase, cytosolic II isoform 1	Nt5c2	5'-nucleotidase, cytosolic II
IPI00263048.2	10	16	12	0	1_1_1_0_	3	10090 - Numa1 nuclear mitotic apparatus protein 1	Numa1	nuclear mitotic apparatus protein 1
IPI00221767.1	7	7	5	4	1_1_1_1_	4	10090 - Nup107 Nuclear pore complex protein Nup107	Nup107	nucleoporin 107
IPI00320303.1	17	10	11	12	1_1_1_1_	4	10090 - Nup133 Nuclear pore complex protein Nup133	Nup133	nucleoporin 133
IPI00453821.2	20	0	18	11	1_0_1_1_	3	10090 - Nup155 Nuclear pore complex protein Nup155	Nup155	nucleoporin 155
IPI00129535.1	29	9	18	23	1_1_1_1_	4	10090 - Nup160 Isoform 1 of Nuclear pore complex protein Nup160	Nup160	nucleoporin 160
IPI00929832.1	23	6	20	16	1_1_1_1_	4	10090 - Nup205 nucleoporin 205	Nup205	nucleoporin 205
IPI00229722.3	8	5	5	6	1_1_1_1_	4	10090 - Nup214 Nuclear pore complex protein Nup214	Nup214	nucleoporin 214
IPI00177202.1	4	6	4	5	1_1_1_1_	4	10090 - Nup43 Nucleoporin Nup43	Nup43	nucleoporin 43
IPI00139994.1	13	6	8	4	1_1_1_1_	4	10090 - Nup62 Nuclear pore glycoprotein p62	Nup62	nucleoporin 62
IPI00229021.1	4	0	5	4	1_0_1_1_	3	10090 - Nup88 Isoform 1 of Nuclear pore complex protein Nup88	Nup88	nucleoporin 88
IPI00474558.7	16	11	11	0	1_1_1_0_	3	10090 - Nup98 Nup98 protein	Nup98	nucleoporin 98
IPI00153653.1	3	0	5	3	1_0_1_1_	3	10090 - Nupl1 Isoform 1 of Nucleoporin p58/p45	Nupl1	nucleoporin like 1
IPI00121018.3	1	1	2	0	1_1_1_0_	3	10090 - Ogfr Isoform 1 of Opioid growth factor receptor	Ogfr	opioid growth factor receptor
IPI00124287.1	12	14	11	8	1_1_1_1_	4	10090 - Pabpc1 Polyadenylate-binding protein 1	Pabpc1	poly(A) binding protein, cytoplasmic 1
IPI00624863.1	9	0	12	11	1_0_1_1_	3	10090 - Paics Phosphoribosylaminoimidazole carboxylase, phosphoribosylaminoribosylaminoimidazole, succinocarboxamide synthetase, isoform CRA_a	Paics	phosphoribosylaminoimidazole carboxylase, phosphoribosylaminoribosylaminoimidazole, succinocarboxamide synthetase
IPI00112473.2	16	12	0	15	1_1_0_1_	3	10090 - Parp1 Isoform 1 of Poly [ADP-ribose] polymerase 1	Parp1	poly (ADP-ribose) polymerase family, member 1
IPI00139168.2	19	15	24	22	1_1_1_1_	4	10090 - Parp1 Putative uncharacterized protein	Parp1	poly (ADP-ribose) polymerase family, member 1
IPI00128904.1	9	14	16	5	1_1_1_1_	4	10090 - Pcbp1 Poly(rC)-binding protein 1	Pcbp1	poly(rC) binding protein 1
IPI00551454.3	17	7	10	10	1_1_1_1_	4	10090 - Pdcd11 Protein RRP5 homolog	Pdcd11	programmed cell death 11
IPI00845638.1	0	11	11	10	0_1_1_1_	3	10090 - Pds5b Isoform 3 of Sister chromatid cohesion protein PDS5 homolog B	Pds5b	PDS5, regulator of cohesion maintenance, homolog B (S. cerevisiae)
IPI00856504.1	0	1	2	2	0_1_1_1_	3	10090 - Pdxdc1 Isoform 4 of Pyridoxal-dependent decarboxylase domain-containing protein 1	Pdxdc1	pyridoxal-dependent decarboxylase domain containing 1
IPI00229939.1	2	2	0	1	1_1_0_1_	3	10090 - Peo1 Isoform 1 of Twinkle protein, mitochondrial	Peo1	progressive external ophthalmoplegia 1 (human)
IPI00620167.2	0	4	2	3	0_1_1_1_	3	10090 - Pes1 Pescadillo homolog 1, containing BRCT domain	Pes1	pescadillo homolog 1, containing BRCT domain (zebrafish)
IPI00555069.3	0	6	9	7	0_1_1_1_	3	10090 - Pgk1 Phosphoglycerate kinase 1	Pgk1	phosphoglycerate kinase 1
IPI00133440.1	5	9	9	0	1_1_1_0_	3	10090 - Phb Prohibitin	Phb	prohibitin
IPI00400215.3	165	133	131	0	1_1_1_0_	3	10090 - Plec Isoform PLEC-1A of Plectin-1	Plec	plectin
IPI00626385.4	162	133	130	107	1_1_1_1_	4	10090 - Plec plectin isoform 12alpha	Plec	plectin
IPI00120767.1	9	7	0	4	1_1_0_1_	3	10090 - Plk1 Serine/threonine-protein kinase PLK1	Plk1	polo-like kinase 1 (Drosophila)
IPI00785231.1	10	0	11	7	1_0_1_1_	3	10090 - Pnn pinin	Pnn	pinin
IPI00313726.2	17	9	6	4	1_1_1_1_	4	10090 - Polr1a DNA-directed RNA polymerase I subunit RPA1	Polr1a	polymerase (RNA) I polypeptide A
IPI00927994.1	9	2	0	3	1_1_0_1_	3	10090 - Polr1b RNA polymerase I polypeptide B	Polr1b	polymerase (RNA) I polypeptide B
IPI00136207.6	0	9	9	9	0_1_1_1_	3	10090 - Polr2a DNA-directed RNA polymerase II subunit RPB1	Polr2a	polymerase (RNA) II (DNA directed) polypeptide A
IPI00320034.6	17	4	5	4	1_1_1_1_	4	10090 - Polr2b DNA-directed RNA polymerase II subunit RPB2	Polr2b	polymerase (RNA) II (DNA directed) polypeptide B
IPI00263106.4	3	0	2	1	1_0_1_1_	3	10090 - Polr2g DNA-directed RNA polymerase II subunit RPB7	Polr2g	polymerase (RNA) II (DNA directed) polypeptide G
IPI00380737.1	3	4	3	0	1_1_1_0_	3	10090 - Pom121 Nuclear envelope pore membrane protein POM 121	Pom121	nuclear pore membrane protein 121
IPI00229849.2	0	2	2	1	0_1_1_1_	3	10090 - Ppat Putative uncharacterized protein	Ppat	phosphoribosyl pyrophosphate amidotransferase
IPI00554989.3	3	6	3	1	1_1_1_1_	4	10090 - Ppia Peptidyl-prolyl cis-trans isomerase	Ppia	peptidylprolyl isomerase A
IPI00330483.1	7	0	9	4	1_0_1_1_	3	10090 - Ppp1r10 Isoform 1 of Serine/threonine-protein phosphatase 1 regulatory subunit 10	Ppp1r10	protein phosphatase 1, regulatory subunit 10
IPI00111556.1	3	3	1	0	1_1_1_0_	3	10090 - Ppp2cb Serine/threonine-protein phosphatase 2A catalytic subunit beta isoform	Ppp2cb	protein phosphatase 2 (formerly 2A), catalytic subunit, beta isoform
IPI00120495.1	2	3	5	0	1_1_1_0_	3	10090 - Prmt1 Isoform 1 of Protein arginine N-methyltransferase 1	Prmt1	protein arginine N-methyltransferase 1
IPI00417140.1	3	0	4	3	1_0_1_1_	3	10090 - Prmt3 Isoform 1 of Protein arginine N-methyltransferase 3	Prmt3	protein arginine N-methyltransferase 3
IPI00229845.3	3	0	5	1	1_0_1_1_	3	10090 - Prmt5 Protein arginine N-methyltransferase 5	Prmt5	protein arginine N-methyltransferase 5
IPI00480507.1	19	15	16	0	1_1_1_0_	3	10090 - Prpf19 Isoform 1 of Pre-mRNA-processing factor 19	Prpf19	PRP19/PSO4 pre-mRNA processing factor 19 homolog (S. cerevisiae)
IPI00331170.1	0	7	7	9	0_1_1_1_	3	10090 - Prpf3 U4/U6 small nuclear ribonucleoprotein Prp3	Prpf3	PRP3 pre-mRNA processing factor 3 homolog (yeast)
IPI00331424.8	8	6	6	4	1_1_1_1_	4	10090 - Prpf31 Isoform 1 of U4/U6 small nuclear ribonucleoprotein Prp31	Prpf31	PRP31 pre-mRNA processing factor 31 homolog (yeast)
IPI00320690.1	0	4	3	4	0_1_1_1_	3	10090 - Prpf4b Serine/threonine-protein kinase PRP4 homolog	Prpf4b	PRP4 pre-mRNA processing factor 4 homolog B (yeast)
IPI00277001.4	0	1	3	3	0_1_1_1_	3	10090 - Psma4 Proteasome subunit alpha type-4	Psma4	proteasome (prosome, macropain) subunit, alpha type, 4
IPI00131407.1	2	1	0	1	1_1_0_1_	3	10090 - Psma5 Proteasome subunit alpha type-5	Psma5	proteasome (prosome, macropain) subunit, alpha type, 5
IPI00133428.3	2	7	6	2	1_1_1_1_	4	10090 - Psmc1 26S protease regulatory subunit 4	Psmc1	protease (prosome, macropain) 26S subunit, ATPase 1
IPI00270326.1	2	6	9	4	1_1_1_1_	4	10090 - Psmc2 Putative uncharacterized protein	Psmc2	proteasome (prosome, macropain) 26S subunit, ATPase, 2
IPI00135640.1	3	4	6	4	1_1_1_1_	4	10090 - Psmc5 26S protease regulatory subunit 8	Psmc5	protease (prosome, macropain) 26S subunit, ATPase 5
IPI00308785.1	0	1	1	3	0_1_1_1_	3	10090 - Ptgs2 Prostaglandin G/H synthase 2	Ptgs2	prostaglandin-endoperoxide synthase 2
IPI00133490.1	2	0	1	2	1_0_1_1_	3	10090 - LOC100044742;Ptp4a1;Gm8783 Protein tyrosine phosphatase type IVA 1	Ptp4a1	protein tyrosine phosphatase 4a1
IPI00153702.2	3	1	2	1	1_1_1_1_	4	10090 - Ptrh2 Bcl-2 inhibitor of transcription isoform a	Ptrh2	peptidyl-tRNA hydrolase 2
IPI00320422.3	3	0	1	1	1_0_1_1_	3	10090 - Pwp1 Periodic tryptophan protein 1 homolog	Pwp1	PWP1 homolog (S. cerevisiae)
IPI00127934.5	4	3	0	2	1_1_0_1_	3	10090 - Pxk Isoform 1 of PX domain-containing protein kinase-like protein	Pxk	PX domain containing serine/threonine kinase
IPI00222632.3	3	2	2	0	1_1_1_0_	3	10090 - Rab31 Rab31-like	Rab31	RAB31, member RAS oncogene family
IPI00127408.3	2	4	4	0	1_1_1_0_	3	10090 - Rac1 RAS-related C3 botulinum substrate 1, isoform CRA_a	Rac1	RAS-related C3 botulinum substrate 1
IPI00108774.1	1	0	2	2	1_0_1_1_	3	10090 - Rad23b UV excision repair protein RAD23 homolog B	Rad23b	RAD23b homolog (S. cerevisiae)
IPI00225719.3	17	13	13	10	1_1_1_1_	4	10090 - Rae1 mRNA export factor	Rae1	RAE1 RNA export 1 homolog (S. pombe)
IPI00130147.2	4	6	0	4	1_1_0_1_	3	10090 - Raly Isoform 2 of RNA-binding protein Raly	Raly	hnRNP-associated with lethal yellow
IPI00337844.4	18	21	18	0	1_1_1_0_	3	10090 - Ranbp2 E3 SUMO-protein ligase RanBP2	Ranbp2	RAN binding protein 2
IPI00928300.1	6	6	7	5	1_1_1_1_	4	10090 - Rangap1 RAN GTPase activating protein 1	Rangap1	Ran GTPase activating protein 1
IPI00405756.8	4	0	1	1	1_0_1_1_	3	10090 - Rasal2 RAS protein activator like 2	Rasal2	RAS protein activator like 2
IPI00719915.1	0	4	8	6	0_1_1_1_	3	10090 - Raver1 Isoform 1 of Ribonucleoprotein PTB-binding 1	Raver1	ribonucleoprotein, PTB-binding 1
IPI00132267.1	1	2	0	1	1_1_0_1_	3	10090 - Rbpj Isoform 1 of Recombining binding protein suppressor of hairless	Rbpj	recombination signal binding protein for immunoglobulin kappa J region
IPI00123762.2	10	0	8	4	1_0_1_1_	3	10090 - Rcc1 Regulator of chromosome condensation 1	Rcc1	regulator of chromosome condensation 1
IPI00222509.1	33	15	25	25	1_1_1_1_	4	10090 - Rcc2 Protein RCC2	Rcc2	regulator of chromosome condensation 2
IPI00665571.2	5	3	4	0	1_1_1_0_	3	10090 - Rfc3 Replication factor C subunit 3	Rfc3	replication factor C (activator 1) 3
IPI00653266.1	3	3	3	2	1_1_1_1_	4	10090 - Rfc4 Putative uncharacterized protein	Rfc4	replication factor C (activator 1) 4
IPI00421167.1	12	6	5	3	1_1_1_1_	4	10090 - Rif1 Isoform 3 of Telomere-associated protein RIF1	Rif1	RAP1 interacting factor homolog (yeast)
IPI00229787.3	3	1	2	1	1_1_1_1_	4	10090 - Rnaseh2a Ribonuclease H2 subunit A	Rnaseh2a	ribonuclease H2, large subunit
IPI00133880.2	8	3	3	1	1_1_1_1_	4	10090 - Rnf2 E3 ubiquitin-protein ligase RING2	Rnf2	ring finger protein 2
IPI00122227.1	6	3	3	0	1_1_1_0_	3	10090 - Rnps1 RNA/DNA-binding protein	Rnps1	ribonucleic acid binding protein S1
IPI00224505.7	4	4	4	3	1_1_1_1_	4	10090 - Gm15710;Rpl13;Gm12918 60S ribosomal protein L13	Rpl13	ribosomal protein L13
IPI00453768.4	10	0	10	4	1_0_1_1_	3	10090 - Rpl17 60S ribosomal protein L17	Rpl17	ribosomal protein L17
IPI00555113.2	7	5	6	6	1_1_1_1_	4	10090 - Rpl18 60S ribosomal protein L18	Rpl18	ribosomal protein L18
IPI00122426.1	1	2	2	1	1_1_1_1_	4	10090 - Rpl19 60S ribosomal protein L19	Rpl19	ribosomal protein L19
IPI00222546.5	11	7	7	10	1_1_1_1_	4	10090 - Rpl22;mCG_130059 60S ribosomal protein L22	Rpl22	ribosomal protein L22
IPI00139780.1	10	4	6	6	1_1_1_1_	4	10090 - Rpl23 60S ribosomal protein L23	Rpl23	ribosomal protein L23
IPI00222549.6	8	5	4	0	1_1_1_0_	3	10090 - Rpl30;Gm8808 60S ribosomal protein L30	Rpl30	ribosomal protein L30
IPI00111412.3	21	19	0	12	1_1_0_1_	3	10090 - Rpl4 60S ribosomal protein L4	Rpl4	ribosomal protein L4
IPI00308706.4	0	10	12	5	0_1_1_1_	3	10090 - Rpl5;Gm15500 60S ribosomal protein L5	Rpl5	ribosomal protein L5
IPI00311236.1	11	8	13	9	1_1_1_1_	4	10090 - Rpl7 60S ribosomal protein L7	Rpl7	ribosomal protein L7
IPI00330363.8	16	10	9	7	1_1_1_1_	4	10090 - Rpl7a;Gm8226 60S ribosomal protein L7a	Rpl7a	ribosomal protein L7A
IPI00111695.1	4	3	1	0	1_1_1_0_	3	10090 - Rpl7l1 60S ribosomal protein L7-like 1	Rpl7l1	ribosomal protein L7-like 1
IPI00137787.3	6	6	0	5	1_1_0_1_	3	10090 - Rpl8 60S ribosomal protein L8	Rpl8	ribosomal protein L8
IPI00139795.2	4	4	4	0	1_1_1_0_	3	10090 - Rplp2 60S acidic ribosomal protein P2	Rplp2	ribosomal protein, large P2
IPI00309035.2	15	9	15	0	1_1_1_0_	3	10090 - Rpn1 Dolichyl-diphosphooligosaccharide--protein glycosyltransferase subunit 1	Rpn1	ribophorin I
IPI00889811.1	8	7	6	7	1_1_1_1_	4	10090 - Rpn2 Putative uncharacterized protein	Rpn2	ribophorin II
IPI00338515.4	2	3	2	3	1_1_1_1_	4	10090 - Rprd1b Isoform 1 of Regulation of nuclear pre-mRNA domain-containing protein 1B	Rprd1b	regulation of nuclear pre-mRNA domain containing 1B
IPI00454123.4	1	2	0	2	1_1_0_1_	3	10090 - Rprd2 Isoform 1 of Regulation of nuclear pre-mRNA domain-containing protein 2	Rprd2	regulation of nuclear pre-mRNA domain containing 2
IPI00117569.3	10	8	10	0	1_1_1_0_	3	10090 - Rps11 Putative uncharacterized protein	Rps11	ribosomal protein S11
IPI00319231.4	7	4	5	4	1_1_1_1_	4	10090 - Rps15 40S ribosomal protein S15	Rps15	ribosomal protein S15
IPI00465880.4	0	5	8	7	0_1_1_1_	3	10090 - Rps17 40S ribosomal protein S17	Rps17	ibosomal protein S17
IPI00131357.7	6	2	0	6	1_1_0_1_	3	10090 - Rps23 Putative uncharacterized protein	Rps23	ribosomal protein S23
IPI00173160.3	1	0	3	2	1_0_1_1_	3	10090 - Gm9846;Rps27 40S ribosomal protein S27	Rps27	ribosomal protein S27
IPI00134599.1	16	12	16	13	1_1_1_1_	4	10090 - Rps3 40S ribosomal protein S3	Rps3	ribosomal protein S3
IPI00331345.5	22	7	18	9	1_1_1_1_	4	10090 - Rps3a 40S ribosomal protein S3a	Rps3a	ribosomal protein S3A
IPI00331092.7	12	7	14	8	1_1_1_1_	4	10090 - Rps4x 40S ribosomal protein S4, X isoform	Rps4x	ribosomal protein S4, X-linked
IPI00136984.1	13	7	8	11	1_1_1_1_	4	10090 - Rps7 40S ribosomal protein S7	Rps7	ribosomal protein S7
IPI00121149.1	1	4	0	1	1_1_0_1_	3	10090 - Rrbp1 Isoform 3 of Ribosome-binding protein 1	Rrbp1	ribosome binding protein 1
IPI00420344.1	14	5	11	5	1_1_1_1_	4	10090 - Rrp12 RRP12-like protein	Rrp12	ribosomal RNA processing 12 homolog (S. cerevisiae)
IPI00226149.6	3	3	3	3	1_1_1_1_	4	10090 - Rsl1d1 Putative uncharacterized protein	Rsl1d1	ribosomal L1 domain containing 1
IPI00124426.1	2	1	0	1	1_1_0_1_	3	10090 - Runx2 Isoform 1 of Runt-related transcription factor 2	Runx2	runt related transcription factor 2
IPI00133985.1	13	10	10	11	1_1_1_1_	4	10090 - Ruvbl1 RuvB-like 1	Ruvbl1	RuvB-like protein 1
IPI00123557.3	10	0	9	5	1_0_1_1_	3	10090 - Ruvbl2 RuvB-like 2	Ruvbl2	RuvB-like protein 2
IPI00222555.5	1	2	1	1	1_1_1_1_	4	10090 - S100a10 Protein S100-A10	S100a10	S100 calcium binding protein A10 (calpactin)
IPI00323674.6	0	9	7	7	0_1_1_1_	3	10090 - Sart1 U4/U6.U5 tri-snRNP-associated protein 1	Sart1	squamous cell carcinoma antigen recognized by T-cells 1
IPI00121153.3	1	1	1	0	1_1_1_0_	3	10090 - Scd3 stearoyl-coenzyme A desaturase 3	Scd3	stearoyl-coenzyme A desaturase 3
IPI00230351.1	4	6	7	0	1_1_1_0_	3	10090 - Sdha Succinate dehydrogenase [ubiquinone] flavoprotein subunit, mitochondrial	Sdha	succinate dehydrogenase complex, subunit A, flavoprotein (Fp)
IPI00114368.3	1	1	3	1	1_1_1_1_	4	10090 - Sec22b Vesicle-trafficking protein SEC22b	Sec22b	SEC22 vesicle trafficking protein homolog B (S. cerevisiae)
IPI00317604.1	6	7	8	9	1_1_1_1_	4	10090 - Sec23b Protein transport protein Sec23B	Sec23b	SEC23B (S. cerevisiae)
IPI00331088.1	1	2	1	0	1_1_1_0_	3	10090 - Serpinf1 Pigment epithelium-derived factor	Serpinf1	serine (or cysteine) peptidase inhibitor, clade F, member 1
IPI00880252.1	8	9	15	14	1_1_1_1_	4	10090 - Serpinh1 serine (or cysteine) proteinase inhibitor, clade H, member 1 precursor	Serpinh1	serine (or cysteine) peptidase inhibitor, clade H, member 1
IPI00856488.1	7	0	6	5	1_0_1_1_	3	10090 - Sf1 62 kDa protein	Sf1	splicing factor 1
IPI00408796.3	16	13	7	9	1_1_1_1_	4	10090 - Sf3a1 Splicing factor 3A subunit 1	Sf3a1	splicing factor 3a, subunit 1
IPI00380281.4	6	2	2	3	1_1_1_1_	4	10090 - Sf3a2 splicing factor 3a, subunit 2	Sf3a2	splicing factor 3a, subunit 2
IPI00137848.1	0	10	9	10	0_1_1_1_	3	10090 - Sf3a3 Splicing factor 3A subunit 3	Sf3a3	splicing factor 3a, subunit 3
IPI00623284.4	35	20	24	21	1_1_1_1_	4	10090 - Sf3b1 Splicing factor 3B subunit 1	Sf3b1	splicing factor 3b, subunit 1
IPI00280250.5	9	4	5	0	1_1_1_0_	3	10090 - Sh3pxd2a Isoform 1 of SH3 and PX domain-containing protein 2A	Sh3pxd2a	SH3 and PX domains 2A
IPI00113134.1	8	8	5	6	1_1_1_1_	4	10090 - Skiv2l2 Superkiller viralicidic activity 2-like 2	Skiv2l2	superkiller viralicidic activity 2-like 2 (S. cerevisiae)
IPI00308162.3	4	0	2	2	1_0_1_1_	3	10090 - Slc25a12 Calcium-binding mitochondrial carrier protein Aralar1	Slc25a12	solute carrier family 25 (mitochondrial carrier, Aralar), member 12
IPI00396739.1	44	25	35	35	1_1_1_1_	4	10090 - Smarca5 SWI/SNF-related matrix-associated actin-dependent regulator of chromatin subfamily A member 5	Smarca5	SWI/SNF related, matrix associated, actin dependent regulator of chromatin, subfamily a, member 5
IPI00125662.2	24	14	16	18	1_1_1_1_	4	10090 - Smarcc1 Isoform 1 of SWI/SNF complex subunit SMARCC1	Smarcc1	SWI/SNF related, matrix associated, actin dependent regulator of chromatin, subfamily c, member 1
IPI00459742.2	19	0	10	13	1_0_1_1_	3	10090 - Smarcc2 Isoform 1 of SWI/SNF complex subunit SMARCC2	Smarcc2	SWI/SNF related, matrix associated, actin dependent regulator of chromatin, subfamily c, member 2
IPI00119892.1	7	2	1	4	1_1_1_1_	4	10090 - Smarce1 SWI/SNF-related matrix-associated actin-dependent regulator chromatin subfamily E member 1	Smarce1	SWI/SNF related, matrix associated, actin dependent regulator of chromatin, subfamily e, member 1
IPI00606586.2	12	11	0	7	1_1_0_1_	3	10090 - Smc2 Putative uncharacterized protein	Smc2	structural maintenance of chromosomes 2
IPI00137433.3	15	8	9	6	1_1_1_1_	4	10090 - Smchd1 Structural maintenance of chromosomes flexible hinge domain-containing protein 1	Smchd1	SMC hinge domain containing 1
IPI00123129.1	12	9	11	5	1_1_1_1_	4	10090 - Snd1 Staphylococcal nuclease domain-containing protein 1	Snd1	staphylococcal nuclease and tudor domain containing 1
IPI00322749.3	7	0	6	2	1_0_1_1_	3	10090 - Snrpd1 Small nuclear ribonucleoprotein Sm D1	Snrpd1	small nuclear ribonucleoprotein D1
IPI00943994.1	2	0	2	3	1_0_1_1_	3	10090 - Snrpf Small nuclear ribonucleoprotein F	Snrpf	small nuclear ribonucleoprotein polypeptide F
IPI00109109.1	0	1	2	1	0_1_1_1_	3	10090 - Sod2 Superoxide dismutase [Mn], mitochondrial	Sod2	superoxide dismutase 2, mitochondrial
IPI00828218.2	6	13	5	7	1_1_1_1_	4	10090 - Son 269 kDa protein	Son	SON DNA binding protein
IPI00387377.1	2	0	2	1	1_0_1_1_	3	10090 - Srp54a;Srp54b Isoform 1 of Signal recognition particle 54 kDa protein	Srp54a;Srp54b	signal recognition particle 54
IPI00316133.7	5	4	5	1	1_1_1_1_	4	10090 - Srp72 signal recognition particle 72	Srp72	signal recognition particle 72
IPI00314984.4	2	2	1	3	1_1_1_1_	4	10090 - SRSF10 Putative uncharacterized protein	Srsf10	serine/arginine-rich splicing factor 10
IPI00129323.1	11	9	10	0	1_1_1_0_	3	10090 - SRSF3 Isoform Long of Splicing factor, arginine/serine-rich 3	Srsf3	serine/arginine-rich splicing factor 3
IPI00222763.1	13	7	5	0	1_1_1_0_	3	10090 - SRSF7 Isoform 1 of Splicing factor, arginine/serine-rich 7	Srsf7	serine/arginine-rich splicing factor 7
IPI00116308.1	0	1	3	3	0_1_1_1_	3	10090 - St13 Hsc70-interacting protein	St13	suppression of tumorigenicity 13
IPI00109108.2	3	3	4	2	1_1_1_1_	4	10090 - Stt3a Putative uncharacterized protein	Stt3a	STT3, subunit of the oligosaccharyltransferase complex, homolog A (S. cerevisiae)
IPI00263505.1	7	0	4	5	1_0_1_1_	3	10090 - Sun1 Isoform 1 of SUN domain-containing protein 1	Sun1	Sad1 and UNC84 domain containing 1
IPI00454050.1	7	6	2	2	1_1_1_1_	4	10090 - Supt6h Transcription elongation factor SPT6	Supt6h	suppressor of Ty 6 homolog (S. cerevisiae)
IPI00856427.1	5	3	0	1	1_1_0_1_	3	10090 - Sympk symplekin	Sympk	symplekin
IPI00121758.1	16	0	18	13	1_0_1_1_	3	10090 - Tardbp TAR DNA-binding protein 43	Tardbp	TAR DNA binding protein
IPI00468688.4	2	6	6	0	1_1_1_0_	3	10090 - Tars Threonyl-tRNA synthetase, cytoplasmic	Tars	threonyl-tRNA synthetase
IPI00124057.2	4	0	3	6	1_0_1_1_	3	10090 - Tbl3 Transducin beta-like protein 3	Tbl3	transducin (beta)-like 3
IPI00471277.1	10	9	5	0	1_1_1_0_	3	10090 - Tcerg1 Isoform 1 of Transcription elongation regulator 1	Tcerg1	transcription elongation regulator 1 (CA150)
IPI00226897.1	2	4	3	2	1_1_1_1_	4	10090 - Tcfap2a Isoform 4 of Transcription factor AP-2-alpha	Tcfap2a	transcription factor AP-2, alpha
IPI00127599.3	3	1	0	2	1_1_0_1_	3	10090 - Terf2 Isoform 1 of Telomeric repeat-binding factor 2	Terf2	telomeric repeat binding factor 2
IPI00124700.1	2	1	1	3	1_1_1_1_	4	10090 - Tfrc Transferrin receptor protein 1	Tfrc	transferrin receptor
IPI00648010.2	6	3	0	4	1_1_0_1_	3	10090 - Thoc5 THO complex 5	Thoc5	THO complex 5
IPI00134484.1	1	2	1	1	1_1_1_1_	4	10090 - Timm10;Timm13 Mitochondrial import inner membrane translocase subunit Tim13	Timm13	translocase of inner mitochondrial membrane 13 homolog (yeast)
IPI00648094.3	1	0	1	2	1_0_1_1_	3	10090 - Tk1 Thymidine kinase, cytosolic	Tk1	thymidine kinase 1
IPI00137409.3	0	10	11	9	0_1_1_1_	3	10090 - Tkt Transketolase	Tkt	transketolase
IPI00929758.1	7	26	25	7	1_1_1_1_	4	10090 - Tln1 talin 1	Tln1	talin 1
IPI00127983.1	1	1	0	1	1_1_0_1_	3	10090 - Tmed2;Gm10698 Transmembrane emp24 domain-containing protein 2	Tmed2	transmembrane emp24 domain trafficking protein 2
IPI00896574.1	11	9	11	7	1_1_1_1_	4	10090 - Tmpo thymopoietin isoform alpha	Tmpo	thymopoietin
IPI00377728.2	4	6	4	3	1_1_1_1_	4	10090 - Tomm70a Mitochondrial import receptor subunit TOM70	Tomm70a	translocase of outer mitochondrial membrane 70 homolog A (yeast)
IPI00122223.1	60	47	55	46	1_1_1_1_	4	10090 - Top2a DNA topoisomerase 2-alpha	Top2a	topoisomerase (DNA) II alpha
IPI00880644.2	42	34	20	36	1_1_1_1_	4	10090 - Tpr nuclear pore complex-associated protein Tpr	Tpr	translocated promoter region
IPI00420481.5	7	7	1	2	1_1_1_1_	4	10090 - Tpx2 Targeting protein for Xklp2	Tpx2	TPX2, microtubule-associated protein homolog (Xenopus laevis)
IPI00229927.2	1	1	2	0	1_1_1_0_	3	10090 - Trip10 Isoform 1 of Cdc42-interacting protein 4	Trip10	thyroid hormone receptor interactor 10
IPI00318000.4	2	2	2	1	1_1_1_1_	4	10090 - Trip13 Thyroid receptor-interacting protein 13	Trip13	thyroid hormone receptor interactor 13
IPI00776048.1	37	12	11	9	1_1_1_1_	4	10090 - Trrap 437 kDa protein	Trrap	transformation/transcription domain-associated protein
IPI00403810.2	51	32	36	32	1_1_1_1_	4	10090 - Tuba1c Tubulin alpha-1C chain	Tuba1c	tubulin, alpha 1c
IPI00109061.1	48	0	27	26	1_0_1_1_	3	10090 - Tubb2b Tubulin beta-2B chain	Tubb2b	tubulin, beta 2B
IPI00169463.1	55	35	35	30	1_1_1_1_	4	10090 - Tubb2c Tubulin beta-2C chain	Tubb2c	tubulin, beta 2C
IPI00112251.1	31	20	19	18	1_1_1_1_	4	10090 - Tubb3 Tubulin beta-3 chain	Tubb3	tubulin, beta 3
IPI00407835.2	0	6	5	1	0_1_1_1_	3	10090 - Ubap2l Isoform 5 of Ubiquitin-associated protein 2-like	Ubap2l	ubiquitin associated protein 2-like
IPI00114869.1	18	0	8	6	1_0_1_1_	3	10090 - Ubtf Isoform UBF1 of Nucleolar transcription factor 1	Ubtf	upstream binding transcription factor, RNA polymerase I
IPI00420949.3	21	17	19	11	1_1_1_1_	4	10090 - Upf1 Isoform 1 of Regulator of nonsense transcripts 1	Upf1	UPF1 regulator of nonsense transcripts homolog (yeast)
IPI00653598.2	0	5	7	6	0_1_1_1_	3	10090 - Uqcrc1 ubiquinol-cytochrome c reductase core protein 1 precursor	Uqcrc1	ubiquinol-cytochrome c reductase core protein 1
IPI00119138.1	4	8	10	7	1_1_1_1_	4	10090 - Uqcrc2 Cytochrome b-c1 complex subunit 2, mitochondrial	Uqcrc2	ubiquinol cytochrome c reductase core protein 2
IPI00224210.5	1	0	1	1	1_0_1_1_	3	10090 - Uqcrq Cytochrome b-c1 complex subunit 8	Uqcrq	ubiquinol-cytochrome c reductase, complex III subunit VII
IPI00929784.1	6	3	2	3	1_1_1_1_	4	10090 - Usp36 Ubiquitin carboxyl-terminal hydrolase 36	Usp36	ubiquitin specific peptidase 36
IPI00647978.2	10	2	3	4	1_1_1_1_	4	10090 - Usp48 Isoform 2 of Ubiquitin carboxyl-terminal hydrolase 48	Usp48	ubiquitin specific peptidase 48
IPI00463367.2	6	4	3	5	1_1_1_1_	4	10090 - Usp7 Isoform 2 of Ubiquitin carboxyl-terminal hydrolase 7	Usp7	ubiquitin specific peptidase 7
IPI00462762.2	3	3	3	2	1_1_1_1_	4	10090 - Utp14a Isoform 1 of U3 small nucleolar RNA-associated protein 14 homolog A	Utp14a	UTP14, U3 small nucleolar ribonucleoprotein, homolog A (yeast)
IPI00850851.1	26	5	12	11	1_1_1_1_	4	10090 - Utp20 down-regulated in metastasis	Utp20	UTP20, small subunit (SSU) processome component, homolog (yeast)
IPI00122549.1	10	8	6	0	1_1_1_0_	3	10090 - Vdac1 Isoform Pl-VDAC1 of Voltage-dependent anion-selective channel protein 1	Vdac1	voltage-dependent anion channel 1
IPI00122548.3	6	6	7	0	1_1_1_0_	3	10090 - Vdac3 Voltage-dependent anion channel 3	Vdac3	voltage-dependent anion channel 3
IPI00111181.1	2	3	7	0	1_1_1_0_	3	10090 - Vps35 Vacuolar protein sorting-associated protein 35	Vps35	vacuolar protein sorting 35
IPI00132936.1	7	5	3	0	1_1_1_0_	3	10090 - Vrk1 Isoform 1 of Serine/threonine-protein kinase VRK1	Vrk1	vaccinia related kinase 1
IPI00221822.1	13	4	7	0	1_1_1_0_	3	10090 - Wdr3 WD repeat-containing protein 3	Wdr3	WD repeat domain 3
IPI00876121.1	10	4	5	4	1_1_1_1_	4	10090 - Wdr36 WD repeat domain 36 isoform 1	Wdr36	WD repeat domain 36
IPI00938465.1	7	3	5	5	1_1_1_1_	4	10090 - Wdr43 WD repeat-containing protein 43	Wdr43	WD repeat domain 43
IPI00139957.1	3	0	3	4	1_0_1_1_	3	10090 - Wdr5 WD repeat-containing protein 5	Wdr5	WD repeat domain 5
IPI00221414.1	5	2	3	2	1_1_1_1_	4	10090 - Wdr82 WD repeat-containing protein 82	Wdr82	WD repeat domain containing 82
IPI00107975.9	12	5	6	4	1_1_1_1_	4	10090 - Whsc1 Isoform 2 of Probable histone-lysine N-methyltransferase NSD2	Whsc1	Wolf-Hirschhorn syndrome candidate 1 (human)
IPI00263016.4	4	0	3	2	1_0_1_1_	3	10090 - Wiz Isoform L of Protein Wiz	Wiz	widely interspaced zinc finger motifs
IPI00120046.1	8	0	5	4	1_0_1_1_	3	10090 - Xrn2 Isoform 1 of 5'-3' exoribonuclease 2	Xrn2	5'-3' exoribonuclease 2
IPI00314153.4	6	10	8	4	1_1_1_1_	4	10090 - Yars Tyrosyl-tRNA synthetase	Yars	tyrosyl-tRNA synthetase
IPI00396833.1	0	1	2	1	0_1_1_1_	3	10090 - Yars2 Tyrosyl-tRNA synthetase, mitochondrial	Yars2	tyrosyl-tRNA synthetase 2 (mitochondrial)
IPI00230682.6	3	4	8	3	1_1_1_1_	4	10090 - Ywhab Isoform Long of 14-3-3 protein beta/alpha	Ywhab	tyrosine 3-monooxygenase/tryptophan 5-monooxygenase activation protein, beta polypeptide
IPI00118384.1	3	11	15	6	1_1_1_1_	4	10090 - Ywhae 14-3-3 protein epsilon	Ywhae	tyrosine 3-monooxygenase/tryptophan 5-monooxygenase activation protein, epsilon polypeptide
IPI00116498.1	4	4	7	2	1_1_1_1_	4	10090 - Ywhaz 14-3-3 protein zeta/delta	Ywhaz	tyrosine 3-monooxygenase/tryptophan 5-monooxygenase activation protein, zeta polypeptide
IPI00421162.4	1	0	2	2	1_0_1_1_	3	10090 - Zc3h11a Zinc finger CCCH domain-containing protein 11A	Zc3h11a	zinc finger CCCH type containing 11A
IPI00608012.1	5	1	3	0	1_1_1_0_	3	10090 - Zfml Isoform 1 of Zinc finger protein 638	Zfml	zinc finger, matrin-like
IPI00123531.1	2	0	1	1	1_0_1_1_	3	10090 - Zfp148, Zinc finger protein 148	Zfp148	zinc finger protein 148
IPI00222382.5	2	3	2	0	1_1_1_0_	3	10090 - Zfp512 Zinc finger protein 512	Zfp512	zinc finger protein 512
IPI00108978.4	8	1	1	3	1_1_1_1_	4	10090 - Zmynd8 Protein kinase C binding protein 1	Zmynd8	zinc finger, MYND-type containing 8
IPI00363563.4	0	6	6	4	0_1_1_1_	3	10116 - Aars Alanyl-tRNA synthetase, cytoplasmic	Aars	alanyl-tRNA synthetase
IPI00214487.1	6	0	5	4	1_0_1_1_	3	10116 - Aatf Protein AATF	Aatf	apoptosis antagonizing transcription factor
IPI00421969.1	7	8	6	4	1_1_1_1_	4	10116 - Abcf1 ATP-binding cassette sub-family F member 1	Abcf1	ATP-binding cassette, sub-family F (GCN20), member 1
IPI00650097.3	3	0	3	1	1_0_1_1_	3	10116 - ACAA1 3-ketoacyl-CoA thiolase A, peroxisomal	Acaa1	acetyl-CoA acyltransferase 1
IPI00214665.2	7	14	16	9	1_1_1_1_	4	10116 - Acly ATP-citrate synthase isoform 1	Acly	ATP citrate lyase
IPI00421539.3	0	10	9	3	0_1_1_1_	3	10116 - Aco2 Aconitate hydratase, mitochondrial	Aco2	aconitase 2, mitochondrial
IPI00211510.1	3	0	1	1	1_0_1_1_	3	10116 - Acox1 Isoform 1 of Peroxisomal acyl-coenzyme A oxidase 1	Acox1	acyl-CoA oxidase 1, palmitoyl
IPI00373181.3	15	8	0	5	1_1_0_1_	3	10116 - Actl6a Actin-like 6A	Actl6a	actin-like 6A
IPI00202761.2	14	0	4	4	1_0_1_1_	3	10116 - Adnp activity-dependent neuroprotector homeobox protein	Adnp	activity-dependent neuroprotector homeobox
IPI00393676.1	0	3	2	3	0_1_1_1_	3	10116 - Ahctf1 similar to transcription factor ELYS	Ahctf1	AT hook containing transcription factor 1
IPI00204118.1	4	6	8	0	1_1_1_0_	3	10116 - Aifm1 Apoptosis-inducing factor 1, mitochondrial	Aifm1	apoptosis-inducing factor, mitochondrion-associated, 1
IPI00204794.1	4	0	1	2	1_0_1_1_	3	10116 - Anapc4 anaphase promoting complex subunit 4	Anapc4	anaphase promoting complex subunit 4
IPI00777179.1	4	0	2	3	1_0_1_1_	3	10116 - Anxa1 44 kDa protein	Anxa1	annexin A1
IPI00364621.2	4	6	2	3	1_1_1_1_	4	10116 - Anxa11 Annexin A11	Anxa11	annexin A11
IPI00205068.3	10	0	9	5	1_0_1_1_	3	10116 - Ap1b1 105 kDa protein	Ap1b1	adaptor-related protein complex 1, beta 1 subunit
IPI00781585.1	7	4	7	4	1_1_1_1_	4	10116 - Ap1b1 Isoform A of AP-1 complex subunit beta-1	Ap1b1	adaptor-related protein complex 1, beta 1 subunit
IPI00231502.3	10	0	7	3	1_0_1_1_	3	10116 - Ap2b1 Isoform 2 of AP-2 complex subunit beta	Ap2b1	adaptor-related protein complex 2, beta 1 subunit
IPI00211996.1	0	1	1	1	0_1_1_1_	3	10116 - Ap3m1 AP-3 complex subunit mu-1	Ap3m1	adaptor-related protein complex 3, mu 1 subunit
IPI00368776.5	15	0	10	9	1_0_1_1_	3	10116 - Aqr Aquarius (Predicted), isoform CRA_a	Aqr	aquarius homolog (mouse)
IPI00196410.3	2	0	1	1	1_0_1_1_	3	10116 - Ard1b N-terminal acetyltransferase complex ARD1 subunit homolog B	Ard1b	ARD1 homolog B (S. cerevisiae)
IPI00831742.1	2	0	1	2	1_0_1_1_	3	10116 - Arhgap17 Isoform 1 of Rho GTPase-activating protein 17	Arhgap17	Rho GTPase activating protein 17
IPI00368617.2	6	6	0	2	1_1_0_1_	3	10116 - Arhgef2 Rho guanine nucleotide exchange factor 2	Arhgef2	Rho/Rac guanine nucleotide exchange factor (GEF) 2
IPI00370175.3	5	2	2	4	1_1_1_1_	4	10116 - Arid2 similar to AT rich interactive domain 2	Arid2	AT rich interactive domain 2 (ARID, RFX-like)
IPI00764535.2	8	0	5	4	1_0_1_1_	3	10116 - Arpc2 Actin-related protein 2/3 complex subunit 2	Arpc2	actin related protein 2/3 complex, subunit 2, 34kDa
IPI00562876.1	84	0	59	69	1_0_1_1_	3	10116 - Ascc3l1 Ascc3l1 protein	Ascc3l1	activating signal cointegrator 1 complex subunit 3-like 1
IPI00326305.3	0	11	9	2	0_1_1_1_	3	10116 - Atp1a1 Sodium/potassium-transporting ATPase subunit alpha-1	Atp1a1	ATPase, Na+/K+ transporting, alpha 1 polypeptide
IPI00551812.1	25	21	26	19	1_1_1_1_	4	10116 - Atp5b ATP synthase subunit beta, mitochondrial	Atp5b	ATP synthase, H+ transporting, mitochondrial F1 complex, beta polypeptide
IPI00454288.1	0	2	2	1	0_1_1_1_	3	10116 - Atp5c1 ATP synthase gamma chain	Atp5c1	ATP synthase, H+ transporting, mitochondrial F1 complex, gamma polypeptide 1
IPI00370333.1	25	25	17	11	1_1_1_1_	4	10116 - Baz1b similar to Bromodomain adjacent to zinc finger domain protein 1B	Baz1b	bromodomain adjacent to zinc finger domain, 1B
IPI00196325.3	0	1	1	2	0_1_1_1_	3	10116 - Bcl7c B-cell CLL/lymphoma 7C	Bcl7c	B-cell CLL/lymphoma 7C
IPI00567915.3	9	4	0	7	1_1_0_1_	3	10116 - Bclaf1 Bclaf1 protein	Bclaf1	BCL2-associated transcription factor 1
IPI00365971.4	4	1	3	0	1_1_1_0_	3	10116 - Brd4 bromodomain containing 4	Brd4	bromodomain containing 4
IPI00951729.1	0	2	2	1	0_1_1_1_	3	10116 - Brpf1 similar to bromodomain and PHD finger-containing protein 1 isoform 1	Brpf1	bromodomain and PHD finger containing, 1
IPI00371948.1	0	5	4	6	0_1_1_1_	3	10116 - Bxdc1 RCG19961, isoform CRA_b	Bxdc1	brix domain containing 1
IPI00203352.1	8	6	6	3	1_1_1_1_	4	10116 - Bzw2 Basic leucine zipper and W2 domain-containing protein 2	Bzw2	basic leucine zipper and W2 domains 2
IPI00361686.5	2	1	1	0	1_1_1_0_	3	10116 - C1qbp Complement component 1 Q subcomponent-binding protein, mitochondrial	C1qbp	complement component 1, q subcomponent binding protein
IPI00422037.1	3	1	3	1	1_1_1_1_	4	10116 - C4-2 complement component 4, gene 2	C4-2	complement component 4, gene 2
IPI00198191.2	3	0	3	2	1_0_1_1_	3	10116 - Cacybp Calcyclin-binding protein	Cacybp	calcyclin binding protein
IPI00555187.2	2	6	6	0	1_1_1_0_	3	10116 - Cap1 Adenylyl cyclase-associated protein 1	Cap1	CAP, adenylate cyclase-associated protein 1 (yeast)
IPI00388249.3	3	0	5	2	1_0_1_1_	3	10116 - Capn2 Calpain-2 catalytic subunit	Capn2	calpain 2
IPI00948378.1	4	3	3	0	1_1_1_0_	3	10116 - Capza1 33 kDa protein	Capza1	capping protein (actin filament) muscle Z-line, alpha 1
IPI00371408.2	3	1	0	1	1_1_0_1_	3	10116 - Cars 95 kDa protein	Cars	cysteinyl-tRNA synthetase
IPI00948791.1	1	1	1	0	1_1_1_0_	3	10116 - Cask 105 kDa protein	Cask	calcium/calmodulin-dependent serine protein kinase (MAGUK family)
IPI00203647.1	7	2	6	4	1_1_1_1_	4	10116 - Ccdc47 Coiled-coil domain-containing protein 47	Ccdc47	coiled-coil domain containing 47
IPI00366218.3	12	12	18	9	1_1_1_1_	4	10116 - Cct2 T-complex protein 1 subunit beta	Cct2	chaperonin containing TCP1, subunit 2 (beta)
IPI00372388.1	10	0	19	8	1_0_1_1_	3	10116 - Cct3 T-complex protein 1 subunit gamma	Cct3	chaperonin containing TCP1, subunit 3 (gamma)
IPI00337168.5	10	13	13	7	1_1_1_1_	4	10116 - Cct4 T-complex protein 1 subunit delta	Cct4	chaperonin containing TCP1, subunit 4 (delta)
IPI00470301.1	10	10	18	8	1_1_1_1_	4	10116 - Cct5 T-complex protein 1 subunit epsilon	Cct5	chaperonin containing TCP1, subunit 5 (epsilon)
IPI00188111.1	5	10	12	0	1_1_1_0_	3	10116 - Cct6a Chaperonin subunit 6a	Cct6a	chaperonin containing TCP1, subunit 6A (zeta 1)
IPI00364286.3	11	0	16	8	1_0_1_1_	3	10116 - Cct7 chaperonin containing Tcp1, subunit 7	Cct7	chaperonin containing TCP1, subunit 7 (eta)
IPI00370815.4	7	17	25	0	1_1_1_0_	3	10116 - Cct8 chaperonin containing Tcp1, subunit 8	Cct8	chaperonin containing TCP1, subunit 8 (theta)
IPI00214452.2	3	3	1	3	1_1_1_1_	4	10116 - Cdk105 Ribosome biogenesis protein NSA2 homolog	Cdk105	CDK105 protein
IPI00201281.1	3	1	3	2	1_1_1_1_	4	10116 - Cebpb CCAAT/enhancer-binding protein beta	Cebpb	CCAAT/enhancer binding protein (C/EBP), beta
IPI00365553.4	12	8	4	7	1_1_1_1_	4	10116 - Cebpz CCAAT/enhancer binding protein zeta	Cebpz	CCAAT/enhancer binding protein (C/EBP), zeta
IPI00949811.1	2	0	3	4	1_0_1_1_	3	10116 - Cetn2 19 kDa protein	Cetn2	centrin 2
IPI00951963.1	2	5	5	2	1_1_1_1_	4	10116 - Cfl1 24 kDa protein	Cfl1	cofilin 1, non-muscle
IPI00767719.1	5	3	5	0	1_1_1_0_	3	10116 - Chd1 chromodomain helicase DNA binding protein 1	Chd1	chromodomain helicase DNA binding protein 1
IPI00365698.2	63	40	0	38	1_1_0_1_	3	10116 - Chd4 similar to chromodomain helicase DNA binding protein 4	Chd4	chromodomain helicase DNA binding protein 4
IPI00766481.1	60	40	0	36	1_1_0_1_	3	10116 - Chd4 similar to chromodomain helicase DNA binding protein 4	Chd4	chromodomain helicase DNA binding protein 4
IPI00362613.2	5	0	1	4	1_0_1_1_	3	10116 - Cherp calcium homeostasis endoplasmic reticulum protein	Cherp	calcium homeostasis endoplasmic reticulum protein
IPI00201031.5	5	2	0	2	1_1_0_1_	3	10116 - Cirbp Cold-inducible RNA-binding protein	Cirbp	cold inducible RNA binding protein
IPI00764540.1	25	17	13	11	1_1_1_1_	4	10116 - Ckap5 similar to cytoskeleton associated protein 5 isoform 3	Ckap5	cytoskeleton associated protein 5
IPI00421995.1	0	2	4	3	0_1_1_1_	3	10116 - Clic1 Chloride intracellular channel protein 1	Clic1	chloride intracellular channel 1
IPI00205776.6	4	0	2	2	1_0_1_1_	3	10116 - Clk3 74 kDa protein	Clk3	CDC-like kinase 3
IPI00359049.4	5	2	6	2	1_1_1_1_	4	10116 - Cnot1, RGD1308009 hypothetical protein LOC291841	Cnot1	CCR4-NOT transcription complex, subunit 1
IPI00210280.1	2	2	2	1	1_1_1_1_	4	10116 - Comt Isoform 1 of Catechol O-methyltransferase	Comt	catechol-O-methyltransferase
IPI00211812.1	0	6	9	1	0_1_1_1_	3	10116 - Copb1 Coatomer subunit beta	Copb1	coatomer protein complex, subunit beta 1
IPI00388015.3	10	0	10	4	1_0_1_1_	3	10116 - Coro1c coronin, actin binding protein 1C	Coro1c	coronin, actin binding protein, 1C
IPI00361315.3	1	1	2	0	1_1_1_0_	3	10116 - Cox15 COX15 homolog	Cox15	COX15 homolog, cytochrome c oxidase assembly protein (yeast)
IPI00365532.3	3	1	1	1	1_1_1_1_	4	10116 - Cpsf3 Cleavage and polyadenylation specificity factor 3	Cpsf3	cleavage and polyadenylation specificity factor 3
IPI00569900.2	6	2	4	0	1_1_1_0_	3	10116 - Crkrs Isoform 1 of Cell division protein kinase 12	Crkrs	Cdc2-related kinase, arginine/serine-rich
IPI00392657.1	3	2	4	2	1_1_1_1_	4	10116 - Ctbp1 48 kDa protein	Ctbp1	C-terminal binding protein 1
IPI00189984.1	2	3	0	2	1_1_0_1_	3	10116 - Ctbp2 Isoform 2 of C-terminal-binding protein 2	Ctbp2	C-terminal binding protein 2
IPI00207172.2	6	1	3	5	1_1_1_1_	4	10116 - Ctcf Transcriptional repressor CTCF	Ctcf	CCCTC-binding factor (zinc finger protein)
IPI00948231.1	16	15	18	13	1_1_1_1_	4	10116 - Ctnnd1 105 kDa protein	Ctnnd1	catenin (cadherin-associated protein), delta 1
IPI00371679.4	6	3	4	1	1_1_1_1_	4	10116 - Ctr9 Ctr9, Paf1/RNA polymerase II complex component, homolog	Ctr9	Ctr9, Paf1/RNA polymerase II complex component, homolog (S. cerevisiae)
IPI00212811.1	1	0	1	1	1_0_1_1_	3	10116 - Ctsb Cathepsin B	Ctsb	cathepsin B
IPI00364684.5	7	0	3	6	1_0_1_1_	3	10116 - Cul4a, RGD1563853 RGD1563853 protein	Cul4a	cullin 4A
IPI00760146.1	0	7	10	4	0_1_1_1_	3	10116 - Cyb5r3 Isoform 2 of NADH-cytochrome b5 reductase 3	Cyb5r3	cytochrome b5 reductase 3
IPI00366416.2	5	2	1	0	1_1_1_0_	3	10116 - Cyc1 cytochrome c-1	Cyc1	cytochrome c-1
IPI00231864.5	8	0	7	6	1_0_1_1_	3	10116 - Cycs Cytochrome c, somatic	Cycs	cytochrome c, somatic
IPI00949887.1	3	0	4	3	1_0_1_1_	3	10116 - Specc1l 126 kDa protein	Cytsa	cytospin A
IPI00206224.1	3	5	4	0	1_1_1_0_	3	10116 - Dars Aspartyl-tRNA synthetase, cytoplasmic	Dars	aspartyl-tRNA synthetase
IPI00231407.4	4	2	1	0	1_1_1_0_	3	10116 - Dbn1 Isoform A of Drebrin	Dbn1	drebrin 1
IPI00393552.2	5	3	3	3	1_1_1_1_	4	10116 - DCAF13, Wdsof1 similar to WD repeats and SOF domain containing 1	Dcaf13	DDB1 and CUL4 associated factor 13
IPI00372938.1	0	2	3	2	0_1_1_1_	3	10116 - Dcakd Dephospho-CoA kinase domain-containing protein	Dcakd	dephospho-CoA kinase domain containing
IPI00555314.1	17	14	13	15	1_1_1_1_	4	10116 - Ddx1 ATP-dependent RNA helicase DDX1	Ddx1	DEAD (Asp-Glu-Ala-Asp) box polypeptide 1
IPI00373041.3	10	8	0	10	1_1_0_1_	3	10116 - Ddx23 DEAD (Asp-Glu-Ala-Asp) box polypeptide 23	Ddx23	DEAD (Asp-Glu-Ala-Asp) box polypeptide 23
IPI00362534.3	29	20	0	15	1_1_0_1_	3	10116 - Ddx3x DEAD (Asp-Glu-Ala-Asp) box polypeptide 3, X-linked	Ddx3x	DEAD (Asp-Glu-Ala-Asp) box polypeptide 3, X-linked
IPI00364587.2	12	9	8	10	1_1_1_1_	4	10116 - Ddx47 DEAD (Asp-Glu-Ala-Asp) box polypeptide 47	Ddx47	DEAD (Asp-Glu-Ala-Asp) box polypeptide 47
IPI00464718.1	49	45	39	44	1_1_1_1_	4	10116 - Ddx5 Ddx5	Ddx5	DEAD (Asp-Glu-Ala-Asp) box polypeptide 5
IPI00214599.2	8	0	1	5	1_0_1_1_	3	10116 - Ddx50 DEAD (Asp-Glu-Ala-Asp) box polypeptide 50	Ddx50	DEAD (Asp-Glu-Ala-Asp) box polypeptide 50
IPI00361885.3	8	6	5	6	1_1_1_1_	4	10116 - Ddx56 61 kDa protein	Ddx56	DEAD (Asp-Glu-Ala-Asp) box polypeptide 56
IPI00365999.1	20	13	8	0	1_1_1_0_	3	10116 - Dek Protein DEK	Dek	DEK oncogene
IPI00361832.1	17	11	17	15	1_1_1_1_	4	10116 - Dhx15 similar to Putative pre-mRNA-splicing factor ATP-dependent RNA helicase DHX15	Dhx15	DEAH (Asp-Glu-Ala-His) box polypeptide 15
IPI00391385.3	11	0	7	6	1_0_1_1_	3	10116 - Dhx37 129 kDa protein	Dhx37	DEAH (Asp-Glu-Ala-His) box polypeptide 37
IPI00366249.5	59	35	0	44	1_1_0_1_	3	10116 - Dhx9 150 kDa protein	Dhx9	DEAH (Asp-Glu-Ala-His) box polypeptide 9
IPI00372021.4	8	0	4	1	1_0_1_1_	3	10116 - Dimt1l DIM1 dimethyladenosine transferase 1-like	Dimt1l	DIM1 dimethyladenosine transferase 1-like (S. cerevisiae)
IPI00767543.3	8	0	7	5	1_0_1_1_	3	10116 - Dis3 Dis3 protein	Dis3	DIS3 mitotic control homolog (S. cerevisiae)
IPI00765153.1	2	0	6	3	1_0_1_1_	3	10116 - Dlat similar to dihydrolipoamide S-acetyltransferase	Dlat	dihydrolipoamide S-acetyltransferase
IPI00551702.2	0	3	2	1	0_1_1_1_	3	10116 - Dlst Dihydrolipoyllysine-residue succinyltransferase component of 2-oxoglutarate dehydrogenase complex, mitochondrial	Dlst	dihydrolipoamide S-succinyltransferase (E2 component of 2-oxo-glutarate complex)
IPI00192736.1	0	1	2	1	0_1_1_1_	3	10116 - Drg1 Developmentally regulated GTP binding protein 1	Drg1	developmentally regulated GTP binding protein 1
IPI00327630.1	55	62	44	26	1_1_1_1_	4	10116 - Dync1h1 Cytoplasmic dynein 1 heavy chain 1	Dync1h1	dynein cytoplasmic 1 heavy chain 1
IPI00213552.1	3	3	3	3	1_1_1_1_	4	10116 - Dync1li1 Cytoplasmic dynein 1 light intermediate chain 1	Dync1li1	dynein cytoplasmic 1 light intermediate chain 1
IPI00207202.1	2	0	2	1	1_0_1_1_	3	10116 - Dync1li2 Cytoplasmic dynein 1 light intermediate chain 2	Dync1li2	dynein, cytoplasmic 1 light intermediate chain 2
IPI00210257.1	1	2	0	1	1_1_0_1_	3	10116 - Dynlt1 Dynein light chain Tctex-type 1	Dynlt1	dynein light chain Tctex-type 1
IPI00207217.1	2	2	3	3	1_1_1_1_	4	10116 - Echs1 Enoyl-CoA hydratase, mitochondrial	Echs1	enoyl Coenzyme A hydratase, short chain, 1, mitochondrial
IPI00476899.1	3	8	2	4	1_1_1_1_	4	10116 - Eef1b2 Eukaryotic translation elongation factor 1 beta 2	Eef1b2	eukaryotic translation elongation factor 1 beta 2
IPI00471525.2	5	6	9	4	1_1_1_1_	4	10116 - Eef1d Isoform 2 of Elongation factor 1-delta	Eef1d	eukaryotic translation elongation factor 1 delta (guanine nucleotide exchange protein)
IPI00470317.5	13	0	17	8	1_0_1_1_	3	10116 - Eef1g Elongation factor 1-gamma	Eef1g	eukaryotic translation elongation factor 1 gamma
IPI00370117.3	47	0	35	35	1_0_1_1_	3	10116 - Eftud2 similar to 116 kDa U5 small nuclear ribonucleoprotein component	Eftud2	elongation factor Tu GTP binding domain containing 2
IPI00200271.1	6	0	16	8	1_0_1_1_	3	10116 - Ehd4 Pincher	Ehd4	EH-domain containing 4
IPI00370011.2	4	0	4	4	1_0_1_1_	3	10116 - Eif1 RCG33041, isoform CRA_b	Eif1	eukaryotic translation initiation factor 1
IPI00373164.1	5	7	0	6	1_1_0_1_	3	10116 - Eif2s2 Eukaryotic translation initiation factor 2, subunit 2	Eif2s2	eukaryotic translation initiation factor 2, subunit 2 beta
IPI00372810.5	15	17	29	12	1_1_1_1_	4	10116 - EIF3A Eukaryotic translation initiation factor 3 subunit A	Eif3A	eukaryotic translation initiation factor 3, subunit A
IPI00366292.1	3	5	0	2	1_1_0_1_	3	10116 - Eif3d Eukaryotic translation initiation factor 3 subunit D	Eif3d	eukaryotic translation initiation factor 3, subunit D
IPI00193595.3	9	0	11	6	1_0_1_1_	3	10116 - Eif4a2 Eukaryotic initiation factor 4A-II	Eif4a2	eukaryotic translation initiation factor 4A2
IPI00869767.1	6	6	8	9	1_1_1_1_	4	10116 - Elavl1 ELAV (Embryonic lethal, abnormal vision, Drosophila)-like 1 (Hu antigen R) (Predicted), isoform CRA_a	Elavl1	ELAV (embryonic lethal, abnormal vision, Drosophila)-like 1 (Hu antigen R)
IPI00192021.1	5	2	2	0	1_1_1_0_	3	10116 - Emg1 EMG1 nucleolar protein homolog	Emg1	EMG1 nucleolar protein homolog (S. cerevisiae)
IPI00421357.3	8	0	11	4	1_0_1_1_	3	10116 - Eprs 170 kDa protein	Eprs	glutamyl-prolyl-tRNA synthetase
IPI00870566.1	4	3	5	4	1_1_1_1_	4	10116 - Erh enhancer of rudimentary homolog	Erh	enhancer of rudimentary homolog (Drosophila)
IPI00209291.1	12	7	11	0	1_1_1_0_	3	10116 - Esyt1 Extended synaptotagmin-1	Esyt1	extended synaptotagmin-like protein 1
IPI00358404.4	9	3	10	9	1_1_1_1_	4	10116 - Etf1 Eukaryotic peptide chain release factor subunit 1	Etf1	eukaryotic translation termination factor 1
IPI00366418.3	2	0	1	1	1_0_1_1_	3	10116 - Exosc4 exosome component 4	Exosc4	exosome component 4
IPI00201730.1	1	0	1	2	1_0_1_1_	3	10116 - Exosc5 exosome component 5	Exosc5	exosome component 5
IPI00470254.4	17	7	16	10	1_1_1_1_	4	10116 - Ezr Ezrin	Ezr	ezrin
IPI00565909.1	3	0	3	1	1_0_1_1_	3	10116 - Fam98b similar to family with sequence similarity 98, member B	Fam98b	family with sequence similarity 98, member B
IPI00370411.2	1	3	2	0	1_1_1_0_	3	10116 - Fbln1 fibulin 1	Fbln1	fibulin 1
IPI00190759.2	1	0	1	1	1_0_1_1_	3	10116 - Fgg Isoform Gamma-B of Fibrinogen gamma chain	Fgg	fibrinogen gamma chain
IPI00198310.3	2	0	4	5	1_0_1_1_	3	10116 - Fkbp11 FK506 binding protein 11	Fkbp11	FK506 binding protein 11
IPI00767393.1	6	0	7	4	1_0_1_1_	3	10116 - Fkbp4 similar to FK506-binding protein 4	Fkbp4	FK506 binding protein 4
IPI00362623.1	4	2	2	2	1_1_1_1_	4	10116 - Fkbp8 Peptidyl-prolyl cis-trans isomerase FKBP8	Fkbp8	FK506 binding protein 8
IPI00951791.1	87	0	70	42	1_0_1_1_	3	10116 - Flna Filamin, alpha (Predicted), isoform CRA_a	Flna	filamin A, alpha
IPI00373752.3	23	7	16	0	1_1_1_0_	3	10116 - Flnb 278 kDa protein	Flnb	filamin, beta
IPI00763801.1	4	0	3	1	1_0_1_1_	3	10116 - Flywch1 similar to FLYWCH-type zinc finger 1	Flywch1	FLYWCH-type zinc finger 1
IPI00187901.1	5	3	3	2	1_1_1_1_	4	10116 - Fosl1 Fos-related antigen 1	Fosl1	fos-like antigen 1
IPI00555252.3	26	37	31	28	1_1_1_1_	4	10116 - Gapdh;LOC685186;LOC682005 Glyceraldehyde-3-phosphate dehydrogenase	Gapdh	glyceraldehyde-3-phosphate dehydrogenase
IPI00766072.1	4	0	12	5	1_0_1_1_	3	10116 - Gars similar to glycyl-tRNA synthetase	Gars	glycyl-tRNA synthetase
IPI00370787.1	4	4	7	2	1_1_1_1_	4	10116 - Gart phosphoribosylglycinamide formyltransferase	Gart	phosphoribosylglycinamide formyltransferase
IPI00200873.6	2	0	1	2	1_0_1_1_	3	10116 - Gatad1 similar to ocular development associated gene	Gatad1	GATA zinc finger domain containing 1
IPI00362615.2	4	0	4	4	1_0_1_1_	3	10116 - Gatad2a p66 alpha	Gatad2a	GATA zinc finger domain containing 2A
IPI00767139.1	26	12	17	10	1_1_1_1_	4	10116 - Gcn1l1 GCN1 general control of amino-acid synthesis 1-like 1	Gcn1l1	GCN1 general control of amino-acid synthesis 1-like 1 (yeast)
IPI00767611.1	2	1	3	1	1_1_1_1_	4	10116 - Gemin4 gem (nuclear organelle) associated protein 4	Gemin4	gem (nuclear organelle) associated protein 4
IPI00200610.2	9	7	9	0	1_1_1_0_	3	10116 - Gfm1 Elongation factor G, mitochondrial	Gfm1	G elongation factor, mitochondrial 1
IPI00553899.1	2	0	2	2	1_0_1_1_	3	10116 - Glrx3 Isoform 1 of Glutaredoxin-3	Glrx3	glutaredoxin 3
IPI00569357.1	3	5	5	0	1_1_1_0_	3	10116 - Glt25d1 Glycosyltransferase 25 domain containing 1	Glt25d1	glycosyltransferase 25 domain containing 1
IPI00324633.2	9	8	6	0	1_1_1_0_	3	10116 - Glud1 Glutamate dehydrogenase 1, mitochondrial	Glud1	glutamate dehydrogenase 1
IPI00780105.1	5	4	0	4	1_1_0_1_	3	10116 - Gmps 78 kDa protein	Gmps	guanine monphosphate synthetase
IPI00331789.1	3	2	0	2	1_1_0_1_	3	10116 - Gnl3 Guanine nucleotide-binding protein-like 3	Gnl3	guanine nucleotide binding protein-like 3 (nucleolar)
IPI00194930.5	2	3	1	0	1_1_1_0_	3	10116 - Gpc1 Glypican-1	Gpc1	glypican 1
IPI00363974.3	3	3	5	0	1_1_1_0_	3	10116 - Gsn Isoform 1 of Gelsolin	Gsn	gelsolin
IPI00208636.3	2	0	2	3	1_0_1_1_	3	10116 - Gstm5 Glutathione S-transferase Mu 5	Gstm5	glutathione S-transferase, mu 5
IPI00231229.9	2	5	6	0	1_1_1_0_	3	10116 - Gstp1 Glutathione S-transferase P	Gstp1	glutathione S-transferase pi 1
IPI00368730.2	6	2	3	2	1_1_1_1_	4	10116 - Gtf3c2 General transcription factor IIIC, polypeptide 2, beta	Gtf3c2	general transcription factor IIIC, polypeptide 2, beta
IPI00366437.6	0	3	4	2	0_1_1_1_	3	10116 - Gtpbp1 GTP binding protein 1 (Predicted), isoform CRA_a	Gtpbp1	GTP binding protein 1
IPI00388599.1	2	3	2	1	1_1_1_1_	4	10116 - H1fx similar to H1 histone family, member X	H1fx	H1 histone family, member X
IPI00369397.5	0	10	24	28	0_1_1_1_	3	10116 - H2afx H2A histone family, member X	H2afx	H2A histone family, member X
IPI00205157.1	3	3	4	5	1_1_1_1_	4	10116 - Hadh Hydroxyacyl-coenzyme A dehydrogenase, mitochondrial	Hadh	hydroxyacyl-Coenzyme A dehydrogenase
IPI00198467.1	0	3	10	2	0_1_1_1_	3	10116 - Hadhb Trifunctional enzyme subunit beta, mitochondrial	Hadhb	hydroxyacyl-Coenzyme A dehydrogenase/3-ketoacyl-Coenzyme A thiolase/enoyl-Coenzyme A hydratase (trifunctional protein), beta subunit
IPI00562572.1	0	1	2	1	0_1_1_1_	3	10116 - Hars2l histidyl-tRNA synthetase 2-like	Hars2l	histidyl-tRNA synthetase 2-like
IPI00765252.1	21	17	20	10	1_1_1_1_	4	10116 - Hcfc1 similar to host cell factor C1	Hcfc1	host cell factor C1
IPI00364914.3	17	4	11	14	1_1_1_1_	4	10116 - Heatr1 HEAT repeat containing 1	Heatr1	HEAT repeat containing 1
IPI00365160.3	1	2	2	1	1_1_1_1_	4	10116 - Heatr3 similar to CG10286-PA	Heatr3	HEAT repeat containing 3
IPI00768565.1	10	3	7	0	1_1_1_0_	3	10116 - Hells helicase, lymphoid specific	Hells	helicase, lymphoid specific
IPI00231974.5	33	0	14	22	1_0_1_1_	3	10116 - Hist1h2aa Histone H2A type 4	Hist1h2aa	histone cluster 1, H2aa
IPI00206626.1	5	3	7	0	1_1_1_0_	3	10116 - Hmox1 Heme oxygenase 1	Hmox1	heme oxygenase (decycling) 1
IPI00212969.3	0	12	24	24	0_1_1_1_	3	10116 - Hnrnpa2b1 Isoform B0b of Heterogeneous nuclear ribonucleoproteins A2/B1	Hnrnpa2b1	heterogeneous nuclear ribonucleoprotein A2/B1
IPI00382376.1	24	17	0	31	1_1_0_1_	3	10116 - Hnrnpa3 Isoform 1 of Heterogeneous nuclear ribonucleoprotein A3	Hnrnpa3	heterogeneous nuclear ribonucleoprotein A3
IPI00210357.1	9	0	9	7	1_0_1_1_	3	10116 - Hnrnpf Heterogeneous nuclear ribonucleoprotein F	Hnrnpf	heterogeneous nuclear ribonucleoprotein F
IPI00464512.1	0	11	8	5	0_1_1_1_	3	10116 - Hnrnph2 Heterogeneous nuclear ribonucleoprotein H2	Hnrnph2	heterogeneous nuclear ribonucleoprotein H2 (H')
IPI00194974.2	14	15	17	14	1_1_1_1_	4	10116 - Hnrnpk Hnrpk protein	Hnrnpk	heterogeneous nuclear ribonucleoprotein K
IPI00765134.1	15	13	20	15	1_1_1_1_	4	10116 - Hnrnpl heterogeneous nuclear ribonucleoprotein L isoform a	Hnrnpl	heterogeneous nuclear ribonucleoprotein L
IPI00210090.3	0	30	36	42	0_1_1_1_	3	10116 - Hnrnpu SP120	Hnrnpu	heterogeneous nuclear ribonucleoprotein U
IPI00360055.3	5	2	10	7	1_1_1_1_	4	10116 - Hnrpll similar to Heterogeneous nuclear ribonucleoprotein L-like	Hnrpll	heterogeneous nuclear ribonucleoprotein L-like
IPI00876603.1	31	36	29	20	1_1_1_1_	4	10116 - Hnrnpm heterogeneous nuclear ribonucleoprotein M isoform a	Hnrpm	heterogeneous nuclear ribonucleoprotein M
IPI00400578.1	12	8	11	0	1_1_1_0_	3	10116 - Hp1bp3 Heterochromatin protein 1-binding protein 3	Hp1bp3	heterochromatin protein 1, binding protein 3
IPI00569001.1	3	0	3	3	1_0_1_1_	3	10116 - Hsd17b12 estradiol 17-beta-dehydrogenase 12	Hsd17b12	hydroxysteroid (17-beta) dehydrogenase 12
IPI00210566.3	36	31	51	27	1_1_1_1_	4	10116 - Hsp90aa1 Heat shock protein HSP 90-alpha	Hsp90aa1	heat shock protein 90, alpha (cytosolic), class A member 1
IPI00365985.5	10	24	0	7	1_1_0_1_	3	10116 - HSP90B1, Tra1 Isoform 1 of Endoplasmin	Hsp90b1	heat shock protein 90kDa beta (Grp94), member 1
IPI00339148.2	6	10	14	1	1_1_1_1_	4	10116 - Hspd1 60 kDa heat shock protein, mitochondrial	Hspd1	heat shock protein 1 (chaperonin)
IPI00210360.3	8	0	2	2	1_0_1_1_	3	10116 - Hspg2 394 kDa protein	Hspg2	heparan sulfate proteoglycan 2
IPI00365783.5	3	3	0	2	1_1_0_1_	3	10116 - Iars isoleucine tRNA synthetase	Iars	isoleucyl-tRNA synthetase
IPI00948284.1	4	11	9	12	1_1_1_1_	4	10116 - Ilf3 98 kDa protein	Ilf3	interleukin enhancer binding factor 3
IPI00421373.1	3	0	2	1	1_0_1_1_	3	10116 - Imp4 LRRGT00017	Imp4	IMP4, U3 small nucleolar ribonucleoprotein, homolog (yeast)
IPI00421624.1	17	5	7	0	1_1_1_0_	3	10116 - Impdh2 Inosine-5'-monophosphate dehydrogenase	Impdh2	IMP (inosine monophosphate) dehydrogenase 2
IPI00371472.4	0	3	4	4	0_1_1_1_	3	10116 - Incenp inner centromere protein	Incenp	inner centromere protein
IPI00464711.1	1	0	1	1	1_0_1_1_	3	10116 - Ino80e INO80 complex subunit E	Ino80e	INO80 complex subunit E
IPI00368440.2	9	2	0	2	1_1_0_1_	3	10116 - Ints4 similar to integrator complex subunit 4	Ints4	integrator complex subunit 4
IPI00764863.1	4	2	3	0	1_1_1_0_	3	10116 - Ints7 similar to integrator complex subunit 7 isoform 2	Ints7	integrator complex subunit 7
IPI00212167.5	3	0	3	1	1_0_1_1_	3	10116 - - 32 kDa protein	IPI00212167.5
IPI00361815.3	8	15	12	7	1_1_1_1_	4	10116 - - 33 kDa protein	IPI00361815.3
IPI00367441.3	20	21	14	15	1_1_1_1_	4	10116 - - 50 kDa protein	IPI00367441.3
IPI00371000.4	9	0	4	6	1_0_1_1_	3	10116 - INTS1	IPI00371000.4
IPI00392830.3	19	14	25	15	1_1_1_1_	4	10116 - - 77 kDa protein	IPI00392830.3
IPI00475530.4	8	5	0	3	1_1_0_1_	3	10116 - - 46 kDa protein	IPI00475530.4
IPI00476722.3	15	0	12	15	1_0_1_1_	3	10116 - - 15 kDa protein	IPI00476722
IPI00557114.2	8	9	8	0	1_1_1_0_	3	10116 - - 35 kDa protein	IPI00557114.2
IPI00557715.2	10	0	17	12	1_0_1_1_	3	10116 - - 46 kDa protein	IPI00557715.2
IPI00559057.2	5	9	7	6	1_1_1_1_	4	10116 - - 34 kDa protein	IPI00559057.2
IPI00561918.2	10	0	7	7	1_0_1_1_	3	10116 - - 34 kDa protein	IPI00561918.2
IPI00563746.1	4	9	10	0	1_1_1_0_	3	10116 - - 34 kDa protein	IPI00563746.1
IPI00564052.2	3	3	3	2	1_1_1_1_	4	10116 - - 19 kDa protein	IPI00564052.2
IPI00568454.2	7	11	10	0	1_1_1_0_	3	10116 - - 24 kDa protein	IPI00568454.2
IPI00568873.2	0	3	4	3	0_1_1_1_	3	10116 - - 20 kDa protein	IPI00568873
IPI00768666.1	0	2	2	3	0_1_1_1_	3	10116 - - similar to Ras-related protein Rab-1B	IPI00768666
IPI00779086.2	4	3	7	6	1_1_1_1_	4	10116 - - 21 kDa protein	IPI00779086.2
IPI00206234.3	11	10	12	1	1_1_1_1_	4	10116 - Ipo7 importin 7	Ipo7	importin 7
IPI00195818.3	3	0	4	3	1_0_1_1_	3	10116 - Ipo9 importin 9	Ipo9	importin 9
IPI00190129.2	4	1	4	2	1_1_1_1_	4	10116 - Junb Transcription factor jun-B	Junb	jun B proto-oncogene
IPI00560366.2	3	3	2	1	1_1_1_1_	4	10116 - Kars Lysyl-tRNA synthetase	Kars	lysyl-tRNA synthetase
IPI00766509.1	18	13	9	6	1_1_1_1_	4	10116 - Kif11 kinesin family member 11	Kif11	kinesin family member 11
IPI00779823.2	5	0	1	2	1_0_1_1_	3	10116 - Kif20b 203 kDa protein	Kif20b	kinesin family member 20B
IPI00207940.2	5	8	9	4	1_1_1_1_	4	10116 - Kpna2 RCG35559, isoform CRA_a	Kpna2	karyopherin alpha 2 (RAG cohort 1, importin alpha 1)
IPI00359040.3	10	3	7	5	1_1_1_1_	4	10116 - Kpna6 Karyopherin alpha 6	Kpna6	karyopherin alpha 6 (importin alpha 7)
IPI00190577.4	7	0	3	6	1_0_1_1_	3	10116 - Lama5 similar to Laminin alpha-5 chain precursor	Lama5	laminin, alpha 5
IPI00364015.3	4	1	2	2	1_1_1_1_	4	10116 - Las1l LAS1-like	Las1l	LAS1-like (S. cerevisiae)
IPI00324991.3	4	4	4	1	1_1_1_1_	4	10116 - Lbr Lamin-B receptor	Lbr	lamin B receptor
IPI00364777.1	2	4	0	2	1_1_0_1_	3	10116 - Letm1 LETM1 and EF-hand domain-containing protein 1, mitochondrial	Letm1	leucine zipper-EF-hand containing transmembrane protein 1
IPI00231275.7	2	1	3	0	1_1_1_0_	3	10116 - Lgals1 Galectin-1	Lgals1	lectin, galactoside-binding, soluble, 1
IPI00200072.1	6	6	2	4	1_1_1_1_	4	10116 - Lig1 DNA ligase 1	Lig1	ligase I, DNA, ATP-dependent
IPI00201060.4	43	44	48	49	1_1_1_1_	4	10116 - Lmna Lamin-A	Lmna	lamin A/C
IPI00231418.5	40	36	51	49	1_1_1_1_	4	10116 - Lmnb1 Lamin-B1	Lmnb1	lamin B1
IPI00366190.3	4	5	7	8	1_1_1_1_	4	10116 - Lmnb2 similar to Lamin-B2	Lmnb2	lamin B2
IPI00369351.3	4	2	1	1	1_1_1_1_	4	10116 - - 152 kDa protein	LOC100360342	rCG61559-like
IPI00475732.3	6	5	5	0	1_1_1_0_	3	10116 - - 14 kDa protein	LOC100360558; LOC100364858	ribosomal protein S12-like
IPI00400601.1	7	0	4	4	1_0_1_1_	3	10116 - - 19 kDa protein	LOC100360604	ribosomal protein L21-like
IPI00387709.1	4	5	4	0	1_1_1_0_	3	10116 - - 12 kDa protein	LOC100361060	ribosomal protein L36-like
IPI00192279.1	6	4	6	6	1_1_1_1_	4	10116 - SNRPA1	LOC100361269	U2 small nuclear ribonucleoprotein polypeptide A'
IPI00364420.2	9	0	5	4	1_0_1_1_	3	10116 - ELP3	LOC100362548	rCG52086-like
IPI00369383.4	9	4	9	7	1_1_1_1_	4	10116 - LOC300303 similar to Nucleophosmin	LOC300303	similar to Nucleophosmin (NPM) (Nucleolar phosphoprotein B23) (Numatrin) (Nucleolar protein NO38)
IPI00370776.2	0	8	9	5	0_1_1_1_	3	10116 - LOC303448 Similar to glyceraldehyde-3-phosphate dehydrogenase	LOC303448	similar to glyceraldehyde-3-phosphate dehydrogenase
IPI00763824.2	48	34	32	30	1_1_1_1_	4	10116 - LOC361100 DNA topoisomerase 2	LOC361100	similar to topoisomerase (DNA) II beta
IPI00209916.1	10	14	14	8	1_1_1_1_	4	10116 - LOC362855 UPF0027 protein C22orf28 homolog	LOC362855	P55
IPI00763753.1	0	12	6	6	0_1_1_1_	3	10116 - LOC500912 similar to Glyceraldehyde-3-phosphate dehydrogenase	LOC500912	similar to Glyceraldehyde-3-phosphate dehydrogenase (GAPDH)
IPI00764082.1	10	5	3	0	1_1_1_0_	3	10116 - LOC680063 similar to histone 2a	LOC680063	similar to histone 2a
IPI00558889.3	6	1	2	2	1_1_1_1_	4	10116 - LOC683179 similar to CG13745-PA	LOC683179	similar to CG13745-PA
IPI00768745.3	17	15	13	11	1_1_1_1_	4	10116 - LOC683324 similar to Nucleolar GTP-binding protein 1	LOC683324	similar to Nucleolar GTP-binding protein 1 (Chronic renal failure gene protein) (GTP-binding protein NGB)
IPI00766190.1	2	0	2	2	1_0_1_1_	3	10116 - LOC683646 similar to 60S ribosomal protein L7a	LOC683646	similar to 60S ribosomal protein L7a
IPI00393785.4	4	1	2	0	1_1_1_0_	3	10116 - LOC683674 similar to Protein C7orf26 homolog	LOC683674	similar to Protein C7orf26 homolog
IPI00765221.1	11	0	3	3	1_0_1_1_	3	10116 - LOC683961 similar to ribosomal protein S13	LOC683961	similar to ribosomal protein S13
IPI00763589.1	26	17	16	23	1_1_1_1_	4	10116 - LOC684681 similar to Histone H1.2	LOC684681	similar to Histone H1.2 (H1 VAR.1) (H1c)
IPI00392920.2	1	1	0	2	1_1_0_1_	3	10116 - LOC684976 hypothetical protein	LOC684976	hypothetical protein LOC684976
IPI00765755.1	1	2	3	2	1_1_1_1_	4	10116 - LOC687549 similar to CDK2 (cyclin-dependent kinase 2)-associated protein 1	LOC687549	similar to CDK2 (cyclin-dependent kinase 2)-associated protein 1
IPI00768953.1	2	1	1	0	1_1_1_0_	3	10116 - LOC687571 similar to cytochrome c oxidase, subunit VIb polypeptide 1	LOC687571	similar to cytochrome c oxidase, subunit VIb polypeptide 1
IPI00391486.4	3	0	4	1	1_0_1_1_	3	10116 - LOC687994 similar to 82-kD FMRP Interacting Protein	LOC687994	similar to 82-kD FMRP Interacting Protein
IPI00193564.1	5	5	0	1	1_1_0_1_	3	10116 - LOC690728 similar to Protein C12orf11 (Sarcoma antigen NY-SAR-95) isoform 1	LOC690728	similar to Protein C12orf11 (Sarcoma antigen NY-SAR-95)
IPI00766831.1	9	0	7	9	1_0_1_1_	3	10116 - LOC687039;LOC691496 hypothetical protein LOC691496	LOC691496	similar to histone 1, H2ai
IPI00364124.2	2	4	2	0	1_1_1_0_	3	10116 - Lrpap1 Alpha-2-macroglobulin receptor-associated protein	Lrpap1	low density lipoprotein receptor-related protein associated protein 1
IPI00206020.1	16	0	13	12	1_0_1_1_	3	10116 - Lrrc59 Leucine-rich repeat-containing protein 59	Lrrc59	leucine rich repeat containing 59
IPI00362626.1	2	1	0	3	1_1_0_1_	3	10116 - Lsm4 LSM4 homolog, U6 small nuclear RNA associated	Lsm4	LSM4 homolog, U6 small nuclear RNA associated (S. cerevisiae)
IPI00192696.1	1	0	2	1	1_0_1_1_	3	10116 - Mad1l1 MAD1 mitotic arrest deficient-like 1	Mad1l1	MAD1 mitotic arrest deficient-like 1 (yeast)
IPI00768919.1	6	5	4	6	1_1_1_1_	4	10116 - Magohb, LOC690303 similar to mago-nashi homolog	Magohb	mago-nashi homolog B (Drosophila)
IPI00372009.3	17	9	6	0	1_1_1_0_	3	10116 - Map1b microtubule-associated protein 1B	Map1b	microtubule-associated protein 1B
IPI00213299.5	8	4	7	5	1_1_1_1_	4	10116 - Mapre1 Microtubule-associated protein RP/EB family member 1	Mapre1	microtubule-associated protein, RP/EB family, member 1
IPI00201174.4	8	12	10	6	1_1_1_1_	4	10116 - Mcm4 minichromosome maintenance deficient 4	Mcm4	minichromosome maintenance complex component 4
IPI00358911.2	5	4	6	3	1_1_1_1_	4	10116 - Mcm6 DNA replication licensing factor MCM6	Mcm6	minichromosome maintenance complex component 6
IPI00371012.4	6	6	8	4	1_1_1_1_	4	10116 - Mcm7 Minichromosome maintenance protein 7	Mcm7	minichromosome maintenance complex component 7
IPI00206395.2	0	1	1	1	0_1_1_1_	3	10116 - Mcpt9 Granzyme J	Mcpt9	mast cell protease 9
IPI00358306.1	5	1	0	1	1_1_0_1_	3	10116 - Mcts1 Malignant T cell-amplified sequence 1	Mcts1	malignant T cell amplified sequence 1
IPI00207766.2	1	1	1	0	1_1_1_0_	3	10116 - Mgst3 similar to microsomal glutathione S-transferase 3	Mgst3	microsomal glutathione S-transferase 3
IPI00373523.2	2	3	0	3	1_1_0_1_	3	10116 - Morf4l1	Morf4l1	mortality factor 4 like 1
IPI00382238.1	2	2	0	1	1_1_0_1_	3	10116 - Mphosph8 Ab2-008	Mphosph8	M-phase phosphoprotein 8
IPI00203773.3	6	4	0	8	1_1_0_1_	3	10116 - Mrpl12 mitochondrial ribosomal protein L12	Mrpl12	mitochondrial ribosomal protein L12
IPI00206184.2	0	9	7	12	0_1_1_1_	3	10116 - Mta1 Isoform 1 of Metastasis-associated protein MTA1	Mta1	metastasis associated 1
IPI00382194.1	3	3	3	2	1_1_1_1_	4	10116 - Mtap Cc1-6	Mtap	methylthioadenosine phosphorylase
IPI00764690.3	9	0	4	2	1_0_1_1_	3	10116 - Mtch2 mitochondrial carrier homolog 2	Mtch2	mitochondrial carrier homolog 2 (C. elegans)
IPI00948259.1	6	0	7	3	1_0_1_1_	3	10116 - Mthfd1 Methylenetetrahydrofolate dehydrogenase (NADP+ dependent) 1, methenyltetrahydrofolate cyclohydrolase, formyltetrahydrofolate synthetase	Mthfd1	methylenetetrahydrofolate dehydrogenase (NADP+ dependent) 1, methenyltetrahydrofolate cyclohydrolase, formyltetrahydrofolate synthetase
IPI00365405.3	6	5	6	0	1_1_1_0_	3	10116 - Mthfd1l Mthfd1l protein	Mthfd1l	methylenetetrahydrofolate dehydrogenase (NADP+ dependent) 1-like
IPI00554213.1	6	4	4	2	1_1_1_1_	4	10116 - Mthfd2 methylenetetrahydrofolate dehydrogenase 2	Mthfd2	methylenetetrahydrofolate dehydrogenase (NADP+ dependent) 2, methenyltetrahydrofolate cyclohydrolase
IPI00205274.3	10	7	5	9	1_1_1_1_	4	10116 - Mybbp1a Myb-binding protein 1A	Mybbp1a	MYB binding protein (P160) 1a
IPI00209113.3	34	54	76	27	1_1_1_1_	4	10116 - Myh9 Myosin-9	Myh9	myosin, heavy chain 9, non-muscle
IPI00949378.1	6	6	6	0	1_1_1_0_	3	10116 - Myh9 26 kDa protein	Myh9	myosin, heavy chain 9, non-muscle
IPI00207988.1	17	14	0	7	1_1_0_1_	3	10116 - Myo1e Myosin-Ie	Myo1e	myosin IE
IPI00950630.1	9	3	3	2	1_1_1_1_	4	10116 - Myst2 71 kDa protein	Myst2	MYST histone acetyltransferase 2
IPI00327185.3	8	7	11	0	1_1_1_0_	3	10116 - Nap1l1 nucleosome assembly protein 1-like 1	Nap1l1	nucleosome assembly protein 1-like 1
IPI00231827.6	10	8	5	12	1_1_1_1_	4	10116 - Ncl Nucleolin	Ncl	nucleolin
IPI00373355.2	6	0	6	3	1_0_1_1_	3	10116 - Ncoa5 nuclear receptor coactivator 5	Ncoa5	nuclear receptor coactivator 5
IPI00421389.1	11	10	15	0	1_1_1_0_	3	10116 - Ndrg1 Protein NDRG1	Ndrg1	N-myc downstream regulated 1
IPI00213436.2	2	3	1	0	1_1_1_0_	3	10116 - Ndufa4 RCG28086, isoform CRA_a	Ndufa4	NADH dehydrogenase (ubiquinone) 1 alpha subcomplex, 4
IPI00202616.1	4	0	2	2	1_0_1_1_	3	10116 - Ndufs3 NADH dehydrogenase (ubiquinone) Fe-S protein 3	Ndufs3	NADH dehydrogenase (ubiquinone) Fe-S protein 3
IPI00363843.3	5	1	3	0	1_1_1_0_	3	10116 - Nek7 NIMA-related kinase 7	Nek7	NIMA (never in mitosis gene a)-related kinase 7
IPI00204994.1	3	2	2	2	1_1_1_1_	4	10116 - Nhp2 Nucleolar protein family A, member 2 (Predicted), isoform CRA_c	Nhp2	NHP2 ribonucleoprotein homolog (yeast)
IPI00204396.1	8	0	4	3	1_0_1_1_	3	10116 - Nip7 60S ribosome subunit biogenesis protein NIP7 homolog	Nip7	nuclear import 7 homolog (S. cerevisiae)
IPI00200409.4	0	11	4	3	0_1_1_1_	3	10116 - Nmt1 Glycylpeptide N-tetradecanoyltransferase 1	Nmt1	N-myristoyltransferase 1
IPI00949649.1	7	3	6	0	1_1_1_0_	3	10116 - Noc2l 86 kDa protein	Noc2l	nucleolar complex associated 2 homolog (S. cerevisiae)
IPI00363812.2	4	0	2	1	1_0_1_1_	3	10116 - Noc4l Nucleolar complex protein 4 homolog	Noc4l	nucleolar complex associated 4 homolog (S. cerevisiae)
IPI00870077.3	3	5	4	2	1_1_1_1_	4	10116 - Nol6 Neuroprotective protein 1	Nol6	nucleolar protein family 6 (RNA-associated)
IPI00763285.1	1	2	1	1	1_1_1_1_	4	10116 - Nol7 similar to Nucleolar protein 7	Nol7	nucleolar protein 7
IPI00195961.1	0	2	6	8	0_1_1_1_	3	10116 - Nolc1 Nucleolar and coiled-body phosphoprotein 1	Nolc1	nucleolar and coiled-body phosphoprotein 1
IPI00365744.1	6	2	2	1	1_1_1_1_	4	10116 - Nomo1 nodal modulator 1	Nomo1	nodal modulator 1
IPI00554155.4	16	14	16	15	1_1_1_1_	4	10116 - Nop2 similar to nucleolar protein 1	Nop2	NOP2 nucleolar protein homolog (yeast)
IPI00357923.3	39	23	27	34	1_1_1_1_	4	10116 - Nol5a Nucleolar protein 5A	Nop56	NOP56 ribonucleoprotein homolog (yeast)
IPI00197553.1	0	13	15	10	0_1_1_1_	3	10116 - Npm1 Isoform B23.1 of Nucleophosmin	Npm1	nucleophosmin (nucleolar phosphoprotein B23, numatrin)
IPI00210635.2	6	7	0	6	1_1_0_1_	3	10116 - Nsf Vesicle-fusing ATPase	Nsf	N-ethylmaleimide-sensitive factor
IPI00364693.3	7	9	11	9	1_1_1_1_	4	10116 - Nsun2 NOL1/NOP2/Sun domain family, member 2	Nsun2	NOL1/NOP2/Sun domain family, member 2
IPI00210009.1	1	1	2	0	1_1_1_0_	3	10116 - Nudc Nuclear migration protein nudC	Nudc	nuclear distribution gene C homolog (A. nidulans)
IPI00363489.1	6	2	5	8	1_1_1_1_	4	10116 - NUDT21, Cpsf5 Cleavage and polyadenylation specificity factor subunit 5	Nudt21	nudix (nucleoside diphosphate linked moiety X)-type motif 21
IPI00207272.4	11	8	8	7	1_1_1_1_	4	10116 - Nup107 Nuclear pore complex protein Nup107	Nup107	nucleoporin 107
IPI00188329.3	18	9	11	12	1_1_1_1_	4	10116 - Nup133 similar to Nuclear pore complex protein Nup133	Nup133	nucleoporin 133
IPI00203525.1	20	12	18	11	1_1_1_1_	4	10116 - Nup155 Nuclear pore complex protein Nup155	Nup155	nucleoporin 155
IPI00869782.2	26	0	17	22	1_0_1_1_	3	10116 - Nup160 nucleoporin 160	Nup160	nucleoporin 160
IPI00368544.3	22	5	7	10	1_1_1_1_	4	10116 - Nup188 similar to nucleoporin 188	Nup188	nucleoporin 188
IPI00870660.1	30	6	20	15	1_1_1_1_	4	10116 - Nup205 nucleoporin 205	Nup205	nucleoporin 205
IPI00372002.4	9	5	6	7	1_1_1_1_	4	10116 - Nup214 nucleoporin 214	Nup214	nucleoporin 214
IPI00211714.1	0	5	3	3	0_1_1_1_	3	10116 - Nup37 nucleoporin 37	Nup37	nucleoporin 37
IPI00370340.1	0	4	4	5	0_1_1_1_	3	10116 - Nup85 Nuclear pore complex protein Nup85	Nup85	nucleoporin 85
IPI00471848.1	21	20	18	8	1_1_1_1_	4	10116 - Nup93 Nuclear pore complex protein Nup93	Nup93	nucleoporin 93
IPI00389189.4	18	12	15	13	1_1_1_1_	4	10116 - Nup98 nuclear pore complex protein Nup98	Nup98	nucleoporin 98
IPI00189768.2	3	5	5	0	1_1_1_0_	3	10116 - Nupl1 Isoform p58 of Nucleoporin p58/p45	Nupl1	nucleoporin like 1
IPI00780433.1	6	10	0	6	1_1_0_1_	3	10116 - Pabpc4 Pabpc4 protein	Pabpc4	poly(A) binding protein, cytoplasmic 4
IPI00201279.2	4	1	2	1	1_1_1_1_	4	10116 - Paf1 RNA polymerase II-associated factor 1 homolog	Paf1	Paf1, RNA polymerase II associated factor, homolog (S. cerevisiae)
IPI00951385.1	9	17	15	10	1_1_1_1_	4	10116 - Paics 47 kDa protein	Paics	phosphoribosylaminoimidazole carboxylase, phosphoribosylaminoimidazole succinocarboxamide synthetase
IPI00231678.5	23	17	23	26	1_1_1_1_	4	10116 - Parp1 Poly [ADP-ribose] polymerase 1	Parp1	poly (ADP-ribose) polymerase 1
IPI00391244.4	1	1	0	1	1_1_0_1_	3	10116 - Parvb parvin, beta	Parvb	parvin, beta
IPI00870468.2	15	5	12	0	1_1_1_0_	3	10116 - Pdcd11 programmed cell death protein 11	Pdcd11	programmed cell death 11
IPI00203255.1	5	4	0	3	1_1_0_1_	3	10116 - Pdcd6 programmed cell death 6	Pdcd6	programmed cell death 6
IPI00767837.1	5	5	0	3	1_1_0_1_	3	10116 - Pdcd6ip Programmed cell death 6-interacting protein	Pdcd6ip	programmed cell death 6 interacting protein
IPI00194324.2	3	3	4	0	1_1_1_0_	3	10116 - Pdhb Pyruvate dehydrogenase E1 component subunit beta, mitochondrial	Pdhb	pyruvate dehydrogenase (lipoamide) beta
IPI00210187.1	1	1	2	0	1_1_1_0_	3	10116 - Pdlim5 PDZ and LIM domain protein 5	Pdlim5	PDZ and LIM domain 5
IPI00364488.5	27	15	18	0	1_1_1_0_	3	10116 - Pds5a Sister chromatid cohesion protein PDS5 homolog A	Pds5a	PDS5, regulator of cohesion maintenance, homolog A (S. cerevisiae)
IPI00231358.6	2	2	8	0	1_1_1_0_	3	10116 - Pfn1 Profilin-1	Pfn1	profilin 1
IPI00382191.1	5	0	10	4	1_0_1_1_	3	10116 - Pgd 6-phosphogluconate dehydrogenase, decarboxylating	Pgd	phosphogluconate dehydrogenase
IPI00190557.2	8	8	10	5	1_1_1_1_	4	10116 - Phb2 Prohibitin-2	Phb2	prohibitin 2
IPI00475835.3	3	0	14	4	1_0_1_1_	3	10116 - Phgdh D-3-phosphoglycerate dehydrogenase	Phgdh	phosphoglycerate dehydrogenase
IPI00193080.3	1	1	1	1	1_1_1_1_	4	10116 - PIGU, Cdc91l1 Isoform 1 of Phosphatidylinositol glycan anchor biosynthesis class U protein	Pigu	phosphatidylinositol glycan anchor biosynthesis, class U
IPI00366752.4	1	3	3	3	1_1_1_1_	4	10116 - Pitrm1 118 kDa protein	Pitrm1	pitrilysin metallopeptidase 1
IPI00339197.4	20	0	23	12	1_0_1_1_	3	10116 - Pkm2 Isoform M2 of Pyruvate kinase isozymes M1/M2	Pkm2	pyruvate kinase, muscle
IPI00421410.1	2	3	0	2	1_1_0_1_	3	10116 - Pkn3 protein kinase N3	Pkn3	protein kinase N3
IPI00567739.3	149	132	129	0	1_1_1_0_	3	10116 - Plec Plectin 11	Plec	plectin
IPI00206780.1	2	2	5	1	1_1_1_1_	4	10116 - Plg Plasminogen	Plg	plasminogen
IPI00364151.3	3	0	1	1	1_0_1_1_	3	10116 - Pnpt1 polyribonucleotide nucleotidyltransferase 1	Pnpt1	polyribonucleotide nucleotidyltransferase 1
IPI00199160.1	16	9	8	4	1_1_1_1_	4	10116 - Polr1a DNA-directed RNA polymerase I subunit RPA1	Polr1a	polymerase (RNA) I polypeptide A
IPI00765968.2	4	0	5	5	1_0_1_1_	3	10116 - Polr2e;LOC687055 DNA-directed RNA polymerases I, II, and III subunit RPABC1	Polr2e	polymerase (RNA) II (DNA directed) polypeptide E
IPI00778269.1	3	0	2	4	1_0_1_1_	3	10116 - Ppan Protein	Ppan	peter pan homolog (Drosophila)
IPI00213644.3	13	12	10	10	1_1_1_1_	4	10116 - Ppib Peptidyl-prolyl cis-trans isomerase B	Ppib	peptidylprolyl isomerase B
IPI00231715.1	21	11	0	11	1_1_0_1_	3	10116 - Ppp1cc Isoform Gamma-2 of Serine/threonine-protein phosphatase PP1-gamma catalytic subunit	Ppp1cc	protein phosphatase 1, catalytic subunit, gamma isoform
IPI00365423.1	10	0	12	8	1_0_1_1_	3	10116 - Ppp2r1a Protein phosphatase 2 (Formerly 2A), regulatory subunit A (PR 65), alpha isoform, isoform CRA_a	Ppp2r1a	protein phosphatase 2 (formerly 2A), regulatory subunit A, alpha isoform
IPI00389636.3	6	6	8	4	1_1_1_1_	4	10116 - Ppp2r1b 76 kDa protein	Ppp2r1b	protein phosphatase 2 (formerly 2A), regulatory subunit A, beta isoform
IPI00366908.3	5	1	1	1	1_1_1_1_	4	10116 - Ppp2r5d similar to delta isoform of regulatory subunit B56, protein phosphatase 2A isoform 1	Ppp2r5d	protein phosphatase 2, regulatory subunit B', delta isoform
IPI00421692.1	2	0	1	1	1_0_1_1_	3	10116 - Pqbp1 Polyglutamine-binding protein 1	Pqbp1	polyglutamine binding protein 1
IPI00193027.5	4	3	2	3	1_1_1_1_	4	10116 - Prc1 71 kDa protein	Prc1	protein regulator of cytokinesis 1
IPI00208215.2	2	0	2	1	1_0_1_1_	3	10116 - Prdx3 Thioredoxin-dependent peroxide reductase, mitochondrial	Prdx3	peroxiredoxin 3
IPI00204724.2	5	0	3	4	1_0_1_1_	3	10116 - Prpf38a PRP38 pre-mRNA processing factor 38 (yeast) domain containing A	Prpf38a	PRP38 pre-mRNA processing factor 38 (yeast) domain containing A
IPI00212767.1	2	4	3	2	1_1_1_1_	4	10116 - Prss1 Anionic trypsin-1	Prss1	protease, serine, 1 (trypsin 1)
IPI00210158.1	0	5	5	2	0_1_1_1_	3	10116 - Psmc4 26S protease regulatory subunit 6B	Psmc4	proteasome (prosome, macropain) 26S subunit, ATPase, 4
IPI00765842.4	3	5	5	1	1_1_1_1_	4	10116 - Psmd11 Putative uncharacterized protein	Psmd11	proteasome (prosome, macropain) 26S subunit, non-ATPase, 11
IPI00763874.1	1	2	5	0	1_1_1_0_	3	10116 - Psmd14 similar to 26S proteasome non-ATPase regulatory subunit 14	Psmd14	proteasome (prosome, macropain) 26S subunit, non-ATPase, 14
IPI00382214.1	2	0	3	1	1_0_1_1_	3	10116 - Psme3 Ab2-371	Psme3	proteasome (prosome, macropain) activator subunit 3
IPI00390239.1	0	9	23	17	0_1_1_1_	3	10116 - Ptbp1 Ptbp1 protein	Ptbp1	polypyrimidine tract binding protein 1
IPI00764922.1	9	0	7	6	1_0_1_1_	3	10116 - PUF60, Siahbp1 similar to fuse-binding protein-interacting repressor isoform b	Puf60	poly-U binding splicing factor 60
IPI00372838.3	5	2	5	4	1_1_1_1_	4	10116 - Pwp2 PWP2 periodic tryptophan protein homolog	Pwp2	PWP2 periodic tryptophan protein homolog (yeast)
IPI00382300.3	1	1	1	0	1_1_1_0_	3	10116 - Rab1 Ac2-048	Rab1	RAB1A, member RAS oncogene family
IPI00196794.3	4	3	7	1	1_1_1_1_	4	10116 - Rab14 Ras-related protein Rab-14	Rab14	RAB14, member RAS oncogene family
IPI00215564.1	3	9	5	2	1_1_1_1_	4	10116 - Rab7a Ras-related protein Rab-7a	Rab7a	RAB7A, member RAS oncogene family
IPI00779108.1	1	1	3	0	1_1_1_0_	3	10116 - Rab8a 24 kDa protein	Rab8a	RAB8A, member RAS oncogene family
IPI00361725.2	7	5	2	3	1_1_1_1_	4	10116 - Racgap1 Racgap1 protein	Racgap1	Rac GTPase activating protein 1
IPI00565749.1	2	4	1	1	1_1_1_1_	4	10116 - Rai14 Isoform 1 of Ankycorbin	Rai14	retinoic acid induced 14
IPI00371944.3	21	19	16	10	1_1_1_1_	4	10116 - Ranbp2 similar to RAN binding protein 2	Ranbp2	RAN binding protein 2
IPI00471774.3	5	8	8	5	1_1_1_1_	4	10116 - Rangap1 RAN GTPase activating protein 1	Rangap1	Ran GTPase activating protein 1
IPI00200047.4	15	23	16	21	1_1_1_1_	4	10116 - Rbm14 similar to RNA-binding protein 14	Rbm14	RNA binding motif protein 14
IPI00194439.1	2	2	3	3	1_1_1_1_	4	10116 - Rbm22 Pre-mRNA-splicing factor RBM22	Rbm22	RNA binding motif protein 22
IPI00396903.1	1	0	1	1	1_0_1_1_	3	10116 - Rela V-rel reticuloendotheliosis viral oncogene homolog A	Rela	v-rel reticuloendotheliosis viral oncogene homolog A (avian)
IPI00209665.3	2	0	2	1	1_0_1_1_	3	10116 - Rfc1 replication factor C (activator 1) 1	Rfc1	replication factor C (activator 1) 1
IPI00367982.3	1	1	1	2	1_1_1_1_	4	10116 - RGD1306119 hypothetical protein LOC314306	RGD1306119	similar to transcriptional regulating protein 132
IPI00368742.3	1	2	3	0	1_1_1_0_	3	10116 - RGD1309926 similar to neutrophil cytosolic factor 1	RGD1309926	similar to RIKEN cDNA G431001E03 gene
IPI00362656.4	7	1	1	3	1_1_1_1_	4	10116 - RGD1311747 hypothetical protein LOC290706	RGD1311747	similar to 2700029M09Rik protein
IPI00373541.2	2	0	6	3	1_0_1_1_	3	10116 - RGD1560797 similar to glyceraldehyde-3-phosphate dehydrogenase	RGD1560797	similar to glyceraldehyde-3-phosphate dehydrogenase
IPI00369166.3	8	9	10	5	1_1_1_1_	4	10116 - RGD1561178 similar to glyceraldehyde-3-phosphate dehydrogenase	RGD1561178	similar to glyceraldehyde-3-phosphate dehydrogenase	*
IPI00392955.3	0	5	5	5	0_1_1_1_	3	10116 - - 123 kDa protein	RGD1561367	similar to Anillin
IPI00764275.1	7	5	4	3	1_1_1_1_	4	10116 - RGD1561367 similar to anillin	RGD1561367	similar to Anillin
IPI00364559.3	8	3	2	3	1_1_1_1_	4	10116 - RGD1562646 similar to chromosome condensation protein G	RGD1562646	similar to chromosome condensation protein G
IPI00764636.1	20	13	13	14	1_1_1_1_	4	10116 - RGD1564519 similar to High mobility group protein 2	RGD1564519	similar to High mobility group protein 2 (HMG-2)
IPI00559898.2	18	29	20	20	1_1_1_1_	4	10116 - RGD1564688 similar to glyceraldehyde-3-phosphate dehydrogenase	RGD1564688	similar to glyceraldehyde-3-phosphate dehydrogenase
IPI00188688.1	33	10	0	23	1_1_0_1_	3	10116 - RGD1564767 Histone H2A	RGD1564767	Histone H2a
IPI00373755.2	4	3	0	6	1_1_0_1_	3	10116 - RGD1564883 similar to 60S ribosomal protein L12	RGD1564883	similar to 60S ribosomal protein L12
IPI00568707.2	7	11	10	8	1_1_1_1_	4	10116 - RGD1565928 similar to Glyceraldehyde-3-phosphate dehydrogenase	RGD1565928	similar to glyceraldehyde-3-phosphate dehydrogenase
IPI00948969.1	8	12	8	4	1_1_1_1_	4	10116 - Rpa1 63 kDa protein	Rpa1	replication protein A1, 70kDa
IPI00395285.3	12	9	20	6	1_1_1_1_	4	10116 - Rpl3 60S ribosomal protein L3	Rpl3	ribosomal protein L3
IPI00202512.7	20	17	19	0	1_1_1_0_	3	10116 - Rpl4 60S ribosomal protein L4	Rpl4	ribosomal protein L4
IPI00390343.6	9	0	15	6	1_0_1_1_	3	10116 - Rpl6 60S ribosomal protein L6	Rpl6	ribosomal protein L6
IPI00515778.4	6	7	9	0	1_1_1_0_	3	10116 - Rpl9 60S ribosomal protein L9	Rpl9	ribosomal protein L9
IPI00200147.1	15	13	17	12	1_1_1_1_	4	10116 - Arbp 60S acidic ribosomal protein P0	Rplp0	ribosomal protein, large, P0
IPI00951057.1	5	0	6	5	1_0_1_1_	3	10116 - Rpn2 72 kDa protein	Rpn2	ribophorin II
IPI00368202.4	2	0	2	2	1_0_1_1_	3	10116 - Rpp30 similar to Ribonuclease P protein subunit p30	Rpp30	ribonuclease P/MRP 30 subunit (human)
IPI00201500.8	9	4	8	3	1_1_1_1_	4	10116 - Rps14 40S ribosomal protein S14	Rps14	ribosomal protein S14
IPI00392390.2	14	0	12	11	1_0_1_1_	3	10116 - Rps2 40S ribosomal protein S2	Rps2	ribosomal protein S2
IPI00360547.4	4	0	3	3	1_0_1_1_	3	10116 - Rrp1 Ribosomal RNA processing 1 homolog	Rrp1	ribosomal RNA processing 1 homolog (S. cerevisiae)
IPI00869600.1	5	3	3	2	1_1_1_1_	4	10116 - Rrp9 RNA, U3 small nucleolar interacting protein 2 (Predicted), isoform CRA_a	Rrp9	ribosomal RNA processing 9, small subunit (SSU) processome component, homolog (yeast)
IPI00368458.1	4	3	3	0	1_1_1_0_	3	10116 - Rsl1d1 Ac1158	Rsl1d1	ribosomal L1 domain containing 1
IPI00554148.1	3	0	3	3	1_0_1_1_	3	10116 - S100a11 Protein S100-A11	S100a11	S100 calcium binding protein A11 (calizzarin)
IPI00209618.2	6	5	5	3	1_1_1_1_	4	10116 - Safb Scaffold attachment factor B1	Safb	scaffold attachment factor B
IPI00365447.3	1	0	2	1	1_0_1_1_	3	10116 - Saps1 SAPS domain family, member 1	Saps1	SAPS domain family, member 1
IPI00365946.3	3	5	5	1	1_1_1_1_	4	10116 - Sarnp SAP domain-containing ribonucleoprotein	Sarnp	SAP domain containing ribonucleoprotein
IPI00373410.4	3	2	7	2	1_1_1_1_	4	10116 - Sars 61 kDa protein	Sars	seryl-tRNA synthetase
IPI00359967.4	0	2	3	2	0_1_1_1_	3	10116 - Scyl2 similar to D10Ertd802e protein	Scyl2	SCY1-like 2 (S. cerevisiae)
IPI00364566.1	2	2	0	1	1_1_0_1_	3	10116 - Sec13 Protein SEC13 homolog	Sec13	SEC13 homolog (S. cerevisiae)
IPI00869818.1	0	3	4	4	0_1_1_1_	3	10116 - Sec23a SEC23A	Sec23a	Sec23 homolog A (S. cerevisiae)
IPI00210147.2	2	1	2	2	1_1_1_1_	4	10116 - Sec31a Isoform 1 of Protein transport protein Sec31A	Sec31a	SEC31 homolog A (S. cerevisiae)
IPI00215235.6	18	12	12	10	1_1_1_1_	4	10116 - Sept9 septin-9 isoform 1	SEPT9	septin 9
IPI00948049.1	0	11	10	11	0_1_1_1_	3	10116 - Sf3b2 Protein	Sf3b2	splicing factor 3b, subunit 2
IPI00627068.1	28	26	33	31	1_1_1_1_	4	10116 - Sfpq Splicing factor proline/glutamine rich	Sfpq	splicing factor proline/glutamine rich (polypyrimidine tract binding protein associated)
IPI00421364.1	5	5	3	4	1_1_1_1_	4	10116 - Shmt1 Serine hydroxymethyltransferase	Shmt1	serine hydroxymethyltransferase 1 (soluble)
IPI00195109.3	17	12	11	9	1_1_1_1_	4	10116 - Shmt2 Serine hydroxymethyltransferase	Shmt2	serine hydroxymethyltransferase 2 (mitochondrial)
IPI00372914.5	6	6	0	4	1_1_0_1_	3	10116 - Skiv2l2 superkiller viralicidic activity 2-like 2	Skiv2l2	superkiller viralicidic activity 2-like 2 (S. cerevisiae)
IPI00358163.3	3	0	2	1	1_0_1_1_	3	10116 - Slc25a13 similar to Calcium-binding mitochondrial carrier protein Aralar2	Slc25a13	solute carrier family 25, member 13 (citrin)
IPI00734667.1	4	0	4	3	1_0_1_1_	3	10116 - Slc25a22 35 kDa protein	Slc25a22	solute carrier family 25 (mitochondrial carrier, glutamate), member 22
IPI00200466.3	29	0	21	19	1_0_1_1_	3	10116 - Slc25a5 ADP/ATP translocase 2	Slc25a5	solute carrier family 25 (mitochondrial carrier; adenine nucleotide translocator), member 5
IPI00948865.1	3	2	3	2	1_1_1_1_	4	10116 - Smad4 61 kDa protein	Smad4	SMAD family member 4
IPI00765123.1	10	6	5	5	1_1_1_1_	4	10116 - Smc4 similar to SMC4 structural maintenance of chromosomes 4-like 1	Smc4	structural maintenance of chromosomes 4
IPI00766893.1	20	11	12	12	1_1_1_1_	4	10116 - Smchd1, RGD1307234 similar to SMC hinge domain containing 1	Smchd1	structural maintenance of chromosomes flexible hinge domain containing 1
IPI00954683.1	4	8	4	1	1_1_1_1_	4	10116 - Smpd4 sphingomyelin phosphodiesterase 4	Smpd4	sphingomyelin phosphodiesterase 4
IPI00365737.3	6	3	0	3	1_1_0_1_	3	10116 - Snrnp70 U1 small nuclear ribonucleoprotein polypeptide A (Predicted), isoform CRA_c	Snrnp70	small nuclear ribonucleoprotein 70 (U1)
IPI00357915.3	1	0	1	1	1_0_1_1_	3	10116 - Spata5l1	Spata5l1	spermatogenesis associated 5-like 1
IPI00364385.3	1	2	1	0	1_1_1_0_	3	10116 - Spcs2 similar to signal peptidase complex subunit 2 homolog	Spcs2	signal peptidase complex subunit 2 homolog (S. cerevisiae)
IPI00766280.2	1	1	2	0	1_1_1_0_	3	10116 - Spcs3	Spcs3	signal peptidase complex subunit 3 homolog (S. cerevisiae)
IPI00475874.5	3	8	3	5	1_1_1_1_	4	10116 - Spna2 Alpha II spectrin	Spna2	alpha-spectrin 2
IPI00200886.1	2	0	4	1	1_0_1_1_	3	10116 - Src Rous sarcoma oncogene, isoform CRA_a	Src	v-src sarcoma (Schmidt-Ruppin A-2) viral oncogene homolog (avian)
IPI00197952.1	1	4	2	0	1_1_1_0_	3	10116 - Srm Spermidine synthase	Srm	spermidine synthase
IPI00372823.3	4	0	3	1	1_0_1_1_	3	10116 - Srpk1 Serine/arginine-rich protein specific kinase 1	Srpk1	SFRS protein kinase 1
IPI00196656.2	4	2	0	2	1_1_0_1_	3	10116 - Srprb Ba1-667	Srprb	signal recognition particle receptor, B subunit
IPI00779470.2	7	1	5	8	1_1_1_1_	4	10116 - Srrm1 107 kDa protein	Srrm1	serine/arginine repetitive matrix 1
IPI00368692.5	17	18	13	7	1_1_1_1_	4	10116 - Srrm2 similar to serine/arginine repetitive matrix 2	Srrm2	serine/arginine repetitive matrix 2
IPI00212219.1	7	6	6	5	1_1_1_1_	4	10116 - Ssb Lupus La protein homolog	Ssb	Sjogren syndrome antigen B
IPI00562672.2	9	9	4	6	1_1_1_1_	4	10116 - Ssrp1 82 kDa protein	Ssrp1	structure specific recognition protein 1
IPI00371034.3	0	8	6	7	0_1_1_1_	3	10116 - Stag1 144 kDa protein	Stag1	stromal antigen 1
IPI00208224.3	1	0	2	3	1_0_1_1_	3	10116 - Stat3 Signal transducer and activator of transcription 3	Stat3	signal transducer and activator of transcription 3
IPI00324442.3	4	1	3	1	1_1_1_1_	4	10116 - Stau1 staufen RNA binding protein homolog 1 isoform 1	Stau1	staufen RNA binding protein homolog 1 (Drosophila)
IPI00213013.1	5	3	6	3	1_1_1_1_	4	10116 - Stip1 Stress-induced-phosphoprotein 1	Stip1	stress-induced phosphoprotein 1
IPI00197555.6	0	2	3	3	0_1_1_1_	3	10116 - Suclg1 Succinyl-CoA ligase [GDP-forming] subunit alpha, mitochondrial	Suclg1	succinate-CoA ligase, alpha subunit
IPI00869870.1	17	14	13	6	1_1_1_1_	4	10116 - Supt16h suppressor of Ty 16 homolog	Supt16h	suppressor of Ty 16 homolog (S. cerevisiae)
IPI00198210.7	7	8	7	0	1_1_1_0_	3	10116 - Supt5h 121 kDa protein	Supt5h	suppressor of Ty 5 homolog (S. cerevisiae)
IPI00199386.1	1	1	0	1	1_1_0_1_	3	10116 - Taf10 TAF10 RNA polymerase II, TATA box binding protein (TBP)-associated factor	Taf10	TAF10 RNA polymerase II, TATA box binding protein (TBP)-associated factor
IPI00360382.2	2	0	1	1	1_0_1_1_	3	10116 - Taf6l Taf6l protein	Taf6l	TAF6-like RNA polymerase II, p300/CBP-associated factor (PCAF)-associated factor
IPI00555171.3	3	10	13	3	1_1_1_1_	4	10116 - Tagln2 Transgelin-2	Tagln2	transgelin 2
IPI00369236.3	6	0	3	10	1_0_1_1_	3	10116 - Tbl3 Transducin beta-like protein 3	Tbl3	transducin (beta)-like 3
IPI00367735.3	2	0	1	2	1_0_1_1_	3	10116 - Tdp1 Tyrosyl-DNA phosphodiesterase 1	Tdp1	tyrosyl-DNA phosphodiesterase 1
IPI00364865.2	7	0	2	4	1_0_1_1_	3	10116 - Tex10 testis expressed gene 10	Tex10	testis expressed 10
IPI00190035.1	6	0	6	2	1_0_1_1_	3	10116 - Tfip11 Tuftelin-interacting protein 11	Tfip11	tuftelin interacting protein 11
IPI00560890.2	7	6	5	6	1_1_1_1_	4	10116 - Thoc1 75 kDa protein	Thoc1	THO complex 1
IPI00357963.3	18	17	6	0	1_1_1_0_	3	10116 - Thoc2 similar to THO complex subunit 2	Thoc2	THO complex 2
IPI00763263.2	12	10	10	9	1_1_1_1_	4	10116 - Thoc4 similar to THO complex subunit 4 (Tho4) (RNA and export factor binding protein 1) (REF1-I) (Ally of AML-1 and LEF-1) (Aly/REF) isoform 2	Thoc4	THO complex 4
IPI00201096.2	6	2	1	0	1_1_1_0_	3	10116 - Thoc6 THO complex subunit 6 homolog	Thoc6	THO complex 6 homolog (Drosophila)
IPI00766466.1	2	2	0	2	1_1_0_1_	3	10116 - Thoc7 similar to Ngg1 interacting factor 3 like 1 binding protein 1 isoform 1	Thoc7	THO complex 7 homolog (Drosophila)
IPI00776900.1	1	1	1	1	1_1_1_1_	4	10116 - Tm9sf2 76 kDa protein	Tm9sf2	transmembrane 9 superfamily member 2
IPI00764744.1	5	0	3	1	1_0_1_1_	3	10116 - Tnpo1 similar to transportin 1	Tnpo1	transportin 1
IPI00565421.1	6	0	7	5	1_0_1_1_	3	10116 - Tomm34 Mitochondrial import receptor subunit TOM34	Tomm34	translocase of outer mitochondrial membrane 34
IPI00204133.1	30	32	22	18	1_1_1_1_	4	10116 - Top1 DNA topoisomerase 1	Top1	topoisomerase (DNA) I
IPI00193944.1	71	57	59	49	1_1_1_1_	4	10116 - Top2a DNA topoisomerase 2-alpha	Top2a	topoisomerase (DNA) II alpha
IPI00562522.2	68	56	57	0	1_1_1_0_	3	10116 - Top2a 173 kDa protein	Top2a	topoisomerase (DNA) II alpha
IPI00949281.1	2	1	0	1	1_1_0_1_	3	10116 - Tor1b 38 kDa protein	Tor1b	torsin family 1, member B
IPI00876608.1	45	41	23	42	1_1_1_1_	4	10116 - Tpr 267 kDa protein	Tpr	translocated promoter region
IPI00364740.1	7	6	0	3	1_1_0_1_	3	10116 - Tpx2 TPX2, microtubule-associated, homolog	Tpx2	TPX2, microtubule-associated, homolog (Xenopus laevis)
IPI00201580.5	1	1	0	1	1_1_0_1_	3	10116 - Tra2a Tra2a protein	Tra2a	transformer 2 alpha homolog (Drosophila)
IPI00361443.3	0	6	8	4	0_1_1_1_	3	10116 - Ttll12 tubulin tyrosine ligase-like family, member 12	Ttll12	tubulin tyrosine ligase-like family, member 12
IPI00210181.1	13	6	5	1	1_1_1_1_	4	10116 - Tubg1 Tubulin gamma-1 chain	Tubg1	tubulin, gamma 1
IPI00371236.3	7	0	5	1	1_0_1_1_	3	10116 - Tufm Elongation factor Tu, mitochondrial	Tufm	Tu translation elongation factor, mitochondrial
IPI00949906.1	6	0	4	3	1_0_1_1_	3	10116 - Txnrd1 67 kDa protein	Txnrd1	thioredoxin reductase 1
IPI00765565.1	11	6	8	8	1_1_1_1_	4	10116 - U2af2 similar to U2 (RNU2) small nuclear RNA auxiliary factor 2 isoform b isoform 1	U2af2	U2 small nuclear ribonucleoprotein auxiliary factor (U2AF) 2
IPI00368347.2	10	9	19	0	1_1_1_0_	3	10116 - Uba1 Ubiquitin-like modifier-activating enzyme 1	Uba1	ubiquitin-like modifier activating enzyme 1
IPI00947691.1	2	1	2	0	1_1_1_0_	3	10116 - Ubr4, Rbaf600 576 kDa protein	Ubr4	ubiquitin protein ligase E3 component n-recognin 4
IPI00371952.2	1	0	2	2	1_0_1_1_	3	10116 - Ubxn4 UBX domain-containing protein 4	Ubxn4	UBX domain protein 4
IPI00195803.1	5	0	9	7	1_0_1_1_	3	10116 - Ugdh UDP-glucose 6-dehydrogenase	Ugdh	UDP-glucose dehydrogenase
IPI00371346.1	4	0	3	2	1_0_1_1_	3	10116 - Uhrf1 E3 ubiquitin-protein ligase UHRF1	Uhrf1	ubiquitin-like with PHD and ring finger domains 1
IPI00361196.3	3	0	2	2	1_0_1_1_	3	10116 - Unc84b similar to unc-84 homolog B	Unc84b	unc-84 homolog B (C. elegans)
IPI00362936.3	4	0	1	1	1_0_1_1_	3	10116 - Urb1 similar to Nucleolar preribosomal-associated protein 1	Urb1	URB1 ribosome biogenesis 1 homolog (S. cerevisiae)
IPI00359893.3	3	0	4	2	1_0_1_1_	3	10116 - Urb2 URB2 ribosome biogenesis 2	Urb2	URB2 ribosome biogenesis 2 homolog (S. cerevisiae)
IPI00869569.1	12	5	6	4	1_1_1_1_	4	10116 - Usp39 ubiquitin specific peptidase 39	Usp39	ubiquitin specific peptidase 39
IPI00360292.4	5	7	3	0	1_1_1_0_	3	10116 - Utp15 U3 small nucleolar RNA-associated protein 15 homolog	Utp15	UTP15, U3 small nucleolar ribonucleoprotein, homolog (S. cerevisiae)
IPI00914191.1	6	2	3	8	1_1_1_1_	4	10116 - Utp18 UTP18, small subunit processome component	Utp18	UTP18, small subunit (SSU) processome component, homolog (yeast)
IPI00359930.3	28	4	15	9	1_1_1_1_	4	10116 - Utp20 similar to Small subunit processome component 20 homolog	Utp20	UTP20, small subunit (SSU) processome component, homolog (yeast)
IPI00209290.3	6	3	4	3	1_1_1_1_	4	10116 - Vapa Vesicle-associated membrane protein-associated protein A	Vapa	VAMP (vesicle-associated membrane protein)-associated protein A
IPI00372557.3	3	5	5	0	1_1_1_0_	3	10116 - Vars Valyl-tRNA synthetase	Vars	valyl-tRNA synthetase
IPI00212014.3	11	10	16	8	1_1_1_1_	4	10116 - Vcp Transitional endoplasmic reticulum ATPase	Vcp	valosin-containing protein
IPI00198327.2	14	8	10	0	1_1_1_0_	3	10116 - Vdac2 Voltage-dependent anion-selective channel protein 2	Vdac2	voltage-dependent anion channel 2
IPI00230941.5	69	46	52	71	1_1_1_1_	4	10116 - Vim Vimentin	Vim	vimentin
IPI00209483.3	4	0	3	2	1_0_1_1_	3	10116 - Vps11 109 kDa protein	Vps11	vacuolar protein sorting 11 homolog (S. cerevisiae)
IPI00471668.3	3	1	2	0	1_1_1_0_	3	10116 - Vps16 Vacuolar protein sorting 16 (Yeast), isoform CRA_a	Vps16	vacuolar protein sorting 16 homolog (S. cerevisiae)
IPI00209526.3	7	5	0	4	1_1_0_1_	3	10116 - Vrk1 50 kDa protein	Vrk1	vaccinia related kinase 1
IPI00364958.5	15	5	5	5	1_1_1_1_	4	10116 - Wdr36 similar to WD repeat domain 36	Wdr36	WD repeat domain 36
IPI00421416.1	4	0	2	7	1_0_1_1_	3	10116 - Wdr55 LRRG00133	Wdr55	WD repeat domain 55
IPI00870393.2	0	1	1	1	0_1_1_1_	3	10116 - Xpo5 exportin 5	Xpo5	exportin 5
IPI00767715.1	2	0	1	1	1_0_1_1_	3	10116 - Zfp187 similar to zinc finger protein 187	Zfp187	zinc finger protein 187
IPI00363446.2	1	3	2	2	1_1_1_1_	4	10116 - Zfp281 Zinc finger protein 281	Zfp281	zinc finger protein 281
IPI00193280.4	2	1	0	2	1_1_0_1_	3	10116 - Zfp800, RGD1560157 hypothetical protein LOC500057	Zfp800	zinc finger protein 800
IPI00765951.1	2	5	0	3	1_1_0_1_	3	10116 - Zmym4 similar to zinc finger protein 262 isoform 2	Zmym4	zinc finger, MYM-type 4
IPI00910701.1	3	0	7	4	1_0_1_1_	3	9606 - AARS cDNA FLJ61339, highly similar to Alanyl-tRNA synthetase	AARS	alanyl-tRNA synthetase
IPI00302238.3	6	3	0	4	1_1_0_1_	3	9606 - AATF Protein AATF	AATF	apoptosis antagonizing transcription factor
IPI00908804.1	0	3	1	1	0_1_1_1_	3	9606 - ABCD3 cDNA FLJ53353, highly similar to ATP-binding cassette sub-family D member 3	ABCD3	ATP-binding cassette, sub-family D (ALD), member 3
IPI00303207.3	8	0	11	6	1_0_1_1_	3	9606 - ABCE1 ATP-binding cassette sub-family E member 1	ABCE1	ATP-binding cassette, sub-family E (OABP), member 1
IPI00068506.1	8	6	8	0	1_1_1_0_	3	9606 - ABCF2 ATP-binding cassette, sub-family F, member 2 isoform b	ABCF2	ATP-binding cassette, sub-family F (GCN20), member 2
IPI00060569.1	2	0	2	1	1_0_1_1_	3	9606 - ABHD12 Isoform 2 of Monoacylglycerol lipase ABHD12	ABHD12	abhydrolase domain containing 12
IPI00029737.1	5	5	3	4	1_1_1_1_	4	9606 - ACSL4 Isoform Long of Long-chain-fatty-acid--CoA ligase 4	ACSL4	acyl-CoA synthetase long-chain family member 4
IPI00003269.1	12	11	9	8	1_1_1_1_	4	9606 - ACTBL2 Beta-actin-like protein 2	ACTBL2	actin, beta-like 2
IPI00921118.1	7	7	0	1	1_1_0_1_	3	9606 - ACTN1 Actinin alpha 1 isoform 3	ACTN1	actinin, alpha 1
IPI00470573.1	7	5	0	1	1_1_0_1_	3	9606 - ACTR2 actin-related protein 2 isoform a	ACTR2	ARP2 actin-related protein 2 homolog (yeast)
IPI00217957.5	0	2	2	2	0_1_1_1_	3	9606 - AHCTF1;AHCTF1P1 256 kDa protein	AHCTF1	AT hook containing transcription factor 1
IPI00021812.2	31	20	21	7	1_1_1_1_	4	9606 - AHNAK Neuroblast differentiation-associated protein AHNAK	AHNAK	AHNAK nucleoprotein
IPI00022431.2	2	0	3	1	1_0_1_1_	3	9606 - AHSG cDNA FLJ55606, highly similar to Alpha-2-HS-glycoprotein	AHSG	alpha-2-HS-glycoprotein
IPI00418262.5	9	7	6	0	1_1_1_0_	3	9606 - ALDOC Fructose-bisphosphate aldolase	ALDOC	aldolase C, fructose-bisphosphate
IPI00743594.1	3	2	3	3	1_1_1_1_	4	9606 - ANLN Actin-binding protein anillin	ANLN	anillin, actin binding protein
IPI00165393.1	0	4	4	3	0_1_1_1_	3	9606 - ANP32E Acidic leucine-rich nuclear phosphoprotein 32 family member E	ANP32E	acidic (leucine-rich) nuclear phosphoprotein 32 family, member E
IPI00218918.5	3	0	1	2	1_0_1_1_	3	9606 - ANXA1 Annexin A1	ANXA1	annexin A1
IPI00329801.12	2	2	1	0	1_1_1_0_	3	9606 - ANXA5 Annexin A5	ANXA5	annexin A5
IPI00909772.2	2	0	2	2	1_0_1_1_	3	9606 - AP2M1 cDNA FLJ53069, highly similar to AP-2 complex subunit mu-1	AP2M1	adaptor-related protein complex 2, mu 1 subunit
IPI00719680.1	5	6	3	0	1_1_1_0_	3	9606 - AP3D1 Isoform 5 of AP-3 complex subunit delta-1	AP3D1	adaptor-related protein complex 3, delta 1 subunit
IPI00215911.3	14	6	7	6	1_1_1_1_	4	9606 - APEX1 DNA-(apurinic or apyrimidinic site) lyase	APEX1	APEX nuclease (multifunctional DNA repair enzyme) 1
IPI00643722.1	4	5	2	3	1_1_1_1_	4	9606 - ARID1A Isoform 1 of AT-rich interactive domain-containing protein 1A	ARID1A	AT rich interactive domain 1A (SWI-like)
IPI00328658.3	3	1	3	3	1_1_1_1_	4	9606 - ASH2L Isoform 1 of Set1/Ash2 histone methyltransferase complex subunit ASH2	ASH2L	ash2 (absent, small, or homeotic)-like (Drosophila)
IPI00171445.1	6	1	5	1	1_1_1_1_	4	9606 - ATAD1 Isoform 1 of ATPase family AAA domain-containing protein 1	ATAD1	ATPase family, AAA domain containing 1
IPI00289499.3	1	0	6	2	1_0_1_1_	3	9606 - ATIC Bifunctional purine biosynthesis protein PURH	ATIC	5-aminoimidazole-4-carboxamide ribonucleotide formyltransferase/IMP cyclohydrolase
IPI00099756.1	3	0	3	2	1_0_1_1_	3	9606 - AURKC Isoform 1 of Serine/threonine-protein kinase 13	AURKC	aurora kinase C
IPI00892541.2	4	3	5	2	1_1_1_1_	4	9606 - BAT3 HLA-B associated transcript 3	BAG6	BCL2-associated athanogene 6
IPI00026087.1	9	7	5	5	1_1_1_1_	4	9606 - BANF1 Barrier-to-autointegration factor	BANF1	barrier to autointegration factor 1
IPI00641829.5	17	9	14	9	1_1_1_1_	4	9606 - BAT1 Isoform 2 of Spliceosome RNA helicase BAT1	BAT1	HLA-B associated transcript 1
IPI00412415.2	8	4	0	4	1_1_0_1_	3	9606 - BAZ1A Isoform 1 of Bromodomain adjacent to zinc finger domain protein 1A	BAZ1A	bromodomain adjacent to zinc finger domain, 1A
IPI00069817.2	23	19	15	11	1_1_1_1_	4	9606 - BAZ1B Isoform 1 of Tyrosine-protein kinase BAZ1B	BAZ1B	bromodomain adjacent to zinc finger domain, 1B
IPI00006079.1	9	3	5	7	1_1_1_1_	4	9606 - BCLAF1 Isoform 1 of Bcl-2-associated transcription factor 1	BCLAF1	BCL2-associated transcription factor 1
IPI00218095.2	2	2	1	2	1_1_1_1_	4	9606 - BIRC5 Isoform 2 of Baculoviral IAP repeat-containing protein 5	BIRC5	baculoviral IAP repeat-containing 5
IPI00006099.1	14	7	3	7	1_1_1_1_	4	9606 - BMS1 Ribosome biogenesis protein BMS1 homolog	BMS1	BMS1 homolog, ribosome assembly protein (yeast)
IPI00181728.1	12	2	6	6	1_1_1_1_	4	9606 - BRIX1 Ribosome biogenesis protein BRX1 homolog	BRIX1	BRX1, biogenesis of ribosomes, homolog (S. cerevisiae)
IPI00013468.1	6	5	2	0	1_1_1_0_	3	9606 - BUB3 Isoform 1 of Mitotic checkpoint protein BUB3	BUB3	budding uninhibited by benzimidazoles 3 homolog (yeast)
IPI00922484.1	6	2	3	5	1_1_1_1_	4	9606 - - BUD31 homolog (Yeast), isoform CRA_b	BUD31	BUD31 homolog (S. cerevisiae)
IPI00792100.1	11	8	0	8	1_1_0_1_	3	9606 - C14orf166 CLE	C14orf166	chromosome 14 open reading frame 166
IPI00306017.3	0	2	1	1	0_1_1_1_	3	9606 - C15orf44 cDNA FLJ55475	C15orf44	chromosome 15 open reading frame 44
IPI00829707.1	1	1	1	0	1_1_1_0_	3	9606 - C17orf81 Isoform 4 of Dermal papilla-derived protein 6	C17orf81	chromosome 17 open reading frame 81
IPI00022225.3	5	0	2	3	1_0_1_1_	3	9606 - C19orf29 Isoform 2 of Uncharacterized protein C19orf29	C19orf29	chromosome 19 open reading frame 29
IPI00783987.2	2	2	3	2	1_1_1_1_	4	9606 - C3 Complement C3 (Fragment)	C3	complement component 3
IPI00025084.3	0	1	5	2	0_1_1_1_	3	9606 - CAPNS1 Calpain small subunit 1	CAPNS1	calpain, small subunit 1
IPI00783872.2	3	4	4	3	1_1_1_1_	4	9606 - CAPRIN1 Isoform 1 of Caprin-1	CAPRIN1	cell cycle associated protein 1
IPI00024871.1	2	1	3	1	1_1_1_1_	4	9606 - CBFB Isoform 2 of Core-binding factor subunit beta	CBFB	core-binding factor, beta subunit
IPI00297579.4	8	5	7	7	1_1_1_1_	4	9606 - CBX3 Chromobox protein homolog 3	CBX3	chromobox homolog 3
IPI00217357.2	3	4	4	0	1_1_1_0_	3	9606 - CCAR1 Isoform 1 of Cell division cycle and apoptosis regulator protein 1	CCAR1	cell division cycle and apoptosis regulator 1
IPI00745793.1	2	1	1	1	1_1_1_1_	4	9606 - CCNB1 G2/mitotic-specific cyclin-B1	CCNB1	cyclin B1
IPI00297779.7	9	0	15	10	1_0_1_1_	3	9606 - CCT2 T-complex protein 1 subunit beta	CCT2	chaperonin containing TCP1, subunit 2 (beta)
IPI00784090.2	0	16	23	4	0_1_1_1_	3	9606 - CCT8 T-complex protein 1 subunit theta	CCT8	chaperonin containing TCP1, subunit 8 (theta)
IPI00909484.1	3	1	6	3	1_1_1_1_	4	9606 - - cDNA FLJ54776, highly similar to Cell division control protein 42 homolog	CDC42	cell division cycle 42 (GTP binding protein, 25kDa)
IPI00300659.4	6	0	3	4	1_0_1_1_	3	9606 - CDC73 Parafibromin	CDC73	cell division cycle 73, Paf1/RNA polymerase II complex component, homolog (S. cerevisiae)
IPI00303099.2	3	2	0	1	1_1_0_1_	3	9606 - CDCA8 Borealin	CDCA8	cell division cycle associated 8
IPI00293963.4	3	0	1	3	1_0_1_1_	3	9606 - CDYL Isoform 1 of Chromodomain Y-like protein	CDYL	chromodomain protein, Y-like
IPI00455210.1	63	39	45	0	1_1_1_0_	3	9606 - CHD4 Isoform 2 of Chromodomain-helicase-DNA-binding protein 4	CHD4	chromodomain helicase DNA binding protein 4
IPI00152535.1	16	9	0	7	1_1_0_1_	3	9606 - CHD5 Chromodomain-helicase-DNA-binding protein 5	CHD5	chromodomain helicase DNA binding protein 5
IPI00239815.9	10	0	6	8	1_0_1_1_	3	9606 - CIRH1A Isoform 1 of Cirhin	CIRH1A	cirrhosis, autosomal recessive 1A (cirhin)
IPI00166865.3	3	2	1	1	1_1_1_1_	4	9606 - CISD2 CDGSH iron sulfur domain-containing protein 2	CISD2	CDGSH iron sulfur domain 2
IPI00141318.2	3	0	4	3	1_0_1_1_	3	9606 - CKAP4 Isoform 1 of Cytoskeleton-associated protein 4	CKAP4	cytoskeleton-associated protein 4
IPI00921422.1	23	18	0	10	1_1_0_1_	3	9606 - CKAP5 Isoform 3 of Cytoskeleton-associated protein 5	CKAP5	cytoskeleton associated protein 5
IPI00396279.3	11	0	2	3	1_0_1_1_	3	9606 - CLASP1 Isoform 1 of CLIP-associating protein 1	CLASP1	cytoplasmic linker associated protein 1
IPI00303158.3	4	0	1	1	1_0_1_1_	3	9606 - CMAS Isoform 1 of N-acylneuraminate cytidylyltransferase	CMAS	cytidine monophosphate N-acetylneuraminic acid synthetase
IPI00220219.6	4	4	6	1	1_1_1_1_	4	9606 - COPB2 Coatomer subunit beta'	COPB2	coatomer protein complex, subunit beta 2 (beta prime)
IPI00005740.1	1	1	1	1	1_1_1_1_	4	9606 - COX4NB Neighbor of COX4	COX4NB	COX4 neighbor
IPI00024403.1	2	0	1	1	1_0_1_1_	3	9606 - CPNE3 Copine-3	CPNE3	copine III
IPI00030654.1	5	6	7	5	1_1_1_1_	4	9606 - CPSF6 Isoform 2 of Cleavage and polyadenylation specificity factor subunit 6	CPSF6	cleavage and polyadenylation specific factor 6, 68kDa
IPI00915356.1	2	0	2	3	1_0_1_1_	3	9606 - CPSF7 pre-mRNA cleavage factor I, 59 kDa subunit isoform 1	CPSF7	cleavage and polyadenylation specific factor 7, 59kDa
IPI00016613.2	8	3	6	0	1_1_1_0_	3	9606 - CSNK2A1 CSNK2A1 protein	CSNK2A1	casein kinase 2, alpha 1 polypeptide
IPI00640088.1	2	2	2	4	1_1_1_1_	4	9606 - CSNK2B Casein kinase 2, beta polypeptide, isoform CRA_d	CSNK2B	casein kinase 2, beta polypeptide
IPI00383704.6	1	0	1	1	1_0_1_1_	3	9606 - DULLARD Serine/threonine-protein phosphatase dullard	CTDNEP1	CTD nuclear envelope phosphatase 1
IPI00942869.1	13	0	15	12	1_0_1_1_	3	9606 - CTNND1 Isoform 1ABC of Catenin delta-1	CTNND1	catenin (cadherin-associated protein), delta 1
IPI00470674.5	0	1	2	2	0_1_1_1_	3	9606 - CYB5R1 NADH-cytochrome b5 reductase 1	CYB5R1	cytochrome b5 reductase 1
IPI00165230.1	1	0	3	2	1_0_1_1_	3	9606 - DAZAP1 Isoform 1 of DAZ-associated protein 1	DAZAP1	DAZ associated protein 1
IPI00297084.7	3	0	5	2	1_0_1_1_	3	9606 - DDOST Dolichyl-diphosphooligosaccharide--protein glycosyltransferase 48 kDa subunit	DDOST	dolichyl-diphosphooligosaccharide--protein glycosyltransferase
IPI00293655.3	0	12	11	14	0_1_1_1_	3	9606 - DDX1 ATP-dependent RNA helicase DDX1	DDX1	DEAD (Asp-Glu-Ala-Asp) box polypeptide 1
IPI00297900.4	4	4	1	0	1_1_1_0_	3	9606 - DDX10 Probable ATP-dependent RNA helicase DDX10	DDX10	DEAD (Asp-Glu-Ala-Asp) box polypeptide 10
IPI00940000.1	0	16	22	16	0_1_1_1_	3	9606 - DDX17 DEAD box polypeptide 17 isoform 3	DDX17	DEAD (Asp-Glu-Ala-Asp) box polypeptide 17
IPI00015953.3	17	13	13	18	1_1_1_1_	4	9606 - DDX21 Isoform 1 of Nucleolar RNA helicase 2	DDX21	DEAD (Asp-Glu-Ala-Asp) box polypeptide 21
IPI00329791.13	3	5	3	2	1_1_1_1_	4	9606 - DDX46 cDNA FLJ78679, highly similar to Homo sapiens DEAD (Asp-Glu-Ala-Asp) box polypeptide 46 (DDX46), mRNA	DDX46	DEAD (Asp-Glu-Ala-Asp) box polypeptide 46
IPI00217541.3	0	1	2	1	0_1_1_1_	3	9606 - DDX51 ATP-dependent RNA helicase DDX51	DDX51	DEAD (Asp-Glu-Ala-Asp) box polypeptide 51
IPI00940755.1	0	3	2	1	0_1_1_1_	3	9606 - DENR Putative uncharacterized protein DENR	DENR	density-regulated protein
IPI00871742.3	4	5	0	5	1_1_0_1_	3	9606 - DNM1L Dynamin 1-like, isoform CRA_c	DNM1L	dynamin 1-like
IPI00329216.3	3	0	1	2	1_0_1_1_	3	9606 - DNMT3A Isoform 1 of DNA (cytosine-5)-methyltransferase 3A	DNMT3A	DNA (cytosine-5-)-methyltransferase 3 alpha
IPI00456969.1	50	60	42	25	1_1_1_1_	4	9606 - DYNC1H1 Cytoplasmic dynein 1 heavy chain 1	DYNC1H1	dynein, cytoplasmic 1, heavy chain 1
IPI00396485.3	67	42	49	0	1_1_1_0_	3	9606 - EEF1A1 Elongation factor 1-alpha 1	EEF1A1	eukaryotic translation elongation factor 1 alpha 1
IPI00000875.7	16	9	0	9	1_1_0_1_	3	9606 - TUT1;EEF1G cDNA FLJ56389, highly similar to Elongation factor 1-gamma	EEF1G;TUT1	eukaryotic translation elongation factor 1 gamma
IPI00017184.2	8	16	16	13	1_1_1_1_	4	9606 - EHD1 EH domain-containing protein 1	EHD1	EH-domain containing 1
IPI00005578.1	6	12	12	8	1_1_1_1_	4	9606 - EHD4 EH domain-containing protein 4	EHD4	EH-domain containing 4
IPI00021728.3	7	7	5	7	1_1_1_1_	4	9606 - EIF2S2 Eukaryotic translation initiation factor 2 subunit 2	EIF2S2	eukaryotic translation initiation factor 2, subunit 2 beta, 38kDa
IPI00654777.2	7	4	10	5	1_1_1_1_	4	9606 - EIF3F cDNA FLJ36192 fis, clone TESTI2027450, highly similar to Eukaryotic translation initiation factor 3 subunit 5	EIF3F	eukaryotic translation initiation factor 3, subunit F
IPI00022648.2	1	3	3	0	1_1_1_0_	3	9606 - EIF5 Eukaryotic translation initiation factor 5	EIF5	eukaryotic translation initiation factor 5
IPI00376005.2	17	10	16	15	1_1_1_1_	4	9606 - EIF5A Isoform 2 of Eukaryotic translation initiation factor 5A-1	EIF5A	eukaryotic translation initiation factor 5A
IPI00299254.4	10	5	9	0	1_1_1_0_	3	9606 - EIF5B Eukaryotic translation initiation factor 5B	EIF5B	eukaryotic translation initiation factor 5B
IPI00015973.1	0	1	3	3	0_1_1_1_	3	9606 - EPB41L2 Band 4.1-like protein 2	EPB41L2	erythrocyte membrane protein band 4.1-like 2
IPI00647286.1	3	2	2	0	1_1_1_0_	3	9606 - FAM129B hypothetical protein LOC64855 isoform 1	FAM129B	family with sequence similarity 129, member B
IPI00300074.3	2	0	4	2	1_0_1_1_	3	9606 - FARSB Phenylalanyl-tRNA synthetase beta chain	FARSB	phenylalanyl-tRNA synthetase, beta subunit
IPI00026215.1	5	4	1	2	1_1_1_1_	4	9606 - FEN1 Flap endonuclease 1	FEN1	flap structure-specific endonuclease 1
IPI00913848.1	4	5	0	3	1_1_0_1_	3	9606 - FERMT2 fermitin family homolog 2 isoform 2	FERMT2	fermitin family member 2
IPI00296053.3	2	1	2	2	1_1_1_1_	4	9606 - FH Isoform Mitochondrial of Fumarate hydratase, mitochondrial	FH	fumarate hydratase
IPI00024157.1	4	3	5	0	1_1_1_0_	3	9606 - FKBP3 Peptidyl-prolyl cis-trans isomerase FKBP3	FKBP3	FK506 binding protein 3, 25kDa
IPI00333541.6	74	45	63	37	1_1_1_1_	4	9606 - FLNA Isoform 1 of Filamin-A	FLNA	filamin A, alpha
IPI00900293.1	18	6	14	3	1_1_1_1_	4	9606 - FLNB filamin B isoform 1	FLNB	filamin B, beta
IPI00855785.1	6	7	0	4	1_1_0_1_	3	9606 - FN1 Isoform 15 of Fibronectin	FN1	fibronectin 1
IPI00295556.3	1	1	0	1	1_1_0_1_	3	9606 - FOSB Protein fosB	FOSB	FBJ murine osteosarcoma viral oncogene homolog B
IPI00260715.5	10	8	0	5	1_1_0_1_	3	9606 - FUS Fus-like protein (Fragment)	FUS	fused in sarcoma
IPI00004669.1	0	2	2	1	0_1_1_1_	3	9606 - GALNT2 Polypeptide N-acetylgalactosaminyltransferase 2	GALNT2	UDP-N-acetyl-alpha-D-galactosamine:polypeptide N-acetylgalactosaminyltransferase 2 (GalNAc-T2)
IPI00219018.7	18	21	22	17	1_1_1_1_	4	9606 - GAPDH Glyceraldehyde-3-phosphate dehydrogenase	GAPDH	glyceraldehyde-3-phosphate dehydrogenase
IPI00022430.1	3	11	5	5	1_1_1_1_	4	9606 - GAPDHS Glyceraldehyde-3-phosphate dehydrogenase, testis-specific	GAPDHS	glyceraldehyde-3-phosphate dehydrogenase, spermatogenic
IPI00025273.1	2	0	5	2	1_0_1_1_	3	9606 - GART Isoform Long of Trifunctional purine biosynthetic protein adenosine-3	GART	phosphoribosylglycinamide formyltransferase, phosphoribosylglycinamide synthetase, phosphoribosylaminoimidazole synthetase
IPI00478128.2	3	0	2	3	1_0_1_1_	3	9606 - GATAD2A Putative uncharacterized protein GATAD2A	GATAD2A	GATA zinc finger domain containing 2A
IPI00031461.2	3	0	2	1	1_0_1_1_	3	9606 - GDI2 cDNA FLJ60299, highly similar to Rab GDP dissociation inhibitor beta	GDI2	GDP dissociation inhibitor 2
IPI00945964.1	6	5	8	3	1_1_1_1_	4	9606 - GFM1 Isoform 2 of Elongation factor G, mitochondrial	GFM1	G elongation factor, mitochondrial 1
IPI00000155.8	9	4	3	6	1_1_1_1_	4	9606 - GLYR1 Cytokine-like nuclear factor n-pac, isoform CRA_a	GLYR1	glyoxylate reductase 1 homolog (Arabidopsis)
IPI00005132.3	0	4	2	3	0_1_1_1_	3	9606 - GNL3L Guanine nucleotide-binding protein-like 3-like protein	GNL3L	guanine nucleotide binding protein-like 3 (nucleolar)-like
IPI00884192.1	2	2	3	0	1_1_1_0_	3	9606 - GPX4 glutathione peroxidase 4 isoform C precursor	GPX4	glutathione peroxidase 4 (phospholipid hydroperoxidase)
IPI00910513.1	3	5	8	2	1_1_1_1_	4	9606 - GSPT1 G1 to S phase transition 1 isoform 1	GSPT1	G1 to S phase transition 1
IPI00016725.2	3	5	1	1	1_1_1_1_	4	9606 - GTF3C4 General transcription factor 3C polypeptide 4	GTF3C4	general transcription factor IIIC, polypeptide 4, 90kDa
IPI00385042.4	10	12	0	8	1_1_0_1_	3	9606 - GTPBP4 Nucleolar GTP-binding protein 1	GTPBP4	GTP binding protein 4
IPI00304171.6	0	6	15	16	0_1_1_1_	3	9606 - H2AFY Isoform 2 of Core histone macro-H2A.1	H2AFY	H2A histone family, member Y
IPI00219038.9	18	8	0	16	1_1_0_1_	3	9606 - LOC644914;H3F3B;LOC440926;H3F3A Histone H3.3	H3F3A;H3F3B;LOC644914;LOC440926	H3 histone, family 3
IPI00746623.2	2	1	1	1	1_1_1_1_	4	9606 - HABP2 Hyaluronan-binding protein 2	HABP2	hyaluronan binding protein 2
IPI00410714.5	8	2	6	4	1_1_1_1_	4	9606 - HBA2;HBA1 Hemoglobin subunit alpha	HBA2;HBA1	hemoglobin, alpha
IPI00289601.10	14	13	11	9	1_1_1_1_	4	9606 - HDAC2 Isoform 2 of Histone deacetylase 2	HDAC2	histone deacetylase 2
IPI00024279.4	7	0	4	5	1_0_1_1_	3	9606 - HEATR1 HEAT repeat-containing protein 1	HEATR1	HEAT repeat containing 1
IPI00794461.1	43	24	21	23	1_1_1_1_	4	9606 - HIST1H2BN Histone H2B type 1-N	HIST1H2BN	histone cluster 1, H2bn
IPI00930174.1	0	24	21	23	0_1_1_1_	3	9606 - HIST2H2BF histone cluster 2, H2bf isoform b	HIST2H2BF	histone cluster 2, H2bf
IPI00171611.7	16	8	14	17	1_1_1_1_	4	9606 - HIST2H3D;HIST2H3A;HIST2H3C Histone H3.2	HIST2H3D;HIST2H3A;HIST2H3C	histone cluster 2, H3
IPI00759481.1	2	0	1	3	1_0_1_1_	3	9606 - HMGA2 HMGA2e'	HMGA2	high mobility group AT-hook 2
IPI00028888.1	6	4	10	11	1_1_1_1_	4	9606 - HNRNPD Isoform 1 of Heterogeneous nuclear ribonucleoprotein D0	HNRNPD	heterogeneous nuclear ribonucleoprotein D (AU-rich element RNA binding protein 1, 37kDa)
IPI00479191.2	10	12	12	8	1_1_1_1_	4	9606 - HNRNPH1 51 kDa protein	HNRNPH1	heterogeneous nuclear ribonucleoprotein H1 (H)
IPI00013877.2	0	2	2	1	0_1_1_1_	3	9606 - HNRNPH3 Isoform 1 of Heterogeneous nuclear ribonucleoprotein H3	HNRNPH3	heterogeneous nuclear ribonucleoprotein H3 (2H9)
IPI00012074.3	7	14	14	0	1_1_1_0_	3	9606 - HNRNPR Isoform 1 of Heterogeneous nuclear ribonucleoprotein R	HNRNPR	heterogeneous nuclear ribonucleoprotein R
IPI00883857.2	0	27	36	39	0_1_1_1_	3	9606 - HNRNPU Isoform Long of Heterogeneous nuclear ribonucleoprotein U	HNRNPU	heterogeneous nuclear ribonucleoprotein U (scaffold attachment factor A)
IPI00011274.3	6	1	6	5	1_1_1_1_	4	9606 - HNRPDL Isoform 1 of Heterogeneous nuclear ribonucleoprotein D-like	HNRPDL	heterogeneous nuclear ribonucleoprotein D-like
IPI00642238.4	16	9	10	8	1_1_1_1_	4	9606 - HP1BP3 Isoform 1 of Heterochromatin protein 1-binding protein 3	HP1BP3	heterochromatin protein 1, binding protein 3
IPI00022488.1	17	13	19	3	1_1_1_1_	4	9606 - HPX Hemopexin	HPX	hemopexin
IPI00955780.1	1	1	0	1	1_1_0_1_	3	9606 - - Hydroxysteroid (17-beta) dehydrogenase 12, isoform CRA_a	HSD17B12	hydroxysteroid (17-beta) dehydrogenase 12
IPI00382470.3	34	28	48	25	1_1_1_1_	4	9606 - HSP90AA1 Isoform 2 of Heat shock protein HSP 90-alpha	HSP90AA1	heat shock protein 90kDa alpha (cytosolic), class A member 1
IPI00003362.2	14	16	0	6	1_1_0_1_	3	9606 - HSPA5 HSPA5 protein	HSPA5	heat shock 70kDa protein 5 (glucose-regulated protein, 78kDa)
IPI00000877.1	8	8	14	6	1_1_1_1_	4	9606 - HYOU1 Hypoxia up-regulated protein 1	HYOU1	hypoxia up-regulated 1
IPI00304417.7	1	0	1	2	1_0_1_1_	3	9606 - IDH3B Isocitrate dehydrogenase 3, beta subunit isoform a precursor	IDH3B	isocitrate dehydrogenase 3 (NAD+) beta
IPI00293735.2	2	0	5	2	1_0_1_1_	3	9606 - IKBKAP Elongator complex protein 1	IKBKAP	inhibitor of kappa light polypeptide gene enhancer in B-cells, kinase complex-associated protein
IPI00291510.3	17	7	7	0	1_1_1_0_	3	9606 - IMPDH2 Inosine-5'-monophosphate dehydrogenase 2	IMPDH2	IMP (inosine 5'-monophosphate) dehydrogenase 2
IPI00001508.1	12	5	13	4	1_1_1_1_	4	9606 - INS;INS-IGF2 Insulin	INS;INS-IGF2	insulin
IPI00740961.5	9	0	4	5	1_0_1_1_	3	9606 - INTS1 DKFZP586J0619 protein	INTS1	integrator complex subunit 1
IPI00304676.5	5	1	1	1	1_1_1_1_	4	9606 - INTS5 Integrator complex subunit 5	INTS5	integrator complex subunit 5
IPI00180730.1	31	16	24	16	1_1_1_1_	4	9606 - - Similar to Elongation factor 1-alpha 1	IPI00180730.1
IPI00249267.2	8	6	3	7	1_1_1_1_	4	9606 - - 13 kDa protein	IPI00249267.2
IPI00453476.2	9	11	17	8	1_1_1_1_	4	9606 - - 29 kDa protein	IPI00453476.2
IPI00790743.1	1	0	3	1	1_0_1_1_	3	9606 - - Protein	IPI00790743.1
IPI00879148.1	3	3	3	3	1_1_1_1_	4	9606 - - 18 kDa protein	IPI00879148.1
IPI00939304.1	15	19	32	6	1_1_1_1_	4	9606 - IPO5 Isoform 3 of Importin-5	IPO5	importin 5
IPI00009342.1	22	25	24	0	1_1_1_0_	3	9606 - IQGAP1 Ras GTPase-activating-like protein IQGAP1	IQGAP1	IQ motif containing GTPase activating protein 1
IPI00061780.1	1	0	2	2	1_0_1_1_	3	9606 - ITCH Isoform 1 of E3 ubiquitin-protein ligase Itchy homolog	ITCH	itchy E3 ubiquitin protein ligase homolog (mouse)
IPI00291607.2	11	3	6	2	1_1_1_1_	4	9606 - ITPR3 Inositol 1,4,5-trisphosphate receptor type 3	ITPR3	inositol 1,4,5-triphosphate receptor, type 3
IPI00013439.3	0	1	4	2	0_1_1_1_	3	9606 - JUNB Transcription factor jun-B	JUNB	jun B proto-oncogene
IPI00306871.4	4	0	2	1	1_0_1_1_	3	9606 - KAT2A Isoform 1 of Histone acetyltransferase KAT2A	KAT2A	K(lysine) acetyltransferase 2A
IPI00442307.1	7	0	1	3	1_0_1_1_	3	9606 - KCNAB2 cDNA FLJ16180 fis, clone BRHIP3000240, highly similar to Homo sapiens potassium channel beta 2 subunit (HKvbeta2.2) mRNA	KCNAB2	potassium voltage-gated channel, shaker-related subfamily, beta member 2
IPI00217540.7	10	2	6	4	1_1_1_1_	4	9606 - KDM1A Isoform 2 of Lysine-specific histone demethylase 1	KDM1A	lysine (K)-specific demethylase 1A
IPI00791325.1	9	6	0	6	1_1_0_1_	3	9606 - KIAA0020 Pumilio domain-containing protein KIAA0020	KIAA0020	KIAA0020
IPI00305289.2	12	10	6	0	1_1_1_0_	3	9606 - KIF11 Kinesin-like protein KIF11	KIF11	kinesin family member 11
IPI00024975.2	4	4	3	0	1_1_1_0_	3	9606 - KIF15 Isoform 1 of Kinesin-like protein KIF15	KIF15	kinesin family member 15
IPI00000769.2	3	4	0	3	1_1_0_1_	3	9606 - KIF22 Kinesin-like protein KIF22	KIF22	kinesin family member 22
IPI00290435.3	9	6	3	3	1_1_1_1_	4	9606 - KIF2C Isoform 1 of Kinesin-like protein KIF2C	KIF2C	kinesin family member 2C
IPI00303292.1	7	3	2	3	1_1_1_1_	4	9606 - KPNA1 Importin subunit alpha-1	KPNA1	karyopherin alpha 1 (importin alpha 5)
IPI00220327.4	22	30	53	20	1_1_1_1_	4	9606 - KRT1 Keratin, type II cytoskeletal 1	KRT1	keratin 1
IPI00217963.3	4	6	6	0	1_1_1_0_	3	9606 - KRT16 Keratin, type I cytoskeletal 16	KRT16	keratin 16
IPI00019359.4	10	0	22	12	1_0_1_1_	3	9606 - KRT9 Keratin, type I cytoskeletal 9	KRT9	keratin 9
IPI00219841.6	10	5	3	3	1_1_1_1_	4	9606 - LIG1 DNA ligase 1	LIG1	ligase I, DNA, ATP-dependent
IPI00021405.3	52	43	54	0	1_1_1_0_	3	9606 - LMNA Isoform A of Lamin-A/C	LMNA	lamin A/C
IPI00217975.4	29	26	40	38	1_1_1_1_	4	9606 - LMNB1 Lamin-B1	LMNB1	lamin B1
IPI00396321.1	15	7	11	11	1_1_1_1_	4	9606 - LRRC59 Leucine-rich repeat-containing protein 59	LRRC59	leucine rich repeat containing 59
IPI00071318.1	3	0	1	2	1_0_1_1_	3	9606 - LUC7L Isoform 1 of Putative RNA-binding protein Luc7-like 1	LUC7L	LUC7-like (S. cerevisiae)
IPI00332428.5	3	3	2	3	1_1_1_1_	4	9606 - MAK16 Protein MAK16 homolog	MAK16	MAK16 homolog (S. cerevisiae)
IPI00396171.4	6	0	2	2	1_0_1_1_	3	9606 - MAP4 Isoform 1 of Microtubule-associated protein 4	MAP4	microtubule-associated protein 4
IPI00604647.1	0	1	4	2	0_1_1_1_	3	9606 - MAP4K4 mitogen-activated protein kinase kinase kinase kinase 4 isoform 2	MAP4K4	mitogen-activated protein kinase kinase kinase kinase 4
IPI00414168.1	1	1	2	0	1_1_1_0_	3	9606 - MARCH5 E3 ubiquitin-protein ligase MARCH5	MARCH5	membrane-associated ring finger (C3HC4) 5
IPI00789551.1	8	10	11	12	1_1_1_1_	4	9606 - MATR3 Putative uncharacterized protein MATR3	MATR3	matrin 3
IPI00008800.3	3	1	1	3	1_1_1_1_	4	9606 - MAZ Similar to Serum amyloid A-activating factor SAF-1	MAZ	MYC-associated zinc finger protein (purine-binding transcription factor)
IPI00922181.1	4	2	4	3	1_1_1_1_	4	9606 - MCM2 cDNA FLJ53276, moderately similar to DNA replication licensing factor MCM2	MCM2	minichromosome maintenance complex component 2
IPI00011201.1	6	0	2	4	1_0_1_1_	3	9606 - ME2 NAD-dependent malic enzyme, mitochondrial	ME2	malic enzyme 2, NAD(+)-dependent, mitochondrial
IPI00004068.2	0	2	4	2	0_1_1_1_	3	9606 - MED12 Mediator of RNA polymerase II transcription subunit 12	MED12	mediator complex subunit 12
IPI00032780.2	1	1	1	0	1_1_1_0_	3	9606 - MED29 Intersex-like	MED29	mediator complex subunit 29
IPI00639812.1	2	0	4	2	1_0_1_1_	3	9606 - MGST3 Microsomal glutathione S-transferase 3	MGST3	microsomal glutathione S-transferase 3
IPI00029159.5	2	1	1	1	1_1_1_1_	4	9606 - MRE11A cDNA FLJ38069 fis, clone CTONG2015434, highly similar to DOUBLE-STRAND BREAK REPAIR PROTEIN MRE11A	MRE11A	MRE11 meiotic recombination 11 homolog A (S. cerevisiae)
IPI00219365.3	19	0	21	13	1_0_1_1_	3	9606 - MSN Moesin	MSN	moesin
IPI00291646.3	4	5	7	5	1_1_1_1_	4	9606 - MTHFD1L Methylenetetrahydrofolate dehydrogenase (NADP+ dependent) 1-like	MTHFD1L	methylenetetrahydrofolate dehydrogenase (NADP+ dependent) 1-like
IPI00013678.2	3	1	1	0	1_1_1_0_	3	9606 - MTX1 Isoform 1 of Metaxin-1	MTX1	metaxin 1
IPI00607584.1	8	2	3	5	1_1_1_1_	4	9606 - MYBBP1A Isoform 2 of Myb-binding protein 1A	MYBBP1A	MYB binding protein (P160) 1a
IPI00019502.3	37	53	77	29	1_1_1_1_	4	9606 - MYH9 Isoform 1 of Myosin-9	MYH9	myosin, heavy chain 9, non-muscle
IPI00604523.1	1	2	2	1	1_1_1_1_	4	9606 - MYL12A Myosin regulatory light chain MRCL3 variant	MYL12A	myosin, light chain 12A, regulatory, non-sarcomeric
IPI00796366.2	0	7	6	4	0_1_1_1_	3	9606 - MYL6 cDNA FLJ56329, highly similar to Myosin light polypeptide 6	MYL6	myosin, light chain 6, alkali, smooth muscle and non-muscle
IPI00743335.2	18	9	5	9	1_1_1_1_	4	9606 - MYO1C Isoform 1 of Myosin-Ic	MYO1C	myosin IC
IPI00021048.1	10	5	7	4	1_1_1_1_	4	9606 - MYOF Isoform 1 of Myoferlin	MYOF	myoferlin
IPI00386189.2	3	2	6	7	1_1_1_1_	4	9606 - NAA15 Isoform 1 of NMDA receptor-regulated protein 1	NAA15	N(alpha)-acetyltransferase 15, NatA auxiliary subunit
IPI00332499.1	1	1	3	0	1_1_1_0_	3	9606 - NASP Isoform 3 of Nuclear autoantigenic sperm protein	NASP	nuclear autoantigenic sperm protein (histone-binding)
IPI00106495.1	1	2	2	0	1_1_1_0_	3	9606 - NCAPG Condensin complex subunit 3	NCAPG	non-SMC condensin I complex, subunit G
IPI00029795.1	3	2	1	2	1_1_1_1_	4	9606 - NFIC Isoform 4 of Nuclear factor 1 C-type	NFIC	nuclear factor I/C (CCAAT-binding transcription factor)
IPI00893746.1	16	0	15	7	1_0_1_1_	3	9606 - NHP2L1 NHP2 non-histone chromosome protein 2-like 1	NHP2L1	NHP2 non-histone chromosome protein 2-like 1 (S. cerevisiae)
IPI00007175.3	10	3	5	7	1_1_1_1_	4	9606 - NIP7 Isoform 1 of 60S ribosome subunit biogenesis protein NIP7 homolog	NIP7	nuclear import 7 homolog (S. cerevisiae)
IPI00436632.1	0	3	2	2	0_1_1_1_	3	9606 - NIPBL Isoform 1 of Nipped-B-like protein	NIPBL	Nipped-B homolog (Drosophila)
IPI00022373.2	1	3	2	0	1_1_1_0_	3	9606 - NOB1 RNA-binding protein NOB1	NOB1	NIN1/RPN12 binding protein 1 homolog (S. cerevisiae)
IPI00152890.1	5	0	2	1	1_0_1_1_	3	9606 - NOL6 Isoform 1 of Nucleolar protein 6	NOL6	nucleolar protein family 6 (RNA-associated)
IPI00145593.7	2	0	1	4	1_0_1_1_	3	9606 - NOM1 Nucleolar MIF4G domain-containing protein 1	NOM1	nucleolar protein with MIF4G domain 1
IPI00304596.3	27	19	24	29	1_1_1_1_	4	9606 - NONO Non-POU domain-containing octamer-binding protein	NONO	non-POU domain containing, octamer-binding
IPI00411937.4	32	17	25	27	1_1_1_1_	4	9606 - NOP56 Nucleolar protein 56	NOP56	NOP56 ribonucleoprotein homolog (yeast)
IPI00006379.1	27	12	22	28	1_1_1_1_	4	9606 - NOP58 Nucleolar protein 58	NOP58	NOP58 ribonucleoprotein homolog (yeast)
IPI00001676.9	1	1	2	0	1_1_1_0_	3	9606 - NPLOC4 Isoform 2 of Nuclear protein localization protein 4 homolog	NPLOC4	nuclear protein localization 4 homolog (S. cerevisiae)
IPI00026496.3	4	1	3	3	1_1_1_1_	4	9606 - NPM3 Nucleoplasmin-3	NPM3	nucleophosmin/nucleoplasmin 3
IPI00783118.2	2	0	1	1	1_0_1_1_	3	9606 - NT5DC2 5'-nucleotidase domain containing 2 isoform 1	NT5DC2	5'-nucleotidase domain containing 2
IPI00872028.2	5	12	7	4	1_1_1_1_	4	9606 - NUMA1 NUMA1 variant protein (Fragment)	NUMA1	nuclear mitotic apparatus protein 1
IPI00028005.1	10	7	5	7	1_1_1_1_	4	9606 - NUP107 Nuclear pore complex protein Nup107	NUP107	nucleoporin 107kDa
IPI00291200.2	4	4	3	3	1_1_1_1_	4	9606 - NUP133 Nuclear pore complex protein Nup133	NUP133	nucleoporin 133kDa
IPI00910194.1	7	0	3	3	1_0_1_1_	3	9606 - NUP153 cDNA FLJ60565, highly similar to Nuclear pore complex protein Nup153	NUP153	nucleoporin 153kDa
IPI00748807.2	19	5	9	13	1_1_1_1_	4	9606 - NUP160 Isoform 1 of Nuclear pore complex protein Nup160	NUP160	nucleoporin 160kDa
IPI00783781.1	26	9	20	17	1_1_1_1_	4	9606 - NUP205 Nuclear pore complex protein Nup205	NUP205	nucleoporin 205kDa
IPI00646361.3	5	4	4	5	1_1_1_1_	4	9606 - NUP214 Isoform 5 of Nuclear pore complex protein Nup214	NUP214	nucleoporin 214kDa
IPI00329650.1	5	5	6	0	1_1_1_0_	3	9606 - NUP35 Nucleoporin NUP53	NUP35	nucleoporin 35kDa
IPI00397904.6	18	17	16	7	1_1_1_1_	4	9606 - NUP93 Nuclear pore complex protein Nup93	NUP93	nucleoporin 93kDa
IPI00337397.1	7	8	10	0	1_1_1_0_	3	9606 - NUP98 Isoform 5 of Nuclear pore complex protein Nup98-Nup96	NUP98	nucleoporin 98kDa
IPI00033153.1	5	0	1	5	1_0_1_1_	3	9606 - NXF1 Nuclear RNA export factor 1	NXF1	nuclear RNA export factor 1
IPI00005780.3	3	0	3	1	1_0_1_1_	3	9606 - OGT Isoform 3 of UDP-N-acetylglucosamine--peptide N-acetylglucosaminyltransferase 110 kDa subunit	OGT	O-linked N-acetylglucosamine (GlcNAc) transferase (UDP-N-acetylglucosamine:polypeptide-N-acetylglucosaminyl transferase)
IPI00916847.1	3	3	9	1	1_1_1_1_	4	9606 - OLA1 47 kDa protein	OLA1	Obg-like ATPase 1
IPI00015164.4	3	1	0	1	1_1_0_1_	3	9606 - ORC4 Origin recognition complex subunit 4	ORC4	origin recognition complex, subunit 4
IPI00299000.5	17	0	18	11	1_0_1_1_	3	9606 - PA2G4 Proliferation-associated protein 2G4	PA2G4	proliferation-associated 2G4, 38kDa
IPI00807557.1	18	7	18	0	1_1_1_0_	3	9606 - PA2G4 PA2G4 protein (Fragment)	PA2G4	proliferation-associated 2G4, 38kDa
IPI00217223.1	8	0	14	10	1_0_1_1_	3	9606 - PAICS Multifunctional protein ADE2	PAICS	phosphoribosylaminoimidazole carboxylase, phosphoribosylaminoimidazole succinocarboxamide synthetase
IPI00449049.5	0	15	19	20	0_1_1_1_	3	9606 - PARP1 Poly [ADP-ribose] polymerase 1	PARP1	poly (ADP-ribose) polymerase 1
IPI00796337.1	7	11	0	6	1_1_0_1_	3	9606 - PCBP2 poly(rC) binding protein 2 isoform a	PCBP2	poly(rC) binding protein 2
IPI00014865.4	1	0	1	1	1_0_1_1_	3	9606 - PCIF1 cDNA FLJ61655, highly similar to Phosphorylated CTD-interacting factor 1	PCIF1	PDX1 C-terminal inhibiting factor 1
IPI00306301.2	5	0	4	1	1_0_1_1_	3	9606 - PDHA1 Mitochondrial PDHA1	PDHA1	pyruvate dehydrogenase (lipoamide) alpha 1
IPI00025252.1	4	10	7	0	1_1_1_0_	3	9606 - PDIA3 Protein disulfide-isomerase A3	PDIA3	protein disulfide isomerase family A, member 3
IPI00220739.3	1	2	2	0	1_1_1_0_	3	9606 - PGRMC1 Membrane-associated progesterone receptor component 1	PGRMC1	progesterone receptor membrane component 1
IPI00292750.3	2	1	1	0	1_1_1_0_	3	9606 - PHF12 Isoform 1 of PHD finger protein 12	PHF12	PHD finger protein 12
IPI00472782.1	1	0	1	1	1_0_1_1_	3	9606 - PHF14 PHD finger protein 14 isoform 1	PHF14	PHD finger protein 14
IPI00552149.2	3	0	3	1	1_0_1_1_	3	9606 - PHF6 PHD finger protein 6, isoform CRA_d	PHF6	PHD finger protein 6
IPI00871890.1	4	6	5	5	1_1_1_1_	4	9606 - PICALM Putative uncharacterized protein PICALM	PICALM	phosphatidylinositol binding clathrin assembly protein
IPI00941899.1	20	16	0	10	1_1_0_1_	3	9606 - PKM2 66 kDa protein	PKM2	pyruvate kinase, muscle
IPI00014898.3	101	88	96	0	1_1_1_0_	3	9606 - PLEC Isoform 1 of Plectin-1	PLEC	plectin
IPI00019580.1	3	3	4	0	1_1_1_0_	3	9606 - PLG Plasminogen	PLG	plasminogen
IPI00021248.1	9	5	0	2	1_1_0_1_	3	9606 - PLK1 Serine/threonine-protein kinase PLK1	PLK1	polo-like kinase 1
IPI00002624.1	0	5	2	4	0_1_1_1_	3	9606 - PLRG1 Isoform 1 of Pleiotropic regulator 1	PLRG1	pleiotropic regulator 1 (PRL1 homolog, Arabidopsis)
IPI00005179.1	2	6	1	3	1_1_1_1_	4	9606 - POLR1C Isoform 1 of DNA-directed RNA polymerases I and III subunit RPAC1	POLR1C	polymerase (RNA) I polypeptide C, 30kDa
IPI00007283.1	1	0	1	1	1_0_1_1_	3	9606 - POLR2D DNA-directed RNA polymerase II subunit RPB4	POLR2D	polymerase (RNA) II (DNA directed) polypeptide D
IPI00939871.1	3	0	2	1	1_0_1_1_	3	9606 - POLR2J3 19 kDa protein	POLR2J3	polymerase (RNA) II (DNA directed) polypeptide J3
IPI00646304.4	11	13	11	10	1_1_1_1_	4	9606 - PPIB Peptidyl-prolyl cis-trans isomerase B	PPIB	peptidylprolyl isomerase B (cyclophilin B)
IPI00006167.1	2	2	1	0	1_1_1_0_	3	9606 - PPM1G Protein phosphatase 1G	PPM1G	protein phosphatase, Mg2+/Mn2+ dependent, 1G
IPI00218236.6	20	11	11	11	1_1_1_1_	4	9606 - PPP1CB Serine/threonine-protein phosphatase PP1-beta catalytic subunit	PPP1CB	protein phosphatase 1, catalytic subunit, beta isozyme
IPI00000874.1	6	5	0	7	1_1_0_1_	3	9606 - PRDX1 Peroxiredoxin-1	PRDX1	peroxiredoxin 1
IPI00027350.3	2	2	2	2	1_1_1_1_	4	9606 - PRDX2 Peroxiredoxin-2	PRDX2	peroxiredoxin 2
IPI00018098.4	4	2	2	3	1_1_1_1_	4	9606 - PRPF38B Isoform 1 of Pre-mRNA-splicing factor 38B	PRPF38B	PRP38 pre-mRNA processing factor 38 (yeast) domain containing B
IPI00337386.3	7	10	0	9	1_1_0_1_	3	9606 - PRPF40A Isoform 2 of Pre-mRNA-processing factor 40 homolog A	PRPF40A	PRP40 pre-mRNA processing factor 40 homolog A (S. cerevisiae)
IPI00909774.2	6	0	7	8	1_0_1_1_	3	9606 - PRPF40A cDNA FLJ59286, highly similar to Pre-mRNA-processing factor 40 homolog A	PRPF40A	PRP40 pre-mRNA processing factor 40 homolog A (S. cerevisiae)
IPI00305068.5	0	14	14	13	0_1_1_1_	3	9606 - PRPF6 Pre-mRNA-processing factor 6	PRPF6	PRP6 pre-mRNA processing factor 6 homolog (S. cerevisiae)
IPI00718888.1	4	0	10	2	1_0_1_1_	3	9606 - PRPS2 Isoform 2 of Ribose-phosphate pyrophosphokinase 2	PRPS2	phosphoribosyl pyrophosphate synthetase 2
IPI00028122.1	15	8	12	11	1_1_1_1_	4	9606 - PSIP1 Isoform 1 of PC4 and SFRS1-interacting protein	PSIP1	PC4 and SFRS1 interacting protein 1
IPI00154509.3	2	0	2	1	1_0_1_1_	3	9606 - PSMA8 Isoform 1 of Proteasome subunit alpha type-7-like	PSMA8	proteasome (prosome, macropain) subunit, alpha type, 8
IPI00025019.3	0	3	3	1	0_1_1_1_	3	9606 - PSMB1 Proteasome subunit beta type-1	PSMB1	proteasome (prosome, macropain) subunit, beta type, 1
IPI00011603.2	0	5	8	3	0_1_1_1_	3	9606 - PSMD3 26S proteasome non-ATPase regulatory subunit 3	PSMD3	proteasome (prosome, macropain) 26S subunit, non-ATPase, 3
IPI00793381.2	3	1	2	0	1_1_1_0_	3	9606 - PSMD6 Putative uncharacterized protein PSMD6	PSMD6	proteasome (prosome, macropain) 26S subunit, non-ATPase, 6
IPI00789101.1	4	5	8	2	1_1_1_1_	4	9606 - PTGES3 Prostaglandin E synthase 3 (Cytosolic), isoform CRA_c	PTGES3	prostaglandin E synthase 3 (cytosolic)
IPI00300078.6	5	0	5	4	1_0_1_1_	3	9606 - PWP2 Periodic tryptophan protein 2 homolog	PWP2	PWP2 periodic tryptophan protein homolog (yeast)
IPI00549205.1	3	0	3	2	1_0_1_1_	3	9606 - RAD50 Isoform 2 of DNA repair protein RAD50	RAD50	RAD50 homolog (S. cerevisiae)
IPI00792352.1	0	8	11	13	0_1_1_1_	3	9606 - RANP1;RAN 26 kDa protein	RAN	RAN, member RAS oncogene family
IPI00221325.3	14	12	13	7	1_1_1_1_	4	9606 - RANBP2 E3 SUMO-protein ligase RanBP2	RANBP2	RAN binding protein 2
IPI00217661.4	6	0	8	6	1_0_1_1_	3	9606 - RAVER1 RAVER1	RAVER1	ribonucleoprotein, PTB-binding 1
IPI00328319.8	15	12	12	10	1_1_1_1_	4	9606 - RBBP4 Histone-binding protein RBBP4	RBBP4	retinoblastoma binding protein 4
IPI00646512.1	16	9	11	11	1_1_1_1_	4	9606 - RBBP7 cDNA FLJ34592 fis, clone KIDNE2008987, highly similar to Histone-binding protein RBBP7	RBBP7	retinoblastoma binding protein 7
IPI00375731.1	5	0	4	5	1_0_1_1_	3	9606 - RBM10 Putative uncharacterized protein DKFZp686E2459	RBM10	RNA binding motif protein 10
IPI00871240.2	2	2	1	1	1_1_1_1_	4	9606 - RBM16 cDNA FLJ56906, highly similar to RNA-binding protein 16	RBM16	RNA binding motif protein 16
IPI00004273.6	17	0	10	12	1_0_1_1_	3	9606 - RBM25 Isoform 1 of RNA-binding protein 25	RBM25	RNA binding motif protein 25
IPI00304187.8	3	2	4	3	1_1_1_1_	4	9606 - RBM28 RNA-binding protein 28	RBM28	RNA binding motif protein 28
IPI00163505.2	15	10	7	8	1_1_1_1_	4	9606 - RBM39 Isoform 1 of RNA-binding protein 39	RBM39	RNA binding motif protein 39
IPI00021626.2	0	2	2	3	0_1_1_1_	3	9606 - RBM42 Isoform 1 of RNA-binding protein 42	RBM42	RNA binding motif protein 42
IPI00001757.1	2	2	5	2	1_1_1_1_	4	9606 - RBM8A Isoform 1 of RNA-binding protein 8A	RBM8A	RNA binding motif protein 8A
IPI00017367.6	20	7	16	14	1_1_1_1_	4	9606 - RDX Radixin, isoform CRA_a	RDX	radixin
IPI00375358.2	2	0	1	1	1_0_1_1_	3	9606 - RFC1 Isoform 1 of Replication factor C subunit 1	RFC1	replication factor C (activator 1) 1, 145kDa
IPI00031514.1	4	3	2	3	1_1_1_1_	4	9606 - RFC5 Replication factor C subunit 5	RFC5	replication factor C (activator 1) 5, 36.5kDa
IPI00293568.2	6	7	7	5	1_1_1_1_	4	9606 - RGPD6;RGPD5 RanBP2-like and GRIP domain-containing protein 6	RGPD6;RGPD5	RANBP2-like and GRIP domain containing
IPI00245135.1	1	0	2	1	1_0_1_1_	3	9606 - RNASEH2B RNASEH2B protein	RNASEH2B	ribonuclease H2, subunit B
IPI00020127.1	7	12	7	0	1_1_1_0_	3	9606 - RPA1 Replication protein A 70 kDa DNA-binding subunit	RPA1	replication protein A1, 70kDa
IPI00940950.1	0	7	10	8	0_1_1_1_	3	9606 - RPL10 Ribosomal protein L10 (Fragment)	RPL10	ribosomal protein L10
IPI00412579.6	0	5	7	4	0_1_1_1_	3	9606 - RPL10A 60S ribosomal protein L10a	RPL10A	ribosomal protein L10a
IPI00555744.6	6	0	3	5	1_0_1_1_	3	9606 - RPL14 Ribosomal protein L14 variant	RPL14	ribosomal protein L14
IPI00789159.1	3	0	5	4	1_0_1_1_	3	9606 - RPL23A Ribosomal protein L23a, isoform CRA_a	RPL23A	ribosomal protein L23a
IPI00793696.1	7	3	4	4	1_1_1_1_	4	9606 - RPL24 19 kDa protein	RPL24	ribosomal protein L24
IPI00219155.5	10	3	4	5	1_1_1_1_	4	9606 - RPL27 60S ribosomal protein L27	RPL27	ribosomal protein L27
IPI00550021.4	0	9	19	7	0_1_1_1_	3	9606 - RPL3 60S ribosomal protein L3	RPL3	ribosomal protein L3
IPI00927658.1	5	4	6	1	1_1_1_1_	4	9606 - RPL32 Putative uncharacterized protein RPL32	RPL32	ribosomal protein L32
IPI00215790.6	0	1	2	3	0_1_1_1_	3	9606 - RPL38 60S ribosomal protein L38	RPL38	ribosomal protein L38
IPI00790342.1	7	16	11	6	1_1_1_1_	4	9606 - RPL6 60S ribosomal protein L6	RPL6	ribosomal protein L6
IPI00871827.1	9	7	11	8	1_1_1_1_	4	9606 - RPL7P32;RPL7 Putative uncharacterized protein RPL7 (Fragment)	RPL7	ribosomal protein L7
IPI00953028.1	8	0	9	7	1_0_1_1_	3	9606 - RPL7P32;RPL7 Similar to 60S ribosomal protein L7	RPL7	ribosomal protein L7
IPI00008527.3	3	1	4	2	1_1_1_1_	4	9606 - RPLP1 60S acidic ribosomal protein P1	RPLP1	ribosomal protein, large, P1
IPI00028635.5	5	0	5	2	1_0_1_1_	3	9606 - RPN2 Dolichyl-diphosphooligosaccharide--protein glycosyltransferase subunit 2	RPN2	ribophorin II
IPI00215966.3	1	0	1	1	1_0_1_1_	3	9606 - RPP14 Ribonuclease P protein subunit p14	RPP14	ribonuclease P/MRP 14kDa subunit
IPI00915363.1	5	3	5	1	1_1_1_1_	4	9606 - RPS24 ribosomal protein S24 isoform d	RPS24	ribosomal protein S24
IPI00179330.6	7	8	8	0	1_1_1_0_	3	9606 - RPS27A;UBB;UBC ubiquitin and ribosomal protein S27a precursor	RPS27A;UBB;UBC	ubiquitin and ribosomal protein S27a precursor
IPI00008433.4	0	3	9	6	0_1_1_1_	3	9606 - RPS5 40S ribosomal protein S5	RPS5	ribosomal protein S5
IPI00021840.1	8	5	7	0	1_1_1_0_	3	9606 - RPS6 40S ribosomal protein S6	RPS6	ribosomal protein S6
IPI00477982.1	2	3	4	0	1_1_1_0_	3	9606 - RPS6KA1 ribosomal protein S6 kinase, 90kDa, polypeptide 1 isoform b	RPS6KA1	ribosomal protein S6 kinase, 90kDa, polypeptide 1
IPI00413108.4	11	9	13	7	1_1_1_1_	4	9606 - RPSA;RPSAP15 33 kDa protein	RPSA	ribosomal protein SA
IPI00101186.6	8	0	8	5	1_0_1_1_	3	9606 - RRP12 Isoform 1 of RRP12-like protein	RRP12	ribosomal RNA processing 12 homolog (S. cerevisiae)
IPI00290952.6	1	0	1	1	1_0_1_1_	3	9606 - RRP1B Isoform 1 of Ribosomal RNA processing protein 1 homolog B	RRP1B	ribosomal RNA processing 1 homolog B (S. cerevisiae)
IPI00217862.5	4	0	2	2	1_0_1_1_	3	9606 - RRP9 U3 small nucleolar RNA-interacting protein 2	RRP9	ribosomal RNA processing 9, small subunit (SSU) processome component, homolog (yeast)
IPI00014253.4	3	4	4	2	1_1_1_1_	4	9606 - RRS1 Ribosome biogenesis regulatory protein homolog	RRS1	RRS1 ribosome biogenesis regulator homolog (S. cerevisiae)
IPI00847168.3	6	5	0	5	1_1_0_1_	3	9606 - RSU1 RSU1 protein (Fragment)	RSU1	Ras suppressor protein 1
IPI00743293.2	1	1	1	0	1_1_1_0_	3	9606 - RTN3 Isoform 1 of Reticulon-3	RTN3	reticulon 3
IPI00946478.1	2	1	1	0	1_1_1_0_	3	9606 - RYBP Protein	RYBP	RING1 and YY1 binding protein
IPI00011698.4	5	5	5	3	1_1_1_1_	4	9606 - SAP18 Sin3A-associated protein, 18kDa	SAP18	Sin3A-associated protein, 18kDa
IPI00022019.1	3	0	1	1	1_0_1_1_	3	9606 - SAP30 Histone deacetylase complex subunit SAP30	SAP30	Sin3A-associated protein, 30kDa
IPI00021417.3	11	0	5	7	1_0_1_1_	3	9606 - SART1 U4/U6.U5 tri-snRNP-associated protein 1	SART1	squamous cell carcinoma antigen recognized by T cells
IPI00023649.3	1	0	2	1	1_0_1_1_	3	9606 - SBNO1 Isoform 1 of Protein strawberry notch homolog 1	SBNO1	strawberry notch homolog 1 (Drosophila)
IPI00018240.8	6	2	3	5	1_1_1_1_	4	9606 - SDAD1 Isoform 1 of Protein SDA1 homolog	SDAD1	SDA1 domain containing 1
IPI00218466.7	3	4	5	1	1_1_1_1_	4	9606 - SEC61A1 cDNA FLJ59739, highly similar to Protein transport protein Sec61 subunit alpha isoform 1	SEC61A1	Sec61 alpha 1 subunit (S. cerevisiae)
IPI00220609.3	0	9	8	5	0_1_1_1_	3	9606 - SEH1L Isoform B of Nucleoporin SEH1	SEH1L	SEH1-like (S. cerevisiae)
IPI00019376.7	17	12	0	8	1_1_0_1_	3	9606 - SEPT11 Isoform 2 of Septin-11	SEPT11	septin 11
IPI00871851.2	21	19	13	14	1_1_1_1_	4	9606 - SEPT2 Isoform 2 of Septin-2	SEPT2	septin 2
IPI00550119.7	10	12	6	8	1_1_1_1_	4	9606 - SEPT6 cDNA FLJ58821, highly similar to Septin-6	SEPT6	septin 6
IPI00941534.1	0	13	13	18	0_1_1_1_	3	9606 - SEPT7 Isoform 1 of Septin-7	SEPT7	septin 7
IPI00784614.1	23	15	12	10	1_1_1_1_	4	9606 - SEPT9 septin 9 isoform a	SEPT9	septin 9
IPI00300371.5	34	18	18	0	1_1_1_0_	3	9606 - SF3B3 Isoform 1 of Splicing factor 3B subunit 3	SF3B3	splicing factor 3b, subunit 3, 130kDa
IPI00647217.2	8	8	6	7	1_1_1_1_	4	9606 - SKIV2L2 Superkiller viralicidic activity 2-like 2	SKIV2L2	superkiller viralicidic activity 2-like 2 (S. cerevisiae)
IPI00301364.3	0	2	2	4	0_1_1_1_	3	9606 - SKP1 Isoform 1 of S-phase kinase-associated protein 1	SKP1	S-phase kinase-associated protein 1
IPI00792743.1	1	2	3	1	1_1_1_1_	4	9606 - SLTM SAFB-like transcription modulator	SLTM	SAFB-like, transcription modulator
IPI00062599.3	7	5	3	4	1_1_1_1_	4	9606 - SMARCD1	SMARCD1	SWI/SNF related, matrix associated, actin dependent regulator of chromatin, subfamily d, member 1
IPI00848321.1	9	4	0	1	1_1_0_1_	3	9606 - SMARCD2 SWI/SNF-related matrix-associated actin-dependent regulator of chromatin d2 isoform 1	SMARCD2	SWI/SNF related, matrix associated, actin dependent regulator of chromatin, subfamily d, member 2
IPI00291939.1	22	28	21	20	1_1_1_1_	4	9606 - SMC1A Structural maintenance of chromosomes protein 1A	SMC1A	structural maintenance of chromosomes 1A
IPI00219420.3	24	26	23	0	1_1_1_0_	3	9606 - SMC3 Structural maintenance of chromosomes protein 3	SMC3	structural maintenance of chromosomes 3
IPI00411559.2	8	6	0	4	1_1_0_1_	3	9606 - SMC4 Isoform 1 of Structural maintenance of chromosomes protein 4	SMC4	structural maintenance of chromosomes 4
IPI00890837.1	15	9	7	4	1_1_1_1_	4	9606 - SMCHD1 Isoform 1 of Structural maintenance of chromosomes flexible hinge domain-containing protein 1	SMCHD1	structural maintenance of chromosomes flexible hinge domain containing 1
IPI00305833.3	4	3	4	6	1_1_1_1_	4	9606 - SMU1 WD40 repeat-containing protein SMU1	SMU1	smu-1 suppressor of mec-8 and unc-52 homolog (C. elegans)
IPI00006723.5	0	3	5	6	0_1_1_1_	3	9606 - SNRNP40 cDNA FLJ56825, highly similar to WD repeat protein 57	SNRNP40	small nuclear ribonucleoprotein 40kDa (U5)
IPI00329512.3	5	2	6	5	1_1_1_1_	4	9606 - SNRPB Isoform SM-B1 of Small nuclear ribonucleoprotein-associated proteins B and B'	SNRPB	small nuclear ribonucleoprotein polypeptides B and B1
IPI00879750.1	3	5	4	3	1_1_1_1_	4	9606 - SNRPD3 Putative uncharacterized protein SNRPD3	SNRPD3	small nuclear ribonucleoprotein D3 polypeptide 18kDa
IPI00299095.2	2	2	4	0	1_1_1_0_	3	9606 - SNX2 Sorting nexin-2	SNX2	sorting nexin 2
IPI00298111.7	0	1	2	1	0_1_1_1_	3	9606 - SNX6 sorting nexin 6 isoform b	SNX6	sorting nexin 6
IPI00005614.6	0	5	3	4	0_1_1_1_	3	9606 - SPTBN1 Isoform Long of Spectrin beta chain, brain 1	SPTBN1	spectrin, beta, non-erythrocytic 1
IPI00375462.1	3	2	1	3	1_1_1_1_	4	9606 - SREK1 Isoform 2 of Splicing factor, arginine/serine-rich 12	SREK1	splicing regulatory glutamine/lysine-rich protein 1
IPI00385267.4	4	0	2	2	1_0_1_1_	3	9606 - SRPR Signal recognition particle receptor subunit alpha	SRPR	signal recognition particle receptor (docking protein)
IPI00295098.3	3	4	4	2	1_1_1_1_	4	9606 - SRPRB Signal recognition particle receptor subunit beta	SRPRB	signal recognition particle receptor, B subunit
IPI00946150.1	1	1	0	1	1_1_0_1_	3	9606 - SSR3 cDNA FLJ52061, highly similar to Translocon-associated protein subunit gamma	SSR3	signal sequence receptor, gamma (translocon-associated protein gamma)
IPI00019385.3	1	2	2	0	1_1_1_0_	3	9606 - SSR4 Translocon-associated protein subunit delta precursor	SSR4	signal sequence receptor, delta (translocon-associated protein delta)
IPI00304742.5	2	0	1	2	1_0_1_1_	3	9606 - STK10 Serine/threonine-protein kinase 10	STK10	serine/threonine kinase 10
IPI00294536.2	0	5	8	2	0_1_1_1_	3	9606 - STRAP cDNA FLJ51909, highly similar to Serine-threonine kinase receptor-associatedprotein	STRAP	serine/threonine kinase receptor associated protein
IPI00152377.1	2	0	3	2	1_0_1_1_	3	9606 - STT3B Dolichyl-diphosphooligosaccharide--protein glycosyltransferase subunit STT3B	STT3B	STT3, subunit of the oligosaccharyltransferase complex, homolog B (S. cerevisiae)
IPI00412404.1	1	0	1	1	1_0_1_1_	3	9606 - SUPV3L1 ATP-dependent RNA helicase SUPV3L1, mitochondrial	SUPV3L1	suppressor of var1, 3-like 1 (S. cerevisiae)
IPI00018140.3	10	11	14	0	1_1_1_0_	3	9606 - SYNCRIP Isoform 1 of Heterogeneous nuclear ribonucleoprotein Q	SYNCRIP	synaptotagmin binding, cytoplasmic RNA interacting protein
IPI00645793.3	1	0	2	3	1_0_1_1_	3	9606 - TAF1 Isoform 4 of Transcription initiation factor TFIID subunit 1	TAF1	TAF1 RNA polymerase II, TATA box binding protein (TBP)-associated factor, 250kDa
IPI00944951.1	6	2	0	2	1_1_0_1_	3	9606 - TAF6 79 kDa protein	TAF6	TAF6 RNA polymerase II, TATA box binding protein (TBP)-associated factor, 80kDa
IPI00477971.4	6	3	1	6	1_1_1_1_	4	9606 - TBL3 Transducin beta-like protein 3	TBL3	transducin (beta)-like 3
IPI00410162.1	3	1	0	1	1_1_0_1_	3	9606 - TCEB2 elongin B isoform b	TCEB2	transcription elongation factor B (SIII), polypeptide 2 (18kDa, elongin B)
IPI00290566.1	8	17	17	9	1_1_1_1_	4	9606 - TCP1 T-complex protein 1 subunit alpha	TCP1	t-complex 1
IPI00100656.3	3	3	0	2	1_1_0_1_	3	9606 - TECR Isoform 1 of Trans-2,3-enoyl-CoA reductase	TECR	trans-2,3-enoyl-CoA reductase
IPI00022463.1	7	6	10	2	1_1_1_1_	4	9606 - TF Serotransferrin	TF	transferrin
IPI00063729.4	0	3	5	3	0_1_1_1_	3	9606 - THOC3 THO complex subunit 3	THOC3	THO complex 3
IPI00954568.1	0	2	2	1	0_1_1_1_	3	9606 - TIMM17B translocase of inner mitochondrial membrane 17 homolog B isoform 1	TIMM17B	translocase of inner mitochondrial membrane 17 homolog B (yeast)
IPI00643920.3	0	7	9	8	0_1_1_1_	3	9606 - TKT cDNA FLJ54957, highly similar to Transketolase	TKT	transketolase
IPI00045764.3	8	1	3	5	1_1_1_1_	4	9606 - TMEM209 Isoform 1 of Transmembrane protein 209	TMEM209	transmembrane protein 209
IPI00386760.2	2	1	0	1	1_1_0_1_	3	9606 - TMEM48 Isoform 1 of Nucleoporin NDC1	TMEM48	transmembrane protein 48
IPI00009946.4	4	3	5	0	1_1_1_0_	3	9606 - TOMM34 Mitochondrial import receptor subunit TOM34	TOMM34	translocase of outer mitochondrial membrane 34
IPI00879004.1	80	56	62	51	1_1_1_1_	4	9606 - TOP2A Isoform 4 of DNA topoisomerase 2-alpha	TOP2A	topoisomerase (DNA) II alpha 170kDa
IPI00027280.2	45	33	31	0	1_1_1_0_	3	9606 - TOP2B Isoform Beta-2 of DNA topoisomerase 2-beta	TOP2B	topoisomerase (DNA) II beta 180kDa
IPI00023137.1	1	0	1	1	1_0_1_1_	3	9606 - TOR1B Torsin-1B	TOR1B	torsin family 1, member B (torsin B)
IPI00742682.2	34	27	17	35	1_1_1_1_	4	9606 - TPR Nucleoprotein TPR	TPR	translocated promoter region (to activated MET oncogene)
IPI00555647.4	3	3	2	3	1_1_1_1_	4	9606 - TRA2B Splicing factor, arginine/serine-rich 10 (Transformer 2 homolog, Drosophila) variant	TRA2B	transformer 2 beta homolog (Drosophila)
IPI00438229.2	17	15	0	9	1_1_0_1_	3	9606 - TRIM28 Isoform 1 of Transcription intermediary factor 1-beta	TRIM28	tripartite motif-containing 28
IPI00032342.4	0	9	4	6	0_1_1_1_	3	9606 - TRIP12 TRIP12 protein	TRIP12	thyroid hormone receptor interactor 12
IPI00180675.4	51	33	0	30	1_1_0_1_	3	9606 - TUBA1A Tubulin alpha-1A chain	TUBA1A	tubulin, alpha 1a
IPI00218343.4	49	31	34	0	1_1_1_0_	3	9606 - TUBA1C Tubulin alpha-1C chain	TUBA1C	tubulin, alpha 1c
IPI00645452.1	62	38	37	36	1_1_1_1_	4	9606 - TUBB Tubulin, beta	TUBB	tubulin, beta
IPI00926685.1	35	18	22	0	1_1_1_0_	3	9606 - TUBB4 cDNA FLJ53341, highly similar to Tubulin beta-4 chain	TUBB4	tubulin, beta 4
IPI00646779.2	45	0	28	24	1_0_1_1_	3	9606 - TUBB6 TUBB6 protein	TUBB6	tubulin, beta 6
IPI00642032.1	1	0	1	1	1_0_1_1_	3	9606 - TXNL1 cDNA, FLJ94230, highly similar to Homo sapiens thioredoxin-like 1 (TXNL1), mRNA	TXNL1	thioredoxin-like 1
IPI00909773.1	2	1	3	1	1_1_1_1_	4	9606 - UBE2L3 Ubiquitin carrier protein	UBE2L3	ubiquitin-conjugating enzyme E2L 3
IPI00024502.2	1	2	0	2	1_1_0_1_	3	9606 - UBQLN4 Ubiquilin-4	UBQLN4	ubiquilin 4
IPI00642374.1	3	2	2	0	1_1_1_0_	3	9606 - UCHL5 Ubiquitin carboxyl-terminal hydrolase L5	UCHL5	ubiquitin carboxyl-terminal hydrolase L5
IPI00927646.1	2	0	2	2	1_0_1_1_	3	9606 - USP19 Ubiquitin carboxyl-terminal hydrolase	USP19	ubiquitin specific peptidase 19
IPI00929268.1	22	4	11	8	1_1_1_1_	4	9606 - UTP20 down-regulated in metastasis	UTP20	UTP20, small subunit (SSU) processome component, homolog (yeast)
IPI00410544.4	1	0	1	1	1_0_1_1_	3	9606 - UXS1 Isoform 2 of UDP-glucuronic acid decarboxylase 1	UXS1	UDP-glucuronate decarboxylase 1
IPI00156689.3	1	3	5	0	1_1_1_0_	3	9606 - VAT1 Synaptic vesicle membrane protein VAT-1 homolog	VAT1	vesicle amine transport protein 1 homolog (T. californica)
IPI00307162.2	2	0	6	1	1_0_1_1_	3	9606 - VCL Isoform 2 of Vinculin	VCL	vinculin
IPI00298971.1	1	2	3	0	1_1_1_0_	3	9606 - VTN Vitronectin	VTN	vitronectin
IPI00169325.1	13	7	0	4	1_1_0_1_	3	9606 - WDR36 WD repeat-containing protein 36	WDR36	WD repeat domain 36
IPI00641707.2	1	1	1	1	1_1_1_1_	4	9606 - WDR45 cDNA FLJ57916, highly similar to WD repeat domain phosphoinositide-interacting protein 4	WDR45	WD repeat domain 45
IPI00018192.2	1	0	2	2	1_0_1_1_	3	9606 - WDR74 Isoform 1 of WD repeat-containing protein 74	WDR74	WD repeat domain 74
IPI00394679.3	2	1	0	1	1_1_0_1_	3	9606 - WHSC2 Wolf-Hirschhorn syndrome candidate 2 protein	WHSC2	Wolf-Hirschhorn syndrome candidate 2
IPI00643351.1	1	0	2	1	1_0_1_1_	3	9606 - YBX1 Protein	YBX1	Y box binding protein 1
IPI00165434.4	4	3	3	1	1_1_1_1_	4	9606 - YLPM1 YLP motif containing 1	YLPM1	YLP motif containing 1
IPI00097492.4	2	2	0	2	1_1_0_1_	3	9606 - ZNF512 Zinc finger protein 512	ZNF512	zinc finger protein 512
