# Supplementary material for: Mitotic Spindle Proteomics in Chinese Hamster Ovary Cells
Source: PLoS One. 2011 May 27;6(5):e20489. doi: 10.1371/journal.pone.0020489 (PMC3103581; doi:10.1371/journal.pone.0020489)
Supplement: Table S2 — Non-redundant data for the metaphase spindle proteome and corresponding GO terms. In this table, species differences are not included as separate entries, isoforms are not included as separate entries, and pseudogenes are not included. In column A, semicolons separate indistinguishable proteins. HGNC approved names are reported in column B. Cellular Component GO terms are found in column C. GO terms were manually annotated and validated for proteins in membrane, microtubule, actin, and unknown categories. Details are described in the Methods. Manually annotated proteins published as involved with cell division or cancer are marked in column D. (XLSX) [file pone.0020489.s002.xlsx]

## Sheet: Supporting Table S2
Bonner et al.
GO term data for CHO Metaphase Mitotic Spindle Proteome
Total Number=1155 Non-Redundant Proteins
Supporting Information: Table S2
Supporting Table S2 contains the non-redundant data for the metaphase spindle proteome and corresponding GO terms.
In column A, semicolons separate indistinguishable proteins. HGNC approved names are reported in column B (12/2010).
Cellular Component GO terms are found in column C. GO terms were manually annotated and validated for proteins
in membrane, microtubule, actin and unknown categories. Details are described in the Methods. Manually annotated
proteins published as involved with cell division or cancer are marked in column D.
Protein	Protein Description	Cellular Component (GO)	Cell Division?
ACTL6A	actin-like 6A	actin cytoskeleton
ACTN1	actinin, alpha 1	actin cytoskeleton
ACTR2	ARP2 actin-related protein 2 homolog (yeast)	actin cytoskeleton
ARPC2	actin related protein 2/3 complex, subunit 2, 34kDa	actin cytoskeleton
CAP1	CAP, adenylate cyclase-associated protein 1 (yeast)	actin cytoskeleton
CCT3	chaperonin containing TCP1, subunit 3 (gamma)	actin cytoskeleton
CDC42	cell division cycle 42 (GTP binding protein, 25kDa)	actin cytoskeleton
CFL1	cofilin 1 (non-muscle)	actin cytoskeleton
CORO1C	coronin, actin binding protein, 1C	actin cytoskeleton
DBN1	drebrin 1	actin cytoskeleton
DIAPH1	diaphanous homolog 1 (Drosophila)	actin cytoskeleton
FERMT2	fermitin family member 2	actin cytoskeleton
FLNA	filamin A, alpha	actin cytoskeleton
FLNB	filamin B, beta	actin cytoskeleton
FNBP4	formin binding protein 4	actin cytoskeleton
GSN	gelsolin	actin cytoskeleton
INF2	inverted formin, FH2 and WH2 domain containing	actin cytoskeleton
IQGAP2	IQ motif containing GTPase activating protein 2	actin cytoskeleton
MYL12A	myosin, light chain 12A, regulatory, non-sarcomeric	actin cytoskeleton
MYL6	myosin, light chain 6, alkali, smooth muscle and non-muscle	actin cytoskeleton
PDLIM5	PDZ and LIM domain 5	actin cytoskeleton
RAI14	retinoic acid induced 14	actin cytoskeleton
RAVER1	ribonucleoprotein, PTB-binding 1	actin cytoskeleton
SEPT11	septin 11	actin cytoskeleton
SPTBN1	spectrin, beta, non-erythrocytic 1	actin cytoskeleton
VCL	vinculin	actin cytoskeleton
ANLN	anillin, actin binding protein	actin cytoskeleton, cancer	x
PTP4A1	protein tyrosine phosphatase type IVA, member 1	actin cytoskeleton, cancer	x
ACTR3	ARP3 actin-related protein 3 homolog (yeast)	actin cytoskeleton, cell cycle	x
MYH9	myosin, heavy chain 9, non-muscle	actin cytoskeleton, cell cycle	x
PFN1	profilin 1	actin cytoskeleton, cell cycle	x
IQGAP1	IQ motif containing GTPase activating protein 1	actin cytoskeleton, cell prolif	x
SEPT2	septin 2	actin cytoskeleton, cytokinesis	x
MYO1C	myosin IC	actin cytoskeleton, membrane
MYO1E	myosin IE	actin cytoskeleton, membrane
TLN1	talin 1	actin cytoskeleton, membrane
TRIP10	thyroid hormone receptor interactor 10	actin cytoskeleton, membrane
EZR	ezrin	actin cytoskeleton, membrane, cancer	x
MSN	moesin	actin cytoskeleton, membrane, spindle
AURKC	aurora kinase C	centromeres, cytokinesis	x
MCM5	minichromosome maintenance complex component 5	centrosomes, cancer	x
CUL1	cullin 1	centrosomes, cell cycle	x
GNB2L1	guanine nucleotide binding protein (G protein), beta polypeptide 2-like 1	centrosomes, cell cycle	x
AARS	alanyl-tRNA synthetase	cytoplasm
ACAA1	acetyl-CoA acyltransferase 1	cytoplasm
ACOT7	acyl-CoA thioesterase 7	cytoplasm
ACTBL2	actin, beta-like 2	cytoplasm
ADNP	activity-dependent neuroprotector homeobox	cytoplasm
ADSS	adenylosuccinate synthase	cytoplasm
C17orf81	chromosome 17 open reading frame 81	cytoplasm
C22orf28	chromosome 22 open reading frame 28	cytoplasm
CARS	cysteinyl-tRNA synthetase	cytoplasm
CCT4	chaperonin containing TCP1, subunit 4 (delta)	cytoplasm
CCT6A	chaperonin containing TCP1, subunit 6A (zeta 1)	cytoplasm
CDC37	cell division cycle 37 homolog (S. cerevisiae)	cytoplasm
CHERP	calcium homeostasis endoplasmic reticulum protein	cytoplasm
CUL4A	cullin 4A	cytoplasm
DARS	aspartyl-tRNA synthetase	cytoplasm
DDX6	DEAD (Asp-Glu-Ala-Asp) box polypeptide 6	cytoplasm
DNAJA1	DnaJ (Hsp40) homolog, subfamily A, member 1	cytoplasm
DNAJC3	DnaJ (Hsp40) homolog, subfamily C, member 3	cytoplasm
EEF1A1	eukaryotic translation elongation factor 1 alpha 1	cytoplasm
EEF1B2	eukaryotic translation elongation factor 1 beta 2	cytoplasm
EEF1D	eukaryotic translation elongation factor 1 delta (guanine nucleotide exchange protein)	cytoplasm
EEF1G	eukaryotic translation elongation factor 1 gamma	cytoplasm
EEF1G;TUT1	eukaryotic translation elongation factor 1 gamma	cytoplasm
EEF2	eukaryotic translation elongation factor 2	cytoplasm
EIF2S2	eukaryotic translation initiation factor 2, subunit 2 beta, 38kDa	cytoplasm
EIF3D	eukaryotic translation initiation factor 3, subunit D	cytoplasm
EIF3F	eukaryotic translation initiation factor 3, subunit F	cytoplasm
EIF3M	eukaryotic translation initiation factor 3, subunit M	cytoplasm
EIF4G1	eukaryotic translation initiation factor 4 gamma, 1	cytoplasm
EIF5	eukaryotic translation initiation factor 5	cytoplasm
EIF5B	eukaryotic translation initiation factor 5B	cytoplasm
ENO1	enolase 1, (alpha)	cytoplasm
EPRS	glutamyl-prolyl-tRNA synthetase	cytoplasm
ETF1	eukaryotic translation termination factor 1	cytoplasm
FAM129B	family with sequence similarity 129, member B	cytoplasm
FARSB	phenylalanyl-tRNA synthetase, beta subunit	cytoplasm
GALK1	galactokinase 1	cytoplasm
GAPDH	glyceraldehyde-3-phosphate dehydrogenase	cytoplasm
GART	phosphoribosylglycinamide formyltransferase, phosphoribosylglycinamide synthetase, phosphoribosylaminoimidazole synthetase	cytoplasm
GLRX3	glutaredoxin 3	cytoplasm
GLT25D1	glycosyltransferase 25 domain containing 1	cytoplasm
GMPS	guanine monphosphate synthetase	cytoplasm
GNB2	guanine nucleotide binding protein (G protein), beta polypeptide 2	cytoplasm
GSPT1	G1 to S phase transition 1	cytoplasm
GSTM5	glutathione S-transferase mu 5	cytoplasm
GTPBP1	GTP binding protein 1	cytoplasm
HACL1	2-hydroxyacyl-CoA lyase 1	cytoplasm
Hars2l		cytoplasm
HNRNPA0	heterogeneous nuclear ribonucleoprotein A0	cytoplasm
HSPA14	heat shock 70kDa protein 14	cytoplasm
HYOU1	hypoxia up-regulated 1	cytoplasm
IARS	isoleucyl-tRNA synthetase	cytoplasm
IMPDH2	IMP (inosine 5'-monophosphate) dehydrogenase 2	cytoplasm
KRT2	keratin 2	cytoplasm
KRT9	keratin 9	cytoplasm
LOC300303		cytoplasm
LYPLA2	lysophospholipase II	cytoplasm
MAGOHB	mago-nashi homolog B (Drosophila)	cytoplasm
MCTS1	malignant T cell amplified sequence 1	cytoplasm
MOCS3	molybdenum cofactor synthesis 3	cytoplasm
MTAP	methylthioadenosine phosphorylase	cytoplasm
NAA25	N(alpha)-acetyltransferase 25, NatB auxiliary subunit	cytoplasm
NAA50	N(alpha)-acetyltransferase 50, NatE catalytic subunit	cytoplasm
NEDD4	neural precursor cell expressed, developmentally down-regulated 4	cytoplasm
NEK7	NIMA (never in mitosis gene a)-related kinase 7	cytoplasm
NMT1	N-myristoyltransferase 1	cytoplasm
NSF	N-ethylmaleimide-sensitive factor	cytoplasm
NT5C2	5'-nucleotidase, cytosolic II	cytoplasm
OLA1	Obg-like ATPase 1	cytoplasm
PGK1	phosphoglycerate kinase 1	cytoplasm
PHGDH	phosphoglycerate dehydrogenase	cytoplasm
PLEC	plectin	cytoplasm
PPP2R1A	protein phosphatase 2, regulatory subunit A, alpha	cytoplasm
PPP6R1	protein phosphatase 6, regulatory subunit 1	cytoplasm
PRDX2	peroxiredoxin 2	cytoplasm
QKI	quaking homolog, KH domain RNA binding (mouse)	cytoplasm
RGD1564688		cytoplasm
RSU1	Ras suppressor protein 1	cytoplasm
SERPINH1	serpin peptidase inhibitor, clade H (heat shock protein 47), member 1, (collagen binding protein 1)	cytoplasm
SRP72	signal recognition particle 72kDa	cytoplasm
SRPRB	signal recognition particle receptor, B subunit	cytoplasm
ST13	suppression of tumorigenicity 13 (colon carcinoma) (Hsp70 interacting protein)	cytoplasm
TARS	threonyl-tRNA synthetase	cytoplasm
TK1	thymidine kinase 1, soluble	cytoplasm
TXNL1	thioredoxin-like 1	cytoplasm
UBA1	ubiquitin-like modifier activating enzyme 1	cytoplasm
UBE2L3	ubiquitin-conjugating enzyme E2L 3	cytoplasm
UGDH	UDP-glucose 6-dehydrogenase	cytoplasm
UPF1	UPF1 regulator of nonsense transcripts homolog (yeast)	cytoplasm
USP19	ubiquitin specific peptidase 19	cytoplasm
UXS1	UDP-glucuronate decarboxylase 1	cytoplasm
CPNE3	copine III	cytoplasm, cancer	x
CDC5L	CDC5 cell division cycle 5-like (S. pombe)	cytoplasm, cell cycle	x
CAPRIN1	cell cycle associated protein 1	cytoplasm, cell prolif	x
PPP1CC	protein phosphatase 1, catalytic subunit, gamma isozyme	cytoplasm, mitosis	x
KRT1	keratin 1	cytoskeleton
KRT16	keratin 16	cytoskeleton (IF)
RTN3	reticulon 3	endomembrane system
HSD17B12	hydroxysteroid (17-beta) dehydrogenase 12	ER
NOMO1	NODAL modulator 1	ER
PDIA3	protein disulfide isomerase family A, member 3	ER
SPCS3	signal peptidase complex subunit 3 homolog (S. cerevisiae)	ER
CANX	calnexin	ER membrane
RRBP1	ribosome binding protein 1 homolog 180kDa (dog)	ER membrane
SCD	stearoyl-CoA desaturase (delta-9-desaturase)	ER membrane
SEC22B	SEC22 vesicle trafficking protein homolog B (S. cerevisiae) (gene/pseudogene)	ER membrane
SRPR	signal recognition particle receptor (docking protein)	ER membrane
SSR4	signal sequence receptor, delta (translocon-associated protein delta)	ER membrane
STT3B	STT3, subunit of the oligosaccharyltransferase complex, homolog B (S. cerevisiae)	ER membrane
LPL	lipoprotein lipase	ER, golgi
CTSB	cathepsin B	ER, vesicle
AHSG	alpha-2-HS-glycoprotein	extracellular region
C3	complement component 3	extracellular region
C4-2		extracellular region
FBLN1	fibulin 1	extracellular region
FGG	fibrinogen gamma chain	extracellular region
FN1	fibronectin 1	extracellular region
GALNT2	UDP-N-acetyl-alpha-D-galactosamine:polypeptide N-acetylgalactosaminyltransferase 2 (GalNAc-T2)	extracellular region
HABP2	hyaluronan binding protein 2	extracellular region
HSPG2	heparan sulfate proteoglycan 2	extracellular region
LAMA5	laminin, alpha 5	extracellular region
LGALS1	lectin, galactoside-binding, soluble, 1	extracellular region
PLG	plasminogen	extracellular region
PRSS1	protease, serine, 1 (trypsin 1)	extracellular region
SERPINF1	serpin peptidase inhibitor, clade F (alpha-2 antiplasmin, pigment epithelium derived factor), member 1	extracellular region
VTN	vitronectin	extracellular region
INS;INS-IGF2	insulin	extracellular region, cancer	x
HBE1	hemoglobin, epsilon 1	intermediate filament
CCNB1	cyclin B1	kinetochore
CLASP1	cytoplasmic linker associated protein 1	kinetochore
NUP107	nucleoporin 107kDa	kinetochore
NUP133	nucleoporin 133kDa	kinetochore
NUP37	nucleoporin 37kDa	kinetochore
SEC13	SEC13 homolog (S. cerevisiae)	kinetochore
TPR	translocated promoter region (to activated MET oncogene)	kinetochore
BUB3	budding uninhibited by benzimidazoles 3 homolog (yeast)	kinetochore, cell cycle	x
PLK1	polo-like kinase 1	kinetochore, cell cycle	x
SEH1L	SEH1-like (S. cerevisiae)	kinetochore, cell cycle	x
NUP160	nucleoporin 160kDa	kinetochore, cytokinesis	x
NUP43	nucleoporin 43kDa	kinetochore, cytokinesis	x
AHCTF1	AT hook containing transcription factor 1	kinetochore, mitosis	x
MAD1L1	MAD1 mitotic arrest deficient-like 1 (yeast)	kinetochore, mitosis	x
NUP85	nucleoporin 85kDa	kinetochore, mitosis	x
INCENP	inner centromere protein antigens 135/155kDa	kinetochore, spindle
ABCD3	ATP-binding cassette, sub-family D (ALD), member 3	membrane
ABHD12	abhydrolase domain containing 12	membrane
ALG5	asparagine-linked glycosylation 5, dolichyl-phosphate beta-glucosyltransferase homolog (S. cerevisiae)	membrane
ANXA1	annexin A1	membrane
ANXA2	annexin A2	membrane
ANXA5	annexin A5	membrane
AP1B1	adaptor-related protein complex 1, beta 1 subunit	membrane
AP2A1	adaptor-related protein complex 2, alpha 1 subunit	membrane
AP2B1	adaptor-related protein complex 2, beta 1 subunit	membrane
AP2M1	adaptor-related protein complex 2, mu 1 subunit	membrane
AP3D1	adaptor-related protein complex 3, delta 1 subunit	membrane
AP3M1	adaptor-related protein complex 3, mu 1 subunit	membrane
ARF6	ADP-ribosylation factor 6	membrane
ARHGAP1	Rho GTPase activating protein 1	membrane
ARL1	ADP-ribosylation factor-like 1	membrane
ATP1A1	ATPase, Na+/K+ transporting, alpha 1 polypeptide	membrane
BUD31	BUD31 homolog (S. cerevisiae)	membrane
CCDC47	coiled-coil domain containing 47	membrane
CLTC	clathrin, heavy chain (Hc)	membrane	x
COPB1	coatomer protein complex, subunit beta 1	membrane
COPB2	coatomer protein complex, subunit beta 2 (beta prime)	membrane
COPG2	coatomer protein complex, subunit gamma 2	membrane
CYB5R1	cytochrome b5 reductase 1	membrane
DDOST	dolichyl-diphosphooligosaccharide--protein glycosyltransferase	membrane
DNAJC13	DnaJ (Hsp40) homolog, subfamily C, member 13	membrane
DNM1L	dynamin 1-like	membrane
DOCK5	dedicator of cytokinesis 5	membrane
EHD1	EH-domain containing 1	membrane
EHD4	EH-domain containing 4	membrane
EIF3H	eukaryotic translation initiation factor 3, subunit H	membrane
ERLIN2	ER lipid raft associated 2	membrane
ESYT1	extended synaptotagmin-like protein 1	membrane
EXOC1	exocyst complex component 1	membrane
FKBP11	FK506 binding protein 11, 19 kDa	membrane
GAPVD1	GTPase activating protein and VPS9 domains 1	membrane
GDI2	GDP dissociation inhibitor 2	membrane
GNB1	guanine nucleotide binding protein (G protein), beta polypeptide 1	membrane
GPC1	glypican 1	membrane
GRK6	G protein-coupled receptor kinase 6	membrane
HPX	hemopexin	membrane
KCNAB2	potassium voltage-gated channel, shaker-related subfamily, beta member 2	membrane
KIAA0090	KIAA0090	membrane
KIFC1	kinesin family member C1	membrane
LGTN	ligatin	membrane
LRRC59	leucine rich repeat containing 59	membrane
MGST3	microsomal glutathione S-transferase 3	membrane
MYOF	myoferlin	membrane
NCKAP1	NCK-associated protein 1	membrane
PARVB	parvin, beta	membrane
PDCD6	programmed cell death 6	membrane
PDCD6IP	programmed cell death 6 interacting protein	membrane
PIGU	phosphatidylinositol glycan anchor biosynthesis, class U	membrane
PXK	PX domain containing serine/threonine kinase	membrane
RAB14	RAB14, member RAS oncogene family	membrane
RAB1A	RAB1A, member RAS oncogene family	membrane
RAB1B	RAB1B, member RAS oncogene family	membrane
RAB31	RAB31, member RAS oncogene family	membrane
RAB8A	RAB8A, member RAS oncogene family	membrane
S100A10	S100 calcium binding protein A10	membrane
SCYL2	SCY1-like 2 (S. cerevisiae)	membrane
SEC23A	Sec23 homolog A (S. cerevisiae)	membrane
SEC23B	Sec23 homolog B (S. cerevisiae)	membrane
SEC31A	SEC31 homolog A (S. cerevisiae)	membrane
SEC61A1	Sec61 alpha 1 subunit (S. cerevisiae)	membrane
SH3PXD2A	SH3 and PX domains 2A	membrane
SH3PXD2B	SH3 and PX domains 2B	membrane
SMPD4	sphingomyelin phosphodiesterase 4, neutral membrane (neutral sphingomyelinase-3)	membrane
SNX2	sorting nexin 2	membrane
SNX6	sorting nexin 6	membrane
SPCS2	signal peptidase complex subunit 2 homolog (S. cerevisiae)	membrane
SRC	v-src sarcoma (Schmidt-Ruppin A-2) viral oncogene homolog (avian)	membrane
SRM	spermidine synthase	membrane
SSR3	signal sequence receptor, gamma (translocon-associated protein gamma)	membrane
STK10	serine/threonine kinase 10	membrane
STT3A	STT3, subunit of the oligosaccharyltransferase complex, homolog A (S. cerevisiae)	membrane
TAGLN2	transgelin 2	membrane
TECR	trans-2,3-enoyl-CoA reductase	membrane
TF	transferrin	membrane
TFRC	transferrin receptor (p90, CD71)	membrane
TKT	transketolase	membrane
TM9SF2	transmembrane 9 superfamily member 2	membrane
TMED2	transmembrane emp24 domain trafficking protein 2	membrane
TMEM48	transmembrane protein 48	membrane
VAPA	VAMP (vesicle-associated membrane protein)-associated protein A, 33kDa	membrane
VAT1	vesicle amine transport protein 1 homolog (T. californica)	membrane
VPS11	vacuolar protein sorting 11 homolog (S. cerevisiae)	membrane
VPS16	vacuolar protein sorting 16 homolog (S. cerevisiae)	membrane
VPS35	vacuolar protein sorting 35 homolog (S. cerevisiae)	membrane
WDR45	WD repeat domain 45	membrane
MGST1	microsomal glutathione S-transferase 1	membrane
SUN2	Sad1 and UNC84 domain containing 2	membrane
PGD	phosphogluconate dehydrogenase	membrane fraction
CAPZB	capping protein (actin filament) muscle Z-line, beta	membrane, actin
ARHGAP17	Rho GTPase activating protein 17	membrane, actin cytoskeleton
BAIAP2	BAI1-associated protein 2	membrane, actin cytoskeleton
CAPZA1	capping protein (actin filament) muscle Z-line, alpha 1	membrane, actin cytoskeleton
RDX	radixin	membrane, actin cytoskeleton
SPTAN1	spectrin, alpha, non-erythrocytic 1 (alpha-fodrin)	membrane, actin cytoskeleton
CKAP4	cytoskeleton-associated protein 4	membrane, cancer	x
EPHA2	EPH receptor A2	membrane, cancer	x
RAC1	ras-related C3 botulinum toxin substrate 1 (rho family, small GTP binding protein Rac1)	membrane, cell cycle	x
MTOR	mechanistic target of rapamycin (serine/threonine kinase)	membrane, cell growth	x
ILK	integrin-linked kinase	membrane, cell prolif	x
CENPE	centromere protein E, 312kDa	microtubule cytoskeleton	x
CKAP5	cytoskeleton associated protein 5	microtubule cytoskeleton
DYNC1H1	dynein, cytoplasmic 1, heavy chain 1	microtubule cytoskeleton
DYNC1LI1	dynein, cytoplasmic 1, light intermediate chain 1	microtubule cytoskeleton
DYNC1LI2	dynein, cytoplasmic 1, light intermediate chain 2	microtubule cytoskeleton
DYNLT1	dynein, light chain, Tctex-type 1	microtubule cytoskeleton
IPI00850173.1		microtubule cytoskeleton
KIF23	kinesin family member 23	microtubule cytoskeleton
KIF2C	kinesin family member 2C	microtubule cytoskeleton	x
MAP1B	microtubule-associated protein 1B	microtubule cytoskeleton
MAP1S	microtubule-associated protein 1S	microtubule cytoskeleton
MAP4	microtubule-associated protein 4	microtubule cytoskeleton
RAE1	RAE1 RNA export 1 homolog (S. pombe)	microtubule cytoskeleton
STAU1	staufen, RNA binding protein, homolog 1 (Drosophila)	microtubule cytoskeleton
TPX2	TPX2, microtubule-associated, homolog (Xenopus laevis)	microtubule cytoskeleton
TUBA1A	tubulin, alpha 1a	microtubule cytoskeleton
TUBA1C	tubulin, alpha 1c	microtubule cytoskeleton
TUBB	tubulin, beta	microtubule cytoskeleton
TUBB2B	tubulin, beta 2B	microtubule cytoskeleton
TUBB2C	tubulin, beta 2C	microtubule cytoskeleton
TUBB4	tubulin, beta 4	microtubule cytoskeleton
TUBB6	tubulin, beta 6	microtubule cytoskeleton
UBR4	ubiquitin protein ligase E3 component n-recognin 4	microtubule cytoskeleton
AURKA	aurora kinase A	microtubule cytoskeleton, cell cycle	x
DYNLL1	dynein, light chain, LC8-type 1	microtubule cytoskeleton, cell cycle	x
EPB41L2	erythrocyte membrane protein band 4.1-like 2	microtubule cytoskeleton, cell cycle	x
RANGAP1	Ran GTPase activating protein 1	microtubule cytoskeleton, cell cycle	x
KIF20A	kinesin family member 20A	microtubule cytoskeleton, cytokinesis	x
KIF20B	kinesin family member 20B	microtubule cytoskeleton, mitosis	x
KIF22	kinesin family member 22	microtubule cytoskeleton, mitosis	x
NUDC	nuclear distribution gene C homolog (A. nidulans)	microtubule cytoskeleton, mitosis	x
PRC1	protein regulator of cytokinesis 1	microtubule cytoskeleton, mitosis	x
TUBB3	tubulin, beta 3	microtubule cytoskeleton, mitosis	x
ACTR1A	ARP1 actin-related protein 1 homolog A, centractin alpha (yeast)	microtubule organizing center
CETN2	centrin, EF-hand protein, 2	microtubule organizing center
TCP1	t-complex 1	microtubule organizing center, cell cycle	x
TUBG1	tubulin, gamma 1	microtubule organizing center, cell cycle	x
ABCE1	ATP-binding cassette, sub-family E (OABP), member 1	mitochondrion
ABCF2	ATP-binding cassette, sub-family F (GCN20), member 2	mitochondrion
ACAA2	acetyl-CoA acyltransferase 2	mitochondrion
ACLY	ATP citrate lyase	mitochondrion
ACO2	aconitase 2, mitochondrial	mitochondrion
ACOX1	acyl-CoA oxidase 1, palmitoyl	mitochondrion
ACSL4	acyl-CoA synthetase long-chain family member 4	mitochondrion
AGPS	alkylglycerone phosphate synthase	mitochondrion
ALDOA	aldolase A, fructose-bisphosphate	mitochondrion
ALDOC	aldolase C, fructose-bisphosphate	mitochondrion
ATAD3A	ATPase family, AAA domain containing 3A	mitochondrion
ATP5A1	ATP synthase, H+ transporting, mitochondrial F1 complex, alpha subunit 1, cardiac muscle	mitochondrion
ATP5B	ATP synthase, H+ transporting, mitochondrial F1 complex, beta polypeptide	mitochondrion
ATP5C1	ATP synthase, H+ transporting, mitochondrial F1 complex, gamma polypeptide 1	mitochondrion
BCKDK	branched chain ketoacid dehydrogenase kinase	mitochondrion
C10orf2	chromosome 10 open reading frame 2	mitochondrion
C1QBP	complement component 1, q subcomponent binding protein	mitochondrion
CAT	catalase	mitochondrion
CCT7	chaperonin containing TCP1, subunit 7 (eta)	mitochondrion
CHCHD6	coiled-coil-helix-coiled-coil-helix domain containing 6	mitochondrion
CISD2	CDGSH iron sulfur domain 2	mitochondrion
COMT	catechol-O-methyltransferase	mitochondrion
COX15	COX15 homolog, cytochrome c oxidase assembly protein (yeast)	mitochondrion
CYB5B	cytochrome b5 type B (outer mitochondrial membrane)	mitochondrion
CYB5R3	cytochrome b5 reductase 3	mitochondrion
CYC1	cytochrome c-1	mitochondrion
CYCS	cytochrome c, somatic	mitochondrion
DCAKD	dephospho-CoA kinase domain containing	mitochondrion
DHX30	DEAH (Asp-Glu-Ala-His) box polypeptide 30	mitochondrion
DLAT	dihydrolipoamide S-acetyltransferase	mitochondrion
DLST	dihydrolipoamide S-succinyltransferase (E2 component of 2-oxo-glutarate complex)	mitochondrion
DNAJC11	DnaJ (Hsp40) homolog, subfamily C, member 11	mitochondrion
ECHS1	enoyl CoA hydratase, short chain, 1, mitochondrial	mitochondrion
FASN	fatty acid synthase	mitochondrion
FH	fumarate hydratase	mitochondrion
FKBP8	FK506 binding protein 8, 38kDa	mitochondrion
GARS	glycyl-tRNA synthetase	mitochondrion
GFM1	G elongation factor, mitochondrial 1	mitochondrion
GLUD1	glutamate dehydrogenase 1	mitochondrion
GPX4	glutathione peroxidase 4 (phospholipid hydroperoxidase)	mitochondrion
HADH	hydroxyacyl-CoA dehydrogenase	mitochondrion
HADHA	hydroxyacyl-CoA dehydrogenase/3-ketoacyl-CoA thiolase/enoyl-CoA hydratase (trifunctional protein), alpha subunit	mitochondrion
HADHB	hydroxyacyl-CoA dehydrogenase/3-ketoacyl-CoA thiolase/enoyl-CoA hydratase (trifunctional protein), beta subunit	mitochondrion
HK2	hexokinase 2	mitochondrion
HMGCL	3-hydroxymethyl-3-methylglutaryl-CoA lyase	mitochondrion
HSPD1	heat shock 60kDa protein 1 (chaperonin)	mitochondrion
IDH2	isocitrate dehydrogenase 2 (NADP+), mitochondrial	mitochondrion
IDH3B	isocitrate dehydrogenase 3 (NAD+) beta	mitochondrion
KARS	lysyl-tRNA synthetase	mitochondrion
LETM1	leucine zipper-EF-hand containing transmembrane protein 1	mitochondrion
LONP1	lon peptidase 1, mitochondrial	mitochondrion
MDH2	malate dehydrogenase 2, NAD (mitochondrial)	mitochondrion
ME2	malic enzyme 2, NAD(+)-dependent, mitochondrial	mitochondrion
MTCH2	mitochondrial carrier homolog 2 (C. elegans)	mitochondrion
MTHFD1	methylenetetrahydrofolate dehydrogenase (NADP+ dependent) 1, methenyltetrahydrofolate cyclohydrolase, formyltetrahydrofolate synthetase	mitochondrion
MTHFD1L	methylenetetrahydrofolate dehydrogenase (NADP+ dependent) 1-like	mitochondrion
MTHFD2	methylenetetrahydrofolate dehydrogenase (NADP+ dependent) 2, methenyltetrahydrofolate cyclohydrolase	mitochondrion
MTX1	metaxin 1	mitochondrion
NDUFA4	NADH dehydrogenase (ubiquinone) 1 alpha subcomplex, 4, 9kDa	mitochondrion
NDUFA8	NADH dehydrogenase (ubiquinone) 1 alpha subcomplex, 8, 19kDa	mitochondrion
NDUFS3	NADH dehydrogenase (ubiquinone) Fe-S protein 3, 30kDa (NADH-coenzyme Q reductase)	mitochondrion
PDHA1	pyruvate dehydrogenase (lipoamide) alpha 1	mitochondrion
PDHB	pyruvate dehydrogenase (lipoamide) beta	mitochondrion
PHB2	prohibitin 2	mitochondrion
PITRM1	pitrilysin metallopeptidase 1	mitochondrion
PNPT1	polyribonucleotide nucleotidyltransferase 1	mitochondrion
PRDX3	peroxiredoxin 3	mitochondrion
PTRH2	peptidyl-tRNA hydrolase 2	mitochondrion
SARS	seryl-tRNA synthetase	mitochondrion
SDHA	succinate dehydrogenase complex, subunit A, flavoprotein (Fp)	mitochondrion
SHMT1	serine hydroxymethyltransferase 1 (soluble)	mitochondrion
SHMT2	serine hydroxymethyltransferase 2 (mitochondrial)	mitochondrion
SLC25A12	solute carrier family 25 (mitochondrial carrier, Aralar), member 12	mitochondrion
SLC25A13	solute carrier family 25, member 13 (citrin)	mitochondrion
SLC25A22	solute carrier family 25 (mitochondrial carrier: glutamate), member 22	mitochondrion
SLC25A3	solute carrier family 25 (mitochondrial carrier; phosphate carrier), member 3	mitochondrion
SLC25A5	solute carrier family 25 (mitochondrial carrier; adenine nucleotide translocator), member 5	mitochondrion
SOD2	superoxide dismutase 2, mitochondrial	mitochondrion
SUCLG1	succinate-CoA ligase, alpha subunit	mitochondrion
SUPV3L1	suppressor of var1, 3-like 1 (S. cerevisiae)	mitochondrion
TIMM17B	translocase of inner mitochondrial membrane 17 homolog B (yeast)	mitochondrion
TOMM34	translocase of outer mitochondrial membrane 34	mitochondrion
TOMM70A	translocase of outer mitochondrial membrane 70 homolog A (S. cerevisiae)	mitochondrion
TUFM	Tu translation elongation factor, mitochondrial	mitochondrion
UQCRC1	ubiquinol-cytochrome c reductase core protein I	mitochondrion
UQCRQ	ubiquinol-cytochrome c reductase, complex III subunit VII, 9.5kDa	mitochondrion
VARS	valyl-tRNA synthetase	mitochondrion
VDAC1	voltage-dependent anion channel 1	mitochondrion
VDAC2	voltage-dependent anion channel 2	mitochondrion
VDAC3	voltage-dependent anion channel 3	mitochondrion
YARS2	tyrosyl-tRNA synthetase 2, mitochondrial	mitochondrion
YWHAE	tyrosine 3-monooxygenase/tryptophan 5-monooxygenase activation protein, epsilon polypeptide	mitochondrion
AIFM1	apoptosis-inducing factor, mitochondrion-associated, 1	mitochondrion
COX4NB	COX4 neighbor	mitochondrion
LRPPRC	leucine-rich PPR-motif containing	mitochondrion
MARCH5	membrane-associated ring finger (C3HC4) 5	mitochondrion
TIMM13	translocase of inner mitochondrial membrane 13 homolog (yeast)	mitochondrion
UQCRC2	ubiquinol-cytochrome c reductase core protein II	mitochondrion
PRDX1	peroxiredoxin 1	mitochondrion, cancer	x
PHB	prohibitin	mitochondrion, cell cycle	x
DDX1	DEAD (Asp-Glu-Ala-Asp) box polypeptide 1	nucleus
0610009D07Rik		nucleus
AATF	apoptosis antagonizing transcription factor	nucleus
ACIN1	apoptotic chromatin condensation inducer 1	nucleus
AHNAK	AHNAK nucleoprotein	nucleus
ANAPC4	anaphase promoting complex subunit 4	nucleus
ANP32E	acidic (leucine-rich) nuclear phosphoprotein 32 family, member E	nucleus
API5	apoptosis inhibitor 5	nucleus
AQR	aquarius homolog (mouse)	nucleus
ARID1A	AT rich interactive domain 1A (SWI-like)	nucleus
ARID2	AT rich interactive domain 2 (ARID, RFX-like)	nucleus
ASH2L	ash2 (absent, small, or homeotic)-like (Drosophila)	nucleus
BAG6	BCL2-associated athanogene 6	nucleus
BANF1	barrier to autointegration factor 1	nucleus
BAT1	HLA-B associated transcript 1	nucleus
BAZ1A	bromodomain adjacent to zinc finger domain, 1A	nucleus
BAZ1B	bromodomain adjacent to zinc finger domain, 1B	nucleus
BCAS2	breast carcinoma amplified sequence 2	nucleus
BCLAF1	BCL2-associated transcription factor 1	nucleus
BMS1	BMS1 homolog, ribosome assembly protein (yeast)	nucleus
BOP1	block of proliferation 1	nucleus
BRD2	bromodomain containing 2	nucleus
BRD4	bromodomain containing 4	nucleus
BRE	brain and reproductive organ-expressed (TNFRSF1A modulator)	nucleus
BRIX1	BRX1, biogenesis of ribosomes, homolog (S. cerevisiae)	nucleus
BRPF1	bromodomain and PHD finger containing, 1	nucleus
C14orf166	chromosome 14 open reading frame 166	nucleus
C14orf49	chromosome 14 open reading frame 49	nucleus
C19orf29	chromosome 19 open reading frame 29	nucleus
C1orf107	chromosome 1 open reading frame 107	nucleus
C1orf77	chromosome 1 open reading frame 77	nucleus
CACYBP	calcyclin binding protein	nucleus
CAPNS1	calpain, small subunit 1	nucleus
CARM1	coactivator-associated arginine methyltransferase 1	nucleus
CASK	calcium/calmodulin-dependent serine protein kinase (MAGUK family)	nucleus
CBFB	core-binding factor, beta subunit	nucleus
CBX3	chromobox homolog 3	nucleus
CCAR1	cell division cycle and apoptosis regulator 1	nucleus
CCT2	chaperonin containing TCP1, subunit 2 (beta)	nucleus
CCT5	chaperonin containing TCP1, subunit 5 (epsilon)	nucleus
CCT8	chaperonin containing TCP1, subunit 8 (theta)	nucleus
CDC40	cell division cycle 40 homolog (S. cerevisiae)	nucleus
CDC73	cell division cycle 73, Paf1/RNA polymerase II complex component, homolog (S. cerevisiae)	nucleus
CDK12	cyclin-dependent kinase 12	nucleus
CDYL	chromodomain protein, Y-like	nucleus
CEBPB	CCAAT/enhancer binding protein (C/EBP), beta	nucleus
CEBPZ	CCAAT/enhancer binding protein (C/EBP), zeta	nucleus
CELF1	CUGBP, Elav-like family member 1	nucleus
CHD1	chromodomain helicase DNA binding protein 1	nucleus
CHD5	chromodomain helicase DNA binding protein 5	nucleus
CHD8	chromodomain helicase DNA binding protein 8	nucleus
CIRBP	cold inducible RNA binding protein	nucleus
CIRH1A	cirrhosis, autosomal recessive 1A (cirhin)	nucleus
CLIC1	chloride intracellular channel 1	nucleus
CLK3	CDC-like kinase 3	nucleus
CMAS	cytidine monophosphate N-acetylneuraminic acid synthetase	nucleus
CNOT1	CCR4-NOT transcription complex, subunit 1	nucleus
COPS3	COP9 constitutive photomorphogenic homolog subunit 3 (Arabidopsis)	nucleus
CPSF2	cleavage and polyadenylation specific factor 2, 100kDa	nucleus
CPSF3	cleavage and polyadenylation specific factor 3, 73kDa	nucleus
CPSF6	cleavage and polyadenylation specific factor 6, 68kDa	nucleus
CPSF7	cleavage and polyadenylation specific factor 7, 59kDa	nucleus
CSNK2A1	casein kinase 2, alpha 1 polypeptide	nucleus
CSTF2	cleavage stimulation factor, 3' pre-RNA, subunit 2, 64kDa	nucleus
CSTF3	cleavage stimulation factor, 3' pre-RNA, subunit 3, 77kDa	nucleus
CTBP1	C-terminal binding protein 1	nucleus
CTBP2	C-terminal binding protein 2	nucleus
CTCF	CCCTC-binding factor (zinc finger protein)	nucleus
CTDNEP1	CTD nuclear envelope phosphatase 1	nucleus
CTNND1	catenin (cadherin-associated protein), delta 1	nucleus
CTR9	Ctr9, Paf1/RNA polymerase II complex component, homolog (S. cerevisiae)	nucleus
CWC15	CWC15 spliceosome-associated protein homolog (S. cerevisiae)	nucleus
DAZAP1	DAZ associated protein 1	nucleus
DDB1	damage-specific DNA binding protein 1, 127kDa	nucleus
DDX10	DEAD (Asp-Glu-Ala-Asp) box polypeptide 10	nucleus
DDX17	DEAD (Asp-Glu-Ala-Asp) box polypeptide 17	nucleus
DDX18	DEAD (Asp-Glu-Ala-Asp) box polypeptide 18	nucleus
DDX19A	DEAD (Asp-Glu-Ala-As) box polypeptide 19A	nucleus
DDX21	DEAD (Asp-Glu-Ala-Asp) box polypeptide 21	nucleus
DDX23	DEAD (Asp-Glu-Ala-Asp) box polypeptide 23	nucleus
DDX24	DEAD (Asp-Glu-Ala-Asp) box polypeptide 24	nucleus
DDX27	DEAD (Asp-Glu-Ala-Asp) box polypeptide 27	nucleus
DDX3X	DEAD (Asp-Glu-Ala-Asp) box polypeptide 3, X-linked	nucleus
DDX46	DEAD (Asp-Glu-Ala-Asp) box polypeptide 46	nucleus
DDX47	DEAD (Asp-Glu-Ala-Asp) box polypeptide 47	nucleus
DDX5	DEAD (Asp-Glu-Ala-Asp) box polypeptide 5	nucleus
DDX50	DEAD (Asp-Glu-Ala-Asp) box polypeptide 50	nucleus
DDX51	DEAD (Asp-Glu-Ala-Asp) box polypeptide 51	nucleus
DDX56	DEAD (Asp-Glu-Ala-Asp) box polypeptide 56	nucleus
DEK	DEK oncogene	nucleus
DHX15	DEAH (Asp-Glu-Ala-His) box polypeptide 15	nucleus
DHX8	DEAH (Asp-Glu-Ala-His) box polypeptide 8	nucleus
DHX9	DEAH (Asp-Glu-Ala-His) box polypeptide 9	nucleus
DIMT1L	DIM1 dimethyladenosine transferase 1-like (S. cerevisiae)	nucleus
DIS3	DIS3 mitotic control homolog (S. cerevisiae)	nucleus
DNAJB6	DnaJ (Hsp40) homolog, subfamily B, member 6	nucleus
DNAJC8	DnaJ (Hsp40) homolog, subfamily C, member 8	nucleus
DNMT1	DNA (cytosine-5-)-methyltransferase 1	nucleus
DNMT3A	DNA (cytosine-5-)-methyltransferase 3 alpha	nucleus
DNTTIP1	deoxynucleotidyltransferase, terminal, interacting protein 1	nucleus
DPF2	D4, zinc and double PHD fingers family 2	nucleus
EBNA1BP2	EBNA1 binding protein 2	nucleus
EDC4	enhancer of mRNA decapping 4	nucleus
EFTUD1	elongation factor Tu GTP binding domain containing 1	nucleus
EFTUD2	elongation factor Tu GTP binding domain containing 2	nucleus
EHMT1	euchromatic histone-lysine N-methyltransferase 1	nucleus
EHMT2	euchromatic histone-lysine N-methyltransferase 2	nucleus
EIF2S1	eukaryotic translation initiation factor 2, subunit 1 alpha, 35kDa	nucleus
EIF3A	eukaryotic translation initiation factor 3, subunit A	nucleus
EIF3E	eukaryotic translation initiation factor 3, subunit E	nucleus
EIF3K	eukaryotic translation initiation factor 3, subunit K	nucleus
EIF5A	eukaryotic translation initiation factor 5A	nucleus
EIF6	eukaryotic translation initiation factor 6	nucleus
ELAVL1	ELAV (embryonic lethal, abnormal vision, Drosophila)-like 1 (Hu antigen R)	nucleus
ELP3	elongation protein 3 homolog (S. cerevisiae)	nucleus
EMG1	EMG1 nucleolar protein homolog (S. cerevisiae)	nucleus
ENY2	enhancer of yellow 2 homolog (Drosophila)	nucleus
EP300	E1A binding protein p300	nucleus
ESF1	ESF1, nucleolar pre-rRNA processing protein, homolog (S. cerevisiae)	nucleus
EWSR1	Ewing sarcoma breakpoint region 1	nucleus
EXOSC2	exosome component 2	nucleus
EXOSC4	exosome component 4	nucleus
EXOSC5	exosome component 5	nucleus
FBL	fibrillarin	nucleus
FIP1L1	FIP1 like 1 (S. cerevisiae)	nucleus
FKBP3	FK506 binding protein 3, 25kDa	nucleus
FKBP4	FK506 binding protein 4, 59kDa	nucleus
FLYWCH1	FLYWCH-type zinc finger 1	nucleus
FOSB	FBJ murine osteosarcoma viral oncogene homolog B	nucleus
FOSL1	FOS-like antigen 1	nucleus
FOXK2	forkhead box K2	nucleus
FTSJ3	FtsJ homolog 3 (E. coli)	nucleus
FUS	fused in sarcoma	nucleus
FXR1	fragile X mental retardation, autosomal homolog 1	nucleus
GATAD1	GATA zinc finger domain containing 1	nucleus
GATAD2A	GATA zinc finger domain containing 2A	nucleus
GATAD2B	GATA zinc finger domain containing 2B	nucleus
GCN1L1	GCN1 general control of amino-acid synthesis 1-like 1 (yeast)	nucleus
GEMIN4	gem (nuclear organelle) associated protein 4	nucleus
GLYR1	glyoxylate reductase 1 homolog (Arabidopsis)	nucleus
Gm4130		nucleus
GNL3	guanine nucleotide binding protein-like 3 (nucleolar)	nucleus
GNL3L	guanine nucleotide binding protein-like 3 (nucleolar)-like	nucleus
GPS1	G protein pathway suppressor 1	nucleus
GSK3B	glycogen synthase kinase 3 beta	nucleus
GSTP1	glutathione S-transferase pi 1	nucleus
GTF2H1	general transcription factor IIH, polypeptide 1, 62kDa	nucleus
GTF2H4	general transcription factor IIH, polypeptide 4, 52kDa	nucleus
GTF2I	general transcription factor IIi	nucleus
GTF3C2	general transcription factor IIIC, polypeptide 2, beta 110kDa	nucleus
GTF3C4	general transcription factor IIIC, polypeptide 4, 90kDa	nucleus
GTPBP4	GTP binding protein 4	nucleus
H1FX	H1 histone family, member X	nucleus
H2AFX	H2A histone family, member X	nucleus
H2AFY	H2A histone family, member Y	nucleus
H3F3A;H3F3B;LOC644914;LOC440926	H3 histone, family 3A;H3 histone, family 3B (H3.3B)	nucleus
HBA2;HBA1	hemoglobin, alpha 1;hemoglobin, alpha 2	nucleus
HCFC1	host cell factor C1 (VP16-accessory protein)	nucleus
HDAC1	histone deacetylase 1	nucleus
HDAC2	histone deacetylase 2	nucleus
HELLS	helicase, lymphoid-specific	nucleus
HIST1H1D	histone cluster 1, H1d	nucleus
HIST1H2AA	histone cluster 1, H2aa	nucleus
HIST1H2AE	histone cluster 1, H2ae	nucleus
HIST1H2BN	histone cluster 1, H2bn	nucleus
HIST2H2AB	histone cluster 2, H2ab	nucleus
HIST2H2BF	histone cluster 2, H2bf	nucleus
HIST2H3D;HIST2H3A;HIST2H3C	histone cluster 2, H3a;histone cluster 2, H3c;histone cluster 2, H3d	nucleus
HMGA2	high mobility group AT-hook 2	nucleus
HMGB2	high-mobility group box 2	nucleus
HMOX1	heme oxygenase (decycling) 1	nucleus
HNRNPA2B1	heterogeneous nuclear ribonucleoprotein A2/B1	nucleus
HNRNPA3	heterogeneous nuclear ribonucleoprotein A3	nucleus
HNRNPAB	heterogeneous nuclear ribonucleoprotein A/B	nucleus
HNRNPD	heterogeneous nuclear ribonucleoprotein D (AU-rich element RNA binding protein 1, 37kDa)	nucleus
HNRNPF	heterogeneous nuclear ribonucleoprotein F	nucleus
HNRNPH1	heterogeneous nuclear ribonucleoprotein H1 (H)	nucleus
HNRNPH2	heterogeneous nuclear ribonucleoprotein H2 (H')	nucleus
HNRNPH3	heterogeneous nuclear ribonucleoprotein H3 (2H9)	nucleus
HNRNPK	heterogeneous nuclear ribonucleoprotein K	nucleus
HNRNPL	heterogeneous nuclear ribonucleoprotein L	nucleus
HNRNPM	heterogeneous nuclear ribonucleoprotein M	nucleus
HNRNPR	heterogeneous nuclear ribonucleoprotein R	nucleus
HNRNPU	heterogeneous nuclear ribonucleoprotein U (scaffold attachment factor A)	nucleus
HNRPDL	heterogeneous nuclear ribonucleoprotein D-like	nucleus
HNRPLL	heterogeneous nuclear ribonucleoprotein L-like	nucleus
HP1BP3	heterochromatin protein 1, binding protein 3	nucleus
HSP90B1	heat shock protein 90kDa beta (Grp94), member 1	nucleus
HSPA5	heat shock 70kDa protein 5 (glucose-regulated protein, 78kDa)	nucleus
HUWE1	HECT, UBA and WWE domain containing 1	nucleus
IKBKAP	inhibitor of kappa light polypeptide gene enhancer in B-cells, kinase complex-associated protein	nucleus
ILF2	interleukin enhancer binding factor 2, 45kDa	nucleus
ILF3	interleukin enhancer binding factor 3, 90kDa	nucleus
IMP4	IMP4, U3 small nucleolar ribonucleoprotein, homolog (yeast)	nucleus
INTS1	integrator complex subunit 1	nucleus
INTS10	integrator complex subunit 10	nucleus
INTS3	integrator complex subunit 3	nucleus
INTS4	integrator complex subunit 4	nucleus
INTS5	integrator complex subunit 5	nucleus
INTS7	integrator complex subunit 7	nucleus
INTS9	integrator complex subunit 9	nucleus
IPO5	importin 5	nucleus
IPO7	importin 7	nucleus
IPO9	importin 9	nucleus
IRF2BP2	interferon regulatory factor 2 binding protein 2	nucleus
ITCH	itchy E3 ubiquitin protein ligase homolog (mouse)	nucleus
ITPR3	inositol 1,4,5-triphosphate receptor, type 3	nucleus
JUNB	jun B proto-oncogene	nucleus
KAT2A	K(lysine) acetyltransferase 2A	nucleus
KDM1A	lysine (K)-specific demethylase 1A	nucleus
KIAA0020	KIAA0020	nucleus
KPNA1	karyopherin alpha 1 (importin alpha 5)	nucleus
KPNA2	karyopherin alpha 2 (RAG cohort 1, importin alpha 1)	nucleus
KPNA6	karyopherin alpha 6 (importin alpha 7)	nucleus
KRR1	KRR1, small subunit (SSU) processome component, homolog (yeast)	nucleus
LAS1L	LAS1-like (S. cerevisiae)	nucleus
LBR	lamin B receptor	nucleus
LEMD3	LEM domain containing 3	nucleus
LIG1	ligase I, DNA, ATP-dependent	nucleus
LMNA	lamin A/C	nucleus
LMNB1	lamin B1	nucleus
LMNB2	lamin B2	nucleus
LOC680063		nucleus
LOC684681		nucleus
LSM4	LSM4 homolog, U6 small nuclear RNA associated (S. cerevisiae)	nucleus
LUC7L	LUC7-like (S. cerevisiae)	nucleus
LUC7L2	LUC7-like 2 (S. cerevisiae)	nucleus
LUC7L3	LUC7-like 3 (S. cerevisiae)	nucleus
MAK16	MAK16 homolog (S. cerevisiae)	nucleus
MAP4K4	mitogen-activated protein kinase kinase kinase kinase 4	nucleus
MATR3	matrin 3	nucleus
MAZ	MYC-associated zinc finger protein (purine-binding transcription factor)	nucleus
MBD2	methyl-CpG binding domain protein 2	nucleus
MCM2	minichromosome maintenance complex component 2	nucleus
MCM4	minichromosome maintenance complex component 4	nucleus
MCM6	minichromosome maintenance complex component 6	nucleus
MCM7	minichromosome maintenance complex component 7	nucleus
MDC1	mediator of DNA-damage checkpoint 1	nucleus
MDN1	MDN1, midasin homolog (yeast)	nucleus
MED12	mediator complex subunit 12	nucleus
MED21	mediator complex subunit 21	nucleus
MKI67IP	MKI67 (FHA domain) interacting nucleolar phosphoprotein	nucleus
MLL	myeloid/lymphoid or mixed-lineage leukemia (trithorax homolog, Drosophila)	nucleus
MORF4L1	mortality factor 4 like 1	nucleus
MORF4L2	mortality factor 4 like 2	nucleus
MPHOSPH10	M-phase phosphoprotein 10 (U3 small nucleolar ribonucleoprotein)	nucleus
MPHOSPH8	M-phase phosphoprotein 8	nucleus
MRE11A	MRE11 meiotic recombination 11 homolog A (S. cerevisiae)	nucleus
MRTO4	mRNA turnover 4 homolog (S. cerevisiae)	nucleus
MSH2	mutS homolog 2, colon cancer, nonpolyposis type 1 (E. coli)	nucleus
MTA1	metastasis associated 1	nucleus
MYBBP1A	MYB binding protein (P160) 1a	nucleus
MYST2	MYST histone acetyltransferase 2	nucleus
NAA11	N(alpha)-acetyltransferase 11, NatA catalytic subunit	nucleus
NAA15	N(alpha)-acetyltransferase 15, NatA auxiliary subunit	nucleus
NAA38	N(alpha)-acetyltransferase 38, NatC auxiliary subunit	nucleus
NACA	nascent polypeptide-associated complex alpha subunit	nucleus
NAP1L1	nucleosome assembly protein 1-like 1	nucleus
NAP1L4	nucleosome assembly protein 1-like 4	nucleus
NASP	nuclear autoantigenic sperm protein (histone-binding)	nucleus
NAT10	N-acetyltransferase 10 (GCN5-related)	nucleus
NCAPD2	non-SMC condensin I complex, subunit D2	nucleus
NCAPG	non-SMC condensin I complex, subunit G	nucleus
NCL	nucleolin	nucleus
NCOA5	nuclear receptor coactivator 5	nucleus
NCOR2	nuclear receptor corepressor 2	nucleus
NFIB	nuclear factor I/B	nucleus
NFIC	nuclear factor I/C (CCAAT-binding transcription factor)	nucleus
NFKB2	nuclear factor of kappa light polypeptide gene enhancer in B-cells 2 (p49/p100)	nucleus
NHP2	NHP2 ribonucleoprotein homolog (yeast)	nucleus
NHP2L1	NHP2 non-histone chromosome protein 2-like 1 (S. cerevisiae)	nucleus
NIP7	nuclear import 7 homolog (S. cerevisiae)	nucleus
NIPBL	Nipped-B homolog (Drosophila)	nucleus
NOB1	NIN1/RPN12 binding protein 1 homolog (S. cerevisiae)	nucleus
NOC2L	nucleolar complex associated 2 homolog (S. cerevisiae)	nucleus
NOC3L	nucleolar complex associated 3 homolog (S. cerevisiae)	nucleus
NOC4L	nucleolar complex associated 4 homolog (S. cerevisiae)	nucleus
NOL10	nucleolar protein 10	nucleus
NOL6	nucleolar protein family 6 (RNA-associated)	nucleus
NOL7	nucleolar protein 7, 27kDa	nucleus
NOL9	nucleolar protein 9	nucleus
NOLC1	nucleolar and coiled-body phosphoprotein 1	nucleus
NOM1	nucleolar protein with MIF4G domain 1	nucleus
NONO	non-POU domain containing, octamer-binding	nucleus
NOP10	NOP10 ribonucleoprotein homolog (yeast)	nucleus
NOP2	NOP2 nucleolar protein homolog (yeast)	nucleus
NOP56	NOP56 ribonucleoprotein homolog (yeast)	nucleus
NOP58	NOP58 ribonucleoprotein homolog (yeast)	nucleus
NPLOC4	nuclear protein localization 4 homolog (S. cerevisiae)	nucleus
NPM3	nucleophosmin/nucleoplasmin 3	nucleus
NSUN2	NOP2/Sun domain family, member 2	nucleus
NUDT21	nudix (nucleoside diphosphate linked moiety X)-type motif 21	nucleus
NUP153	nucleoporin 153kDa	nucleus
NUP155	nucleoporin 155kDa	nucleus
NUP188	nucleoporin 188kDa	nucleus
NUP205	nucleoporin 205kDa	nucleus
NUP214	nucleoporin 214kDa	nucleus
NUP35	nucleoporin 35kDa	nucleus
NUP62	nucleoporin 62kDa	nucleus
NUP88	nucleoporin 88kDa	nucleus
NUP93	nucleoporin 93kDa	nucleus
NUPL1	nucleoporin like 1	nucleus
NXF1	nuclear RNA export factor 1	nucleus
OGFR	opioid growth factor receptor	nucleus
OGT	O-linked N-acetylglucosamine (GlcNAc) transferase (UDP-N-acetylglucosamine:polypeptide-N-acetylglucosaminyl transferase)	nucleus
ORC4	origin recognition complex, subunit 4	nucleus
PABPC1	poly(A) binding protein, cytoplasmic 1	nucleus
PAF1	Paf1, RNA polymerase II associated factor, homolog (S. cerevisiae)	nucleus
PARP1	poly (ADP-ribose) polymerase 1	nucleus
PCBP1	poly(rC) binding protein 1	nucleus
PCBP2	poly(rC) binding protein 2	nucleus
PCIF1	PDX1 C-terminal inhibiting factor 1	nucleus
PDCD11	programmed cell death 11	nucleus
PDS5A	PDS5, regulator of cohesion maintenance, homolog A (S. cerevisiae)	nucleus
PDS5B	PDS5, regulator of cohesion maintenance, homolog B (S. cerevisiae)	nucleus
PES1	pescadillo homolog 1, containing BRCT domain (zebrafish)	nucleus
PGRMC1	progesterone receptor membrane component 1	nucleus
PHF12	PHD finger protein 12	nucleus
PHF6	PHD finger protein 6	nucleus
PICALM	phosphatidylinositol binding clathrin assembly protein	nucleus
PKM2	pyruvate kinase, muscle	nucleus
PKN3	protein kinase N3	nucleus
PLRG1	pleiotropic regulator 1 (PRL1 homolog, Arabidopsis)	nucleus
PNN	pinin, desmosome associated protein	nucleus
POLR1A	polymerase (RNA) I polypeptide A, 194kDa	nucleus
POLR1B	polymerase (RNA) I polypeptide B, 128kDa	nucleus
POLR1C	polymerase (RNA) I polypeptide C, 30kDa	nucleus
POLR2A	polymerase (RNA) II (DNA directed) polypeptide A, 220kDa	nucleus
POLR2B	polymerase (RNA) II (DNA directed) polypeptide B, 140kDa	nucleus
POLR2D	polymerase (RNA) II (DNA directed) polypeptide D	nucleus
POLR2E	polymerase (RNA) II (DNA directed) polypeptide E, 25kDa	nucleus
POLR2G	polymerase (RNA) II (DNA directed) polypeptide G	nucleus
POLR2J3	polymerase (RNA) II (DNA directed) polypeptide J3	nucleus
POM121	POM121 membrane glycoprotein	nucleus
PPAN	peter pan homolog (Drosophila)	nucleus
PPIA	peptidylprolyl isomerase A (cyclophilin A)	nucleus
PPM1G	protein phosphatase, Mg2+/Mn2+ dependent, 1G	nucleus
PPP1CB	protein phosphatase 1, catalytic subunit, beta isozyme	nucleus
PPP1R10	protein phosphatase 1, regulatory (inhibitor) subunit 10	nucleus
PPP2R5D	protein phosphatase 2, regulatory subunit B', delta	nucleus
PQBP1	polyglutamine binding protein 1	nucleus
PRMT1	protein arginine methyltransferase 1	nucleus
PRMT5	protein arginine methyltransferase 5	nucleus
PRPF19	PRP19/PSO4 pre-mRNA processing factor 19 homolog (S. cerevisiae)	nucleus
PRPF3	PRP3 pre-mRNA processing factor 3 homolog (S. cerevisiae)	nucleus
PRPF31	PRP31 pre-mRNA processing factor 31 homolog (S. cerevisiae)	nucleus
PRPF38A	PRP38 pre-mRNA processing factor 38 (yeast) domain containing A	nucleus
PRPF38B	PRP38 pre-mRNA processing factor 38 (yeast) domain containing B	nucleus
PRPF40A	PRP40 pre-mRNA processing factor 40 homolog A (S. cerevisiae)	nucleus
PRPF4B	PRP4 pre-mRNA processing factor 4 homolog B (yeast)	nucleus
PRPF6	PRP6 pre-mRNA processing factor 6 homolog (S. cerevisiae)	nucleus
PSIP1	PC4 and SFRS1 interacting protein 1	nucleus
PSMA4	proteasome (prosome, macropain) subunit, alpha type, 4	nucleus
PSMA5	proteasome (prosome, macropain) subunit, alpha type, 5	nucleus
PSMB1	proteasome (prosome, macropain) subunit, beta type, 1	nucleus
PSMC1	proteasome (prosome, macropain) 26S subunit, ATPase, 1	nucleus
PSMC2	proteasome (prosome, macropain) 26S subunit, ATPase, 2	nucleus
PSMC5	proteasome (prosome, macropain) 26S subunit, ATPase, 5	nucleus
PSME3	proteasome (prosome, macropain) activator subunit 3 (PA28 gamma; Ki)	nucleus
PTBP1	polypyrimidine tract binding protein 1	nucleus
PTGES3	prostaglandin E synthase 3 (cytosolic)	nucleus
PTGS2	prostaglandin-endoperoxide synthase 2 (prostaglandin G/H synthase and cyclooxygenase)	nucleus
PUF60	poly-U binding splicing factor 60KDa	nucleus
PWP1	PWP1 homolog (S. cerevisiae)	nucleus
PWP2	PWP2 periodic tryptophan protein homolog (yeast)	nucleus
RAD23B	RAD23 homolog B (S. cerevisiae)	nucleus
RAD50	RAD50 homolog (S. cerevisiae)	nucleus
RALY	RNA binding protein, autoantigenic (hnRNP-associated with lethal yellow homolog (mouse))	nucleus
RAN	RAN, member RAS oncogene family	nucleus
RBBP4	retinoblastoma binding protein 4	nucleus
RBBP7	retinoblastoma binding protein 7	nucleus
RBM10	RNA binding motif protein 10	nucleus
RBM14	RNA binding motif protein 14	nucleus
RBM16	RNA binding motif protein 16	nucleus
RBM22	RNA binding motif protein 22	nucleus
RBM25	RNA binding motif protein 25	nucleus
RBM28	RNA binding motif protein 28	nucleus
RBM39	RNA binding motif protein 39	nucleus
RBM42	RNA binding motif protein 42	nucleus
RBM8A	RNA binding motif protein 8A	nucleus
RBPJ	recombination signal binding protein for immunoglobulin kappa J region	nucleus
RCC1	regulator of chromosome condensation 1	nucleus
RELA	v-rel reticuloendotheliosis viral oncogene homolog A (avian)	nucleus
RFC1	replication factor C (activator 1) 1, 145kDa	nucleus
RFC3	replication factor C (activator 1) 3, 38kDa	nucleus
RFC4	replication factor C (activator 1) 4, 37kDa	nucleus
RFC5	replication factor C (activator 1) 5, 36.5kDa	nucleus
RNASEH2A	ribonuclease H2, subunit A	nucleus
RNASEH2B	ribonuclease H2, subunit B	nucleus
RNF2	ring finger protein 2	nucleus
RNPS1	RNA binding protein S1, serine-rich domain	nucleus
RPA1	replication protein A1, 70kDa	nucleus
RPP14	ribonuclease P/MRP 14kDa subunit	nucleus
RPP30	ribonuclease P/MRP 30kDa subunit	nucleus
RPS6KA1	ribosomal protein S6 kinase, 90kDa, polypeptide 1	nucleus
RRP1	ribosomal RNA processing 1 homolog (S. cerevisiae)	nucleus
RRP12	ribosomal RNA processing 12 homolog (S. cerevisiae)	nucleus
RRP1B	ribosomal RNA processing 1 homolog B (S. cerevisiae)	nucleus
RRP9	ribosomal RNA processing 9, small subunit (SSU) processome component, homolog (yeast)	nucleus
RRS1	RRS1 ribosome biogenesis regulator homolog (S. cerevisiae)	nucleus
RUVBL1	RuvB-like 1 (E. coli)	nucleus
RUVBL2	RuvB-like 2 (E. coli)	nucleus
RYBP	RING1 and YY1 binding protein	nucleus
S100A11	S100 calcium binding protein A11	nucleus
SAFB	scaffold attachment factor B	nucleus
SAP18	Sin3A-associated protein, 18kDa	nucleus
SAP30	Sin3A-associated protein, 30kDa	nucleus
SARNP	SAP domain containing ribonucleoprotein	nucleus
SART1	squamous cell carcinoma antigen recognized by T cells	nucleus
SDAD1	SDA1 domain containing 1	nucleus
SF1	splicing factor 1	nucleus
SF3A1	splicing factor 3a, subunit 1, 120kDa	nucleus
SF3A2	splicing factor 3a, subunit 2, 66kDa	nucleus
SF3A3	splicing factor 3a, subunit 3, 60kDa	nucleus
SF3B1	splicing factor 3b, subunit 1, 155kDa	nucleus
SF3B2	splicing factor 3b, subunit 2, 145kDa	nucleus
SF3B3	splicing factor 3b, subunit 3, 130kDa	nucleus
SFPQ	splicing factor proline/glutamine-rich	nucleus
SKIV2L2	superkiller viralicidic activity 2-like 2 (S. cerevisiae)	nucleus
SKP1	S-phase kinase-associated protein 1	nucleus
SLTM	SAFB-like, transcription modulator	nucleus
SMAD4	SMAD family member 4	nucleus
SMARCA5	SWI/SNF related, matrix associated, actin dependent regulator of chromatin, subfamily a, member 5	nucleus
SMARCC1	SWI/SNF related, matrix associated, actin dependent regulator of chromatin, subfamily c, member 1	nucleus
SMARCC2	SWI/SNF related, matrix associated, actin dependent regulator of chromatin, subfamily c, member 2	nucleus
SMARCD1	SWI/SNF related, matrix associated, actin dependent regulator of chromatin, subfamily d, member 1	nucleus
SMARCD2	SWI/SNF related, matrix associated, actin dependent regulator of chromatin, subfamily d, member 2	nucleus
SMARCE1	SWI/SNF related, matrix associated, actin dependent regulator of chromatin, subfamily e, member 1	nucleus
SMC1A	structural maintenance of chromosomes 1A	nucleus
SMC2	structural maintenance of chromosomes 2	nucleus
SMC3	structural maintenance of chromosomes 3	nucleus
SMC4	structural maintenance of chromosomes 4	nucleus
SMCHD1	structural maintenance of chromosomes flexible hinge domain containing 1	nucleus
SMU1	smu-1 suppressor of mec-8 and unc-52 homolog (C. elegans)	nucleus
SND1	staphylococcal nuclease and tudor domain containing 1	nucleus
SNRNP200	small nuclear ribonucleoprotein 200kDa (U5)	nucleus
SNRNP40	small nuclear ribonucleoprotein 40kDa (U5)	nucleus
SNRNP70	small nuclear ribonucleoprotein 70kDa (U1)	nucleus
SNRPA1	small nuclear ribonucleoprotein polypeptide A'	nucleus
SNRPB	small nuclear ribonucleoprotein polypeptides B and B1	nucleus
SNRPD1	small nuclear ribonucleoprotein D1 polypeptide 16kDa	nucleus
SNRPD3	small nuclear ribonucleoprotein D3 polypeptide 18kDa	nucleus
SNRPF	small nuclear ribonucleoprotein polypeptide F	nucleus
SON	SON DNA binding protein	nucleus
SREK1	splicing regulatory glutamine/lysine-rich protein 1	nucleus
SRP54	signal recognition particle 54kDa	nucleus
SRRM1	serine/arginine repetitive matrix 1	nucleus
SRRM2	serine/arginine repetitive matrix 2	nucleus
SRSF10	serine/arginine-rich splicing factor 10	nucleus
SRSF3	serine/arginine-rich splicing factor 3	nucleus
SRSF7	serine/arginine-rich splicing factor 7	nucleus
SSB	Sjogren syndrome antigen B (autoantigen La)	nucleus
SSRP1	structure specific recognition protein 1	nucleus
STAG1	stromal antigen 1	nucleus
STAT3	signal transducer and activator of transcription 3 (acute-phase response factor)	nucleus
STIP1	stress-induced-phosphoprotein 1	nucleus
STRAP	serine/threonine kinase receptor associated protein	nucleus
SUN1	Sad1 and UNC84 domain containing 1	nucleus
SUPT16H	suppressor of Ty 16 homolog (S. cerevisiae)	nucleus
SUPT5H	suppressor of Ty 5 homolog (S. cerevisiae)	nucleus
SUPT6H	suppressor of Ty 6 homolog (S. cerevisiae)	nucleus
SYMPK	symplekin	nucleus
SYNCRIP	synaptotagmin binding, cytoplasmic RNA interacting protein	nucleus
TAF1	TAF1 RNA polymerase II, TATA box binding protein (TBP)-associated factor, 250kDa	nucleus
TAF10	TAF10 RNA polymerase II, TATA box binding protein (TBP)-associated factor, 30kDa	nucleus
TAF6	TAF6 RNA polymerase II, TATA box binding protein (TBP)-associated factor, 80kDa	nucleus
TAF6L	TAF6-like RNA polymerase II, p300/CBP-associated factor (PCAF)-associated factor, 65kDa	nucleus
TARDBP	TAR DNA binding protein	nucleus
TBL3	transducin (beta)-like 3	nucleus
TCEB2	transcription elongation factor B (SIII), polypeptide 2 (18kDa, elongin B)	nucleus
TCERG1	transcription elongation regulator 1	nucleus
TDP1	tyrosyl-DNA phosphodiesterase 1	nucleus
TERF2	telomeric repeat binding factor 2	nucleus
TEX10	testis expressed 10	nucleus
TFAP2A	transcription factor AP-2 alpha (activating enhancer binding protein 2 alpha)	nucleus
TFIP11	tuftelin interacting protein 11	nucleus
THOC1	THO complex 1	nucleus
THOC2	THO complex 2	nucleus
THOC3	THO complex 3	nucleus
THOC4	THO complex 4	nucleus
THOC5	THO complex 5	nucleus
THOC7	THO complex 7 homolog (Drosophila)	nucleus
TMEM209	transmembrane protein 209	nucleus
TMPO	thymopoietin	nucleus
TNPO1	transportin 1	nucleus
TOP1	topoisomerase (DNA) I	nucleus
TOP2A	topoisomerase (DNA) II alpha 170kDa	nucleus
TOP2B	topoisomerase (DNA) II beta 180kDa	nucleus
TOR1B	torsin family 1, member B (torsin B)	nucleus
TRA2A	transformer 2 alpha homolog (Drosophila)	nucleus
TRA2B	transformer 2 beta homolog (Drosophila)	nucleus
TRIM28	tripartite motif-containing 28	nucleus
TRIP12	thyroid hormone receptor interactor 12	nucleus
TRIP13	thyroid hormone receptor interactor 13	nucleus
TRRAP	transformation/transcription domain-associated protein	nucleus
TXNRD1	thioredoxin reductase 1	nucleus
U2AF2	U2 small nuclear RNA auxiliary factor 2	nucleus
UBQLN4	ubiquilin 4	nucleus
UBTF	upstream binding transcription factor, RNA polymerase I	nucleus
UBXN4	UBX domain protein 4	nucleus
UHRF1	ubiquitin-like with PHD and ring finger domains 1	nucleus
URB1	URB1 ribosome biogenesis 1 homolog (S. cerevisiae)	nucleus
URB2	URB2 ribosome biogenesis 2 homolog (S. cerevisiae)	nucleus
USP36	ubiquitin specific peptidase 36	nucleus
USP39	ubiquitin specific peptidase 39	nucleus
USP48	ubiquitin specific peptidase 48	nucleus
USP7	ubiquitin specific peptidase 7 (herpes virus-associated)	nucleus
UTP14A	UTP14, U3 small nucleolar ribonucleoprotein, homolog A (yeast)	nucleus
UTP15	UTP15, U3 small nucleolar ribonucleoprotein, homolog (S. cerevisiae)	nucleus
UTP18	UTP18, small subunit (SSU) processome component, homolog (yeast)	nucleus
UTP20	UTP20, small subunit (SSU) processome component, homolog (yeast)	nucleus
VCP	valosin-containing protein	nucleus
WDR36	WD repeat domain 36	nucleus
WDR43	WD repeat domain 43	nucleus
WDR5	WD repeat domain 5	nucleus
WDR55	WD repeat domain 55	nucleus
WDR74	WD repeat domain 74	nucleus
WDR82	WD repeat domain 82	nucleus
WHSC1	Wolf-Hirschhorn syndrome candidate 1	nucleus
WHSC2	Wolf-Hirschhorn syndrome candidate 2	nucleus
WIZ	widely interspaced zinc finger motifs	nucleus
XPO5	exportin 5	nucleus
XRN2	5'-3' exoribonuclease 2	nucleus
YARS	tyrosyl-tRNA synthetase	nucleus
YBX1	Y box binding protein 1	nucleus
YLPM1	YLP motif containing 1	nucleus
YWHAB	tyrosine 3-monooxygenase/tryptophan 5-monooxygenase activation protein, beta polypeptide	nucleus
YWHAZ	tyrosine 3-monooxygenase/tryptophan 5-monooxygenase activation protein, zeta polypeptide	nucleus
ZC3H11A	zinc finger CCCH-type containing 11A	nucleus
ZMYM4	zinc finger, MYM-type 4	nucleus
ZNF148	zinc finger protein 148	nucleus
ZNF187	zinc finger protein 187	nucleus
ZNF281	zinc finger protein 281	nucleus
ZNF512	zinc finger protein 512	nucleus
ZNF638	zinc finger protein 638	nucleus
FEN1	flap structure-specific endonuclease 1	nucleus
RPF2	ribosome production factor 2 homolog (S. cerevisiae)	nucleus
CSE1L	CSE1 chromosome segregation 1-like (yeast)	nucleus, cancer	x
NDRG1	N-myc downstream regulated 1	nucleus, cancer	x
NME1	non-metastatic cells 1, protein (NM23A) expressed in	nucleus, cancer	x
PPP2CB	protein phosphatase 2, catalytic subunit, beta isozyme	nucleus, cancer	x
RUNX2	runt-related transcription factor 2	nucleus, cancer	x
SRPK1	SRSF protein kinase 1	nucleus, cancer	x
WDR3	WD repeat domain 3	nucleus, cancer	x
CAPN2	calpain 2, (m/II) large subunit	nucleus, cell cycle	x
CCNH	cyclin H	nucleus, cell cycle	x
CDK2	cyclin-dependent kinase 2	nucleus, cell cycle	x
CHD4	chromodomain helicase DNA binding protein 4	nucleus, cell cycle	x
ERH	enhancer of rudimentary homolog (Drosophila)	nucleus, cell cycle	x
FAR1	fatty acyl CoA reductase 1	nucleus, cell cycle	x
KHDRBS1	KH domain containing, RNA binding, signal transduction associated 1	nucleus, cell cycle	x
MED29	mediator complex subunit 29	nucleus, cell cycle	x
NSA2	NSA2 ribosome biogenesis homolog (S. cerevisiae)	nucleus, cell cycle	x
PSMA8	proteasome (prosome, macropain) subunit, alpha type, 8	nucleus, cell cycle	x
VRK1	vaccinia related kinase 1	nucleus, cell cycle	x
BYSL	bystin-like	nucleus, cell prolif	x
PA2G4	proliferation-associated 2G4, 38kDa	nucleus, cell prolif	x
VIM	vimentin	nucleus, cell prolif	x
RACGAP1	Rac GTPase activating protein 1	nucleus, cytokinesis	x
DRG1	developmentally regulated GTP binding protein 1	nucleus, mitosis	x
NPM1	nucleophosmin (nucleolar phosphoprotein B23, numatrin)	nucleus, mitosis	x
RANBP2	RAN binding protein 2	nucleus, mitosis	x
PSMC4	proteasome (prosome, macropain) 26S subunit, ATPase, 4	proteasome
PSMD11	proteasome (prosome, macropain) 26S subunit, non-ATPase, 11	proteasome
PSMD14	proteasome (prosome, macropain) 26S subunit, non-ATPase, 14	proteasome
PSMD3	proteasome (prosome, macropain) 26S subunit, non-ATPase, 3	proteasome
PSMD6	proteasome (prosome, macropain) 26S subunit, non-ATPase, 6	proteasome
RPN1	ribophorin I	Proteasome
RPN2	ribophorin II	proteasome
UCHL5	ubiquitin carboxyl-terminal hydrolase L5	proteasome
ABCF1	ATP-binding cassette, sub-family F (GCN20), member 1	ribosome
DENR	density-regulated protein	ribosome
EIF1	eukaryotic translation initiation factor 1	ribosome
EIF1B	eukaryotic translation initiation factor 1B	ribosome
EIF2S3	eukaryotic translation initiation factor 2, subunit 3 gamma, 52kDa	ribosome
EIF4A1	eukaryotic translation initiation factor 4A1	ribosome
EIF4A2	eukaryotic translation initiation factor 4A2	ribosome
Gm4180		ribosome
HEATR1	HEAT repeat containing 1	ribosome
LOC683646		ribosome
LOC683961		ribosome
MRPL10	mitochondrial ribosomal protein L10	ribosome
MRPL12	mitochondrial ribosomal protein L12	ribosome
NUFIP2	nuclear fragile X mental retardation protein interacting protein 2	ribosome
PRMT3	protein arginine methyltransferase 3	ribosome
RGD1564883		ribosome
RPL10	ribosomal protein L10	ribosome
RPL10A	ribosomal protein L10a	ribosome
RPL13	ribosomal protein L13	ribosome
RPL14	ribosomal protein L14	ribosome
RPL17	ribosomal protein L17	ribosome
RPL18	ribosomal protein L18	ribosome
RPL19	ribosomal protein L19	ribosome
RPL22	ribosomal protein L22	ribosome
RPL23	ribosomal protein L23	ribosome
RPL23A	ribosomal protein L23a	ribosome
RPL24	ribosomal protein L24	ribosome
RPL27	ribosomal protein L27	ribosome
RPL3	ribosomal protein L3	ribosome
RPL30	ribosomal protein L30	ribosome
RPL32	ribosomal protein L32	ribosome
RPL38	ribosomal protein L38	ribosome
RPL4	ribosomal protein L4	ribosome
RPL5	ribosomal protein L5	ribosome
RPL6	ribosomal protein L6	ribosome
RPL7	ribosomal protein L7	ribosome
RPL7A	ribosomal protein L7a	ribosome
RPL7L1	ribosomal protein L7-like 1	ribosome
RPL8	ribosomal protein L8	ribosome
RPL9	ribosomal protein L9	ribosome
RPLP0	ribosomal protein, large, P0	ribosome
RPLP1	ribosomal protein, large, P1	ribosome
RPLP2	ribosomal protein, large, P2	ribosome
RPS11	ribosomal protein S11	ribosome
RPS14	ribosomal protein S14	ribosome
RPS15	ribosomal protein S15	ribosome
RPS17	ribosomal protein S17	ribosome
RPS2	ribosomal protein S2	ribosome
RPS23	ribosomal protein S23	ribosome
RPS24	ribosomal protein S24	ribosome
RPS27A;UBB;UBC	ribosomal protein S27a;ubiquitin B;ubiquitin C	ribosome
RPS3	ribosomal protein S3	ribosome
RPS3A	ribosomal protein S3A	ribosome
RPS4X	ribosomal protein S4, X-linked	ribosome
RPS5	ribosomal protein S5	ribosome
RPS6	ribosomal protein S6	ribosome
RPS7	ribosomal protein S7	ribosome
RPSA	ribosomal protein SA	ribosome
RSL1D1	ribosomal L1 domain containing 1	ribosome
UBE2N	ubiquitin-conjugating enzyme E2N (UBC13 homolog, yeast)	ribosome
APEX1	APEX nuclease (multifunctional DNA repair enzyme) 1	ribosome, cancer	x
ANXA11	annexin A11	spindle
CSNK2A2	casein kinase 2, alpha prime polypeptide	spindle
INO80E	INO80 complex subunit E	spindle
RIF1	RAP1 interacting factor homolog (yeast)	spindle
SEPT6	septin 6	spindle
SEPT7	septin 7	spindle	x
SEPT9	septin 9	spindle
TTLL12	tubulin tyrosine ligase-like family, member 12	spindle
NUP98	nucleoporin 98kDa	spindle, cancer	x
ARHGEF2	Rho/Rac guanine nucleotide exchange factor (GEF) 2	spindle, cell cycle	x
BIRC5	baculoviral IAP repeat-containing 5	spindle, cell cycle	x
CDCA8	cell division cycle associated 8	spindle, cell cycle	x
KIF11	kinesin family member 11	spindle, cell cycle	x
KIF15	kinesin family member 15	spindle, cell cycle	x
MAPRE1	microtubule-associated protein, RP/EB family, member 1	spindle, cell cycle	x
RCC2	regulator of chromosome condensation 2	spindle, cell cycle	x
CSNK2B	casein kinase 2, beta polypeptide	spindle, centrosomes, cell prolif	x
NUMA1	nuclear mitotic apparatus protein 1	spindle, mitosis	x
HSP90AA1	heat shock protein 90kDa alpha (cytosolic), class A member 1	vesicle
HSPA8	heat shock 70kDa protein 8	vesicle
PPIB	peptidylprolyl isomerase B (cyclophilin B)	vesicle
RAB7A	RAB7A, member RAS oncogene family	vesicle
LRPAP1	low density lipoprotein receptor-related protein associated protein 1	vesicle, cancer	x
ATAD1	ATPase family, AAA domain containing 1	unknown-No GO terms Ided
ATIC	5-aminoimidazole-4-carboxamide ribonucleotide formyltransferase/IMP cyclohydrolase	unknown-No GO terms Ided
BCL7C	B-cell CLL/lymphoma 7C	unknown-No GO terms Ided
BZW2	basic leucine zipper and W2 domains 2	unknown-No GO terms Ided
C14orf43	chromosome 14 open reading frame 43	unknown-No GO terms Ided
C15orf44	chromosome 15 open reading frame 44	unknown-No GO terms Ided
C1orf25	chromosome 1 open reading frame 25	unknown-No GO terms Ided
C7orf26	chromosome 7 open reading frame 26	unknown-No GO terms Ided
CDK2AP1	cyclin-dependent kinase 2 associated protein 1	unknown-No GO terms Ided
COBLL1	COBL-like 1	unknown-No GO terms Ided
COX6B1	cytochrome c oxidase subunit VIb polypeptide 1 (ubiquitous)	unknown-No GO terms Ided
DCAF13	DDB1 and CUL4 associated factor 13	unknown-No GO terms Ided
DHX37	DEAH (Asp-Glu-Ala-His) box polypeptide 37	unknown-No GO terms Ided
FAM98B	family with sequence similarity 98, member B	unknown-No GO terms Ided
FANCI	Fanconi anemia, complementation group I	unknown-No GO terms Ided
GAPDHS	glyceraldehyde-3-phosphate dehydrogenase, spermatogenic	unknown-No GO terms Ided
Gm3346		unknown-No GO terms Ided
HEATR3	HEAT repeat containing 3	unknown-No GO terms Ided
LRRC47	leucine rich repeat containing 47	unknown-No GO terms Ided
Mcpt9		unknown-No GO terms Ided
NT5DC2	5'-nucleotidase domain containing 2	unknown-No GO terms Ided
PABPC4	poly(A) binding protein, cytoplasmic 4 (inducible form)	unknown-No GO terms Ided
PAICS	phosphoribosylaminoimidazole carboxylase, phosphoribosylaminoimidazole succinocarboxamide synthetase	unknown-No GO terms Ided
PDXDC1	pyridoxal-dependent decarboxylase domain containing 1	unknown-No GO terms Ided
PHF14	PHD finger protein 14	unknown-No GO terms Ided
PPAT	phosphoribosyl pyrophosphate amidotransferase	unknown-No GO terms Ided
PPP2R1B	protein phosphatase 2, regulatory subunit A, beta	unknown-No GO terms Ided
PRPS2	phosphoribosyl pyrophosphate synthetase 2	unknown-No GO terms Ided
RASAL2	RAS protein activator like 2	unknown-No GO terms Ided
C4orf27	chromosome 4 open reading frame 27	unknown-No GO terms Ided
RGPD6;RGPD5	RANBP2-like and GRIP domain containing 5;RANBP2-like and GRIP domain containing 6	unknown-No GO terms Ided
RPRD1B	regulation of nuclear pre-mRNA domain containing 1B	unknown-No GO terms Ided
RPRD2	regulation of nuclear pre-mRNA domain containing 2	unknown-No GO terms Ided
RPS12	ribosomal protein S12	unknown-No GO terms Ided
SBNO1	strawberry notch homolog 1 (Drosophila)	unknown-No GO terms Ided
SPATA5L1	spermatogenesis associated 5-like 1	unknown-No GO terms Ided
SPECC1L	sperm antigen with calponin homology and coiled-coil domains 1-like	unknown-No GO terms Ided
THOC6	THO complex 6 homolog (Drosophila)	unknown-No GO terms Ided
UBAP2L	ubiquitin associated protein 2-like	unknown-No GO terms Ided
ZMYND8	zinc finger, MYND-type containing 8	unknown-No GO terms Ided
ZNF800	zinc finger protein 800	unknown-No GO terms Ided
IPI00180730.1		unknown-No GO terms Ided
IPI00212167.5		unknown-No GO terms Ided
IPI00249267.2		unknown-No GO terms Ided
IPI00361815.3		unknown-No GO terms Ided
IPI00367441.3		unknown-No GO terms Ided
IPI00392830.3		unknown-No GO terms Ided
IPI00453476.2		unknown-No GO terms Ided
IPI00475530.4		unknown-No GO terms Ided
IPI00476722		unknown-No GO terms Ided
IPI00557114.2		unknown-No GO terms Ided
IPI00557715.2		unknown-No GO terms Ided
IPI00559057.2		unknown-No GO terms Ided
IPI00561918.2		unknown-No GO terms Ided
IPI00563746.1		unknown-No GO terms Ided
IPI00564052.2		unknown-No GO terms Ided
IPI00568454.2		unknown-No GO terms Ided
IPI00568873		unknown-No GO terms Ided
IPI00625893.3		unknown-No GO terms Ided
IPI00779086.2		unknown-No GO terms Ided
IPI00790743.1		unknown-No GO terms Ided
IPI00874964.3		unknown-No GO terms Ided
IPI00879148.1		unknown-No GO terms Ided
LOC100360342		unknown-No GO terms Ided
LOC100360604		unknown-No GO terms Ided
LOC100361060		unknown-No GO terms Ided
LOC303448		unknown-No GO terms Ided
LOC500912		unknown-No GO terms Ided
LOC684976		unknown-No GO terms Ided
LOC690728		unknown-No GO terms Ided
LOC691496		unknown-No GO terms Ided
RGD1560797		unknown-No GO terms Ided
RGD1561367		unknown-No GO terms Ided
RGD1565928		unknown-No GO terms Ided
