# Supplementary material for: Mitotic Spindle Proteomics in Chinese Hamster Ovary Cells
Source: PLoS One. 2011 May 27;6(5):e20489. doi: 10.1371/journal.pone.0020489 (PMC3103581; doi:10.1371/journal.pone.0020489)
Supplement: Table S3 — Comparative proteomics data of cell cycle proteomes. The comparison was performed using current unique HGNC symbols derived from updated accession numbers (see Methods). Using our updated lists, we found proteins in common between the CHO mitotic spindle and midbody [9], which are reported in column A. Unique proteins to the CHO mitotic spindle, when compared to the CHO midbody [9], are found in column B. Proteins that are found in both the CHO mitotic spindle and HeLa mitotic spindle proteomes [17] are reported in column D. Unique proteins to the CHO mitotic spindle, when compared to the HeLa mitotic spindle [17], are found in column E. (XLSX) [file pone.0020489.s003.xlsx]

## Sheet: Supporting Table S3
Bonner et al.
Comparative proteomics data for cell cycle proteomes
Supporting Information: Table S3
Supporting Table S3 contains comparisons of proteomes from the CHO mitotic spindle (this paper),
the CHO midbody (Skop et al. 2004), and the HeLa mitotic spindle (Sauer et al. 2005). The comparison was done
on current unique HGNC symbols derived from updated accession numbers, see Methods. Using our updated lists,
we found proteins in common between the CHO mitotic spindle and midbody proteomes, which are reported
are reported in column A (Skop et al. 2004). Proteins that are unique to this CHO mitotic spindle, when compared
to the CHO midbody proteome, are listed in column B (Skop et al. 2004). Proteins that are found in both the CHO
mitotic spindle and HeLa mitotic spindle proteomes are reported in column D (Sauer et al. 2005). Unique proteins to
the CHO mitotic spindle, when compared to the HeLa mitotic spindle, are found in column e (Sauer et al. 2005).
CHO Mitotic Spindle Versus CHO Midbody			CHO and HeLa Spindle Proteomes
(this study & Skop et al. 2004)			(this study & Sauer et al. 2005)
Shared Total=314	Unique CHO Total=841		Shared Total=375	Unique CHO Total=780
Shared	Unique to CHO spindle		Shared	Unique to CHO spindle
ABCE1	0610009D07Rik		AATF	0610009D07Rik
ACIN1	AARS		ABCD3	AARS
ACLY	AATF		ABCF2	ABCE1
ACO2	ABCD3		ACIN1	ABCF1
ACOT7	ABCF1		ACO2	ABHD12
ACOX1	ABCF2		ACSL4	ACAA1
ACTL6A	ABHD12		ACTN1	ACAA2
ACTR2	ACAA1		ACTR1A	ACLY
ACTR3	ACAA2		AHCTF1	ACOT7
AGPS	ACSL4		AHNAK	ACOX1
AHSG	ACTBL2		AHSG	ACTBL2
ALDOA	ACTN1		AIFM1	ACTL6A
ANXA5	ACTR1A		ANLN	ACTR2
AP2M1	ADNP		ANXA2	ACTR3
APEX1	ADSS		AP1B1	ADNP
ARHGAP17	AHCTF1		AP2A1	ADSS
ARL1	AHNAK		AP2B1	AGPS
ARPC2	AIFM1		ARHGEF2	ALDOA
ATP5A1	ALDOC		ATAD1	ALDOC
ATP5B	ALG5		ATAD3A	ALG5
ATP5C1	ANAPC4		ATP1A1	ANAPC4
AURKA	ANLN		ATP5A1	ANP32E
BANF1	ANP32E		ATP5B	ANXA1
BUB3	ANXA1		AURKA	ANXA11
CACYBP	ANXA11		BAZ1B	ANXA5
CANX	ANXA2		BCLAF1	AP2M1
CAPZB	AP1B1		BIRC5	AP3D1
CAT	AP2A1		BMS1	AP3M1
CCT2	AP2B1		BOP1	APEX1
CCT3	AP3D1		BRIX1	API5
CCT4	AP3M1		BUB3	AQR
CCT5	API5		BUD31	ARF6
CCT6A	AQR		BYSL	ARHGAP1
CCT8	ARF6		C1orf77	ARHGAP17
CDC42	ARHGAP1		C22orf28	ARID1A
CFL1	ARHGEF2		CANX	ARID2
CKAP5	ARID1A		CCDC47	ARL1
CLTC	ARID2		CCT2	ARPC2
COPB1	ASH2L		CCT3	ASH2L
CORO1C	ATAD1		CCT4	ATIC
COX6B1	ATAD3A		CCT6A	ATP5C1
CPSF2	ATIC		CCT7	AURKC
CSE1L	ATP1A1		CCT8	BAG6
CSNK2B	AURKC		CDC5L	BAIAP2
CTNND1	BAG6		CDC73	BANF1
CUL1	BAIAP2		CDCA8	BAT1
CYB5B	BAT1		CDYL	BAZ1A
CYB5R3	BAZ1A		CEBPZ	BCAS2
CYCS	BAZ1B		CENPE	BCKDK
DBN1	BCAS2		CIRH1A	BCL7C
DDX17	BCKDK		CKAP4	BRD2
DDX21	BCL7C		CKAP5	BRD4
DDX5	BCLAF1		CLASP1	BRE
DDX6	BIRC5		CLTC	BRPF1
DEK	BMS1		COPG2	BZW2
DHX15	BOP1		CSE1L	C10orf2
DIAPH1	BRD2		CUL4A	C14orf166
DLAT	BRD4		DARS	C14orf43
DLST	BRE		DCAF13	C14orf49
DNAJC11	BRIX1		DDB1	C15orf44
DNM1L	BRPF1		DDX1	C17orf81
DNMT1	BUD31		DDX10	C19orf29
DYNC1H1	BYSL		DDX17	C1orf107
EEF1A1	BZW2		DDX18	C1orf25
EEF2	C10orf2		DDX21	C1QBP
EFTUD2	C14orf166		DDX24	C3
EHD1	C14orf43		DDX27	C4-2
EIF3A	C14orf49		DDX3X	C7orf26
EIF3E	C15orf44		DDX5	CACYBP
EIF3F	C17orf81		DDX51	CAP1
EIF5A	C19orf29		DDX56	CAPN2
ENO1	C1orf107		DHX15	CAPNS1
EPB41L2	C1orf25		DHX30	CAPRIN1
ERH	C1orf77		DHX9	CAPZA1
ESYT1	C1QBP		DNAJA1	CAPZB
EXOC1	C22orf28		DNAJB6	CARM1
EZR	C3		DNAJC11	CARS
FASN	C4-2		DYNC1LI2	CASK
FGG	C7orf26		DYNLL1	CAT
FH	CAP1		EBNA1BP2	CBFB
FKBP4	CAPN2		EEF1A1	CBX3
FLNB	CAPNS1		EEF2	CCAR1
FXR1	CAPRIN1		EFTUD2	CCNB1
GALNT2	CAPZA1		EIF3E	CCNH
GAPDH	CARM1		EIF4A1	CCT5
GAPDHS	CARS		EIF4G1	CDC37
GART	CASK		EPRS	CDC40
GCN1L1	CBFB		ERLIN2	CDC42
GDI2	CBX3		ESF1	CDK12
GFM1	CCAR1		EWSR1	CDK2
GLUD1	CCDC47		FANCI	CDK2AP1
GNB2	CCNB1		FBL	CEBPB
GNB2L1	CCNH		FEN1	CELF1
GSTM5	CCT7		FLNA	CETN2
GTF2I	CDC37		FLYWCH1	CFL1
H2AFX	CDC40		FTSJ3	CHCHD6
HADHA	CDC5L		FUS	CHD1
HADHB	CDC73		GAPDH	CHD4
HBA1;HBA2	CDCA8		GCN1L1	CHD5
HDAC1	CDK12		GEMIN4	CHD8
HK2	CDK2		GLUD1	CHERP
HMGB2	CDK2AP1		GLYR1	CIRBP
HMOX1	CDYL		GNB2L1	CISD2
HNRNPL	CEBPB		GNL3	CLIC1
HSP90AA1	CEBPZ		GNL3L	CLK3
HSP90B1	CELF1		GSN	CMAS
HSPA5	CENPE		GTPBP4	CNOT1
HSPA8	CETN2		H2AFY	COBLL1
HSPD1	CHCHD6		HACL1	COMT
HSPG2	CHD1		HADHA	COPB1
HYOU1	CHD4		HDAC2	COPB2
IMPDH2	CHD5		HEATR1	COPS3
IQGAP1	CHD8		HNRNPA2B1	CORO1C
KIF11	CHERP		HNRNPF	COX15
KIF20A	CIRBP		HNRNPK	COX4NB
KIF23	CIRH1A		HNRNPL	COX6B1
KIF2C	CISD2		HNRNPM	CPNE3
KIFC1	CKAP4		HNRNPR	CPSF2
KRT1	CLASP1		HNRNPU	CPSF3
LGALS1	CLIC1		HP1BP3	CPSF6
LMNA	CLK3		HSP90AA1	CPSF7
LMNB1	CMAS		HSP90B1	CSNK2A1
LONP1	CNOT1		HSPA5	CSNK2A2
LRRC59	COBLL1		HSPA8	CSNK2B
MAP1B	COMT		HSPD1	CSTF2
MAPRE1	COPB2		IARS	CSTF3
MATR3	COPG2		ILF2	CTBP1
MCM5	COPS3		IMP4	CTBP2
MCM6	COX15		IMPDH2	CTCF
MCM7	COX4NB		INCENP	CTDNEP1
MDH2	CPNE3		INTS3	CTNND1
MORF4L2	CPSF3		INTS5	CTR9
MRPL12	CPSF6		IPO5	CTSB
MSN	CPSF7		IPO7	CUL1
MTHFD1L	CSNK2A1		ITPR3	CWC15
MTHFD2	CSNK2A2		KHDRBS1	CYB5B
MYBBP1A	CSTF2		KIAA0020	CYB5R1
MYH9	CSTF3		KIF11	CYB5R3
MYL6	CTBP1		KIF15	CYC1
MYO1C	CTBP2		KIF20A	CYCS
MYO1E	CTCF		KIF20B	DAZAP1
MYOF	CTDNEP1		KIF22	DBN1
NACA	CTR9		KIF23	DCAKD
NAP1L1	CTSB		KIF2C	DDOST
NCL	CUL4A		KIFC1	DDX19A
NDUFS3	CWC15		KPNA1	DDX23
NEDD4	CYB5R1		KPNA2	DDX46
NFKB2	CYC1		KPNA6	DDX47
NHP2L1	DARS		KRR1	DDX50
NIP7	DAZAP1		KRT1	DDX6
NME1	DCAF13		KRT9	DEK
NOLC1	DCAKD		LAS1L	DENR
NONO	DDB1		LMNA	DHX37
NOP2	DDOST		LMNB1	DHX8
NOP56	DDX1		LMNB2	DIAPH1
NOP58	DDX10		LONP1	DIMT1L
NPM1	DDX18		LRPPRC	DIS3
NSF	DDX19A		LRRC59	DLAT
NUDC	DDX23		MAD1L1	DLST
NUP133	DDX24		MAK16	DNAJC13
NUP153	DDX27		MAP4	DNAJC3
NUP37	DDX3X		MATR3	DNAJC8
NUP62	DDX46		MCM5	DNM1L
NUP93	DDX47		MDN1	DNMT1
NUP98	DDX50		MGST3	DNMT3A
NUPL1	DDX51		MKI67IP	DNTTIP1
OLA1	DDX56		MPHOSPH10	DOCK5
PA2G4	DENR		MRTO4	DPF2
PABPC1	DHX30		MSH2	DRG1
PCBP1	DHX37		MSN	DYNC1H1
PDHB	DHX8		MTCH2	DYNC1LI1
PDIA3	DHX9		MTOR	DYNLT1
PFN1	DIMT1L		MYBBP1A	ECHS1
PGK1	DIS3		MYH9	EDC4
PHB	DNAJA1		MYL12A	EEF1B2
PHGDH	DNAJB6		MYO1C	EEF1D
PICALM	DNAJC13		NAP1L1	EEF1G
PKM2	DNAJC3		NAP1L4	EEF1G;TUT1
PLEC	DNAJC8		NAT10	EFTUD1
PLG	DNMT3A		NCAPD2	EHD1
PLK1	DNTTIP1		NCAPG	EHD4
PNN	DOCK5		NCL	EHMT1
PPIA	DPF2		NDUFS3	EHMT2
PPP1CC	DRG1		NHP2L1	EIF1
PPP2R1B	DYNC1LI1		NOC2L	EIF1B
PRDX1	DYNC1LI2		NOC3L	EIF2S1
PRDX2	DYNLL1		NOC4L	EIF2S2
PRDX3	DYNLT1		NOL10	EIF2S3
PRPF19	EBNA1BP2		NOL6	EIF3A
PRPF31	ECHS1		NOL9	EIF3D
PRPS2	EDC4		NOMO1	EIF3F
PRSS1	EEF1B2		NONO	EIF3H
PTBP1	EEF1D		NOP2	EIF3K
PTGES3	EEF1G		NOP56	EIF3M
PTRH2	EEF1G;TUT1		NOP58	EIF4A2
RAB31	EFTUD1		NPM1	EIF5
RAB7A	EHD4		NSA2	EIF5A
RAN	EHMT1		NSF	EIF5B
RANBP2	EHMT2		NSUN2	EIF6
RBBP4	EIF1		NUMA1	ELAVL1
RBBP7	EIF1B		NUP107	ELP3
RBM10	EIF2S1		NUP133	EMG1
RBM14	EIF2S2		NUP153	ENO1
RBM25	EIF2S3		NUP155	ENY2
RBM39	EIF3D		NUP160	EP300
RCC2	EIF3H		NUP188	EPB41L2
RDX	EIF3K		NUP205	EPHA2
RPL10	EIF3M		NUP35	ERH
RPL10A	EIF4A1		NUP37	ESYT1
RPL13	EIF4A2		NUP43	ETF1
RPL14	EIF4G1		NUP85	EXOC1
RPL17	EIF5		NUP88	EXOSC2
RPL18	EIF5B		NUP93	EXOSC4
RPL19	EIF6		NUP98	EXOSC5
RPL22	ELAVL1		PA2G4	EZR
RPL23	ELP3		PABPC1	FAM129B
RPL23A	EMG1		PABPC4	FAM98B
RPL24	ENY2		PARP1	FAR1
RPL3	EP300		PCBP1	FARSB
RPL30	EPHA2		PCBP2	FASN
RPL32	EPRS		PDCD11	FBLN1
RPL38	ERLIN2		PDHB	FERMT2
RPL4	ESF1		PDIA3	FGG
RPL5	ETF1		PES1	FH
RPL7	EWSR1		PHB2	FIP1L1
RPL7A	EXOSC2		PHGDH	FKBP11
RPL8	EXOSC4		PKM2	FKBP3
RPL9	EXOSC5		PLEC	FKBP4
RPLP0	FAM129B		PLK1	FKBP8
RPLP1	FAM98B		PNN	FLNB
RPLP2	FANCI		PNPT1	FN1
RPN1	FAR1		PPAN	FNBP4
RPN2	FARSB		PPIB	FOSB
RPS11	FBL		PPP1CB	FOSL1
RPS12	FBLN1		PPP1CC	FOXK2
RPS14	FEN1		PPP1R10	FXR1
RPS15	FERMT2		PPP2R1A	GALK1
RPS17	FIP1L1		PPP2R1B	GALNT2
RPS2	FKBP11		PPP2R5D	GAPDHS
RPS23	FKBP3		PRC1	GAPVD1
RPS27A;UBB;UBC	FKBP8		PRPF19	GARS
RPS3	FLNA		PRPF3	GART
RPS3A	FLYWCH1		PRPF40A	GATAD1
RPS4X	FN1		PRPF6	GATAD2A
RPS5	FNBP4		PSMD3	GATAD2B
RPS6	FOSB		PSMD6	GDI2
RPS7	FOSL1		PWP1	GFM1
RPSA	FOXK2		PWP2	GLRX3
RSU1	FTSJ3		RAB1B	GLT25D1
RUVBL2	FUS		RACGAP1	Gm3346
S100A10	GALK1		RAE1	Gm4130
S100A11	GAPVD1		RALY	GMPS
SDHA	GARS		RAN	GNB1
SEC13	GATAD1		RANBP2	GNB2
SEC23B	GATAD2A		RANGAP1	GPC1
SEC31A	GATAD2B		RBM14	GPS1
SEPT2	GEMIN4		RBM25	GPX4
SEPT6	GLRX3		RBM28	GRK6
SERPINH1	GLT25D1		RBM39	GSK3B
SF1	GLYR1		RFC1	GSPT1
SF3A1	Gm3346		RFC3	GSTM5
SF3B1	Gm4130		RFC4	GSTP1
SF3B3	GMPS		RFC5	GTF2H1
SFPQ	GNB1		RNPS1	GTF2H4
SH3PXD2A	GNL3		RPF2	GTF2I
SHMT1	GNL3L		RPL10A	GTF3C2
SLC25A3	GPC1		RPL18	GTF3C4
SLC25A5	GPS1		RPL19	GTPBP1
SMARCE1	GPX4		RPL3	H1FX
SMC1A	GRK6		RPL5	H2AFX
SMU1	GSK3B		RPL6	H3F3A;H3F3B
SND1	GSN		RPL7	HABP2
SNRNP200	GSPT1		RPL7A	HADH
SNRNP40	GSTP1		RPL9	HADHB
SNRPA1	GTF2H1		RPLP0	Hars2l
SNRPD1	GTF2H4		RPN1	HBA1;HBA2
SOD2	GTF3C2		RPS12	HBE1
SPCS2	GTF3C4		RPS27A;UBB;UBC	HCFC1
SPTAN1	GTPBP1		RPS3	HDAC1
SPTBN1	GTPBP4		RPS3A	HEATR3
SRSF3	H1FX		RPS4X	HELLS
SRSF7	H2AFY		RPSA	HIST1H1D
SSRP1	H3F3A;H3F3B		RRP12	HIST1H2AA
ST13	HABP2		RRP1B	HIST1H2AE
STAU1	HACL1		RRP9	HIST1H2BN
SUCLG1	HADH		RRS1	HIST2H2AB
SUPT5H	Hars2l		RSL1D1	HIST2H2BF
TCP1	HBE1		RUVBL1	HIST2H3D;HIST2H3A;HIST2H3C
TF	HCFC1		SAFB	HK2
TFIP11	HDAC2		SART1	HMGA2
TKT	HEATR1		SDAD1	HMGB2
TLN1	HEATR3		SDHA	HMGCL
TMPO	HELLS		SEC13	HMOX1
TOMM70A	HIST1H1D		SEH1L	HNRNPA0
TOP2A	HIST1H2AA		SEPT2	HNRNPA3
TOP2B	HIST1H2AE		SEPT9	HNRNPAB
TOR1B	HIST1H2BN		SF3B3	HNRNPD
TPR	HIST2H2AB		SFPQ	HNRNPH1
TRIM28	HIST2H2BF		SKIV2L2	HNRNPH2
TUBB2C	HIST2H3D;HIST2H3A;HIST2H3C		SLC25A13	HNRNPH3
TUFM	HMGA2		SLC25A5	HNRPDL
TXNRD1	HMGCL		SLTM	HNRPLL
U2AF2	HNRNPA0		SMARCA5	HPX
UGDH	HNRNPA2B1		SMC1A	HSD17B12
UPF1	HNRNPA3		SMC2	HSPA14
UQCRC1	HNRNPAB		SMC3	HSPG2
VAPA	HNRNPD		SMC4	HUWE1
VCL	HNRNPF		SMPD4	HYOU1
VDAC1	HNRNPH1		SND1	IDH2
VDAC2	HNRNPH2		SNRNP200	IDH3B
VDAC3	HNRNPH3		SNRNP70	IKBKAP
VIM	HNRNPK		SNRPB	ILF3
VPS35	HNRNPM		SON	ILK
YWHAE	HNRNPR		SPTAN1	INF2
	HNRNPU		SPTBN1	INO80E
	HNRPDL		SRP72	INS;INS-IGF2
	HNRPLL		SRPK1	INTS1
	HP1BP3		SRPRB	INTS10
	HPX		SRRM2	INTS4
	HSD17B12		SSR3	INTS7
	HSPA14		SSRP1	INTS9
	HUWE1		STT3A	IPI00180730.1
	IARS		SUPT16H	IPI00212167.5
	IDH2		SUPV3L1	IPI00249267.2
	IDH3B		TARS	IPI00361815.3
	IKBKAP		TBL3	IPI00367441.3
	ILF2		TCERG1	IPI00392830.3
	ILF3		TCP1	IPI00453476.2
	ILK		TEX10	IPI00475530.4
	IMP4		TFRC	IPI00476722
	INCENP		THOC2	IPI00557114.2
	INF2		THOC6	IPI00557715.2
	INO80E		TMPO	IPI00559057.2
	INS;INS-IGF2		TNPO1	IPI00561918.2
	INTS1		TOP1	IPI00563746.1
	INTS10		TOP2A	IPI00564052.2
	INTS3		TOP2B	IPI00568454.2
	INTS4		TPR	IPI00568873
	INTS5		TPX2	IPI00625893.3
	INTS7		TRRAP	IPI00779086.2
	INTS9		TUBA1A	IPI00790743.1
	IPI00180730.1		TUBA1C	IPI00850173.1
	IPI00212167.5		TUBB	IPI00874964.3
	IPI00249267.2		TUBB2C	IPI00879148.1
	IPI00361815.3		TUBB3	IPO9
	IPI00367441.3		TUBB6	IQGAP1
	IPI00392830.3		TUBG1	IQGAP2
	IPI00453476.2		TUFM	IRF2BP2
	IPI00475530.4		U2AF2	ITCH
	IPI00476722		UBA1	JUNB
	IPI00557114.2		UQCRC2	KARS
	IPI00557715.2		URB1	KAT2A
	IPI00559057.2		URB2	KCNAB2
	IPI00561918.2		USP36	KDM1A
	IPI00563746.1		USP39	KIAA0090
	IPI00564052.2		USP7	KRT16
	IPI00568454.2		UTP14A	KRT2
	IPI00568873		UTP15	LAMA5
	IPI00625893.3		UTP18	LBR
	IPI00779086.2		UTP20	LEMD3
	IPI00790743.1		VDAC1	LETM1
	IPI00850173.1		VDAC2	LGALS1
	IPI00874964.3		VDAC3	LGTN
	IPI00879148.1		VIM	LIG1
	IPO5		VTN	LOC100360342
	IPO7		WDR3	LOC100360604
	IPO9		WDR36	LOC100361060
	IQGAP2		WDR43	LOC300303
	IRF2BP2		WDR5	LOC303448
	ITCH		WDR74	LOC500912
	ITPR3		XPO5	LOC680063
	JUNB		XRN2	LOC683646
	KARS		YWHAZ	LOC683961
	KAT2A		ZC3H11A	LOC684681
	KCNAB2		ZNF638	LOC684976
	KDM1A			LOC690728
	KHDRBS1			LOC691496
	KIAA0020			LPL
	KIAA0090			LRPAP1
	KIF15			LRRC47
	KIF20B			LSM4
	KIF22			LUC7L
	KPNA1			LUC7L2
	KPNA2			LUC7L3
	KPNA6			LYPLA2
	KRR1			MAGOHB
	KRT16			MAP1B
	KRT2			MAP1S
	KRT9			MAP4K4
	LAMA5			MAPRE1
	LAS1L			MARCH5
	LBR			MAZ
	LEMD3			MBD2
	LETM1			MCM2
	LGTN			MCM4
	LIG1			MCM6
	LMNB2			MCM7
	LOC100360342			Mcpt9
	LOC100360604			MCTS1
	LOC100361060			MDC1
	LOC300303			MDH2
	LOC303448			ME2
	LOC500912			MED12
	LOC680063			MED21
	LOC683646			MED29
	LOC683961			MGST1
	LOC684681			MLL
	LOC684976			MOCS3
	LOC690728			MORF4L1
	LOC691496			MORF4L2
	LPL			MPHOSPH8
	LRPAP1			MRE11A
	LRPPRC			MRPL10
	LRRC47			MRPL12
	LSM4			MTA1
	LUC7L			MTAP
	LUC7L2			MTHFD1
	LUC7L3			MTHFD1L
	LYPLA2			MTHFD2
	MAD1L1			MTX1
	MAGOHB			MYL6
	MAK16			MYO1E
	MAP1S			MYOF
	MAP4			MYST2
	MAP4K4			NAA11
	MARCH5			NAA15
	MAZ			NAA25
	MBD2			NAA38
	MCM2			NAA50
	MCM4			NACA
	Mcpt9			NASP
	MCTS1			NCKAP1
	MDC1			NCOA5
	MDN1			NCOR2
	ME2			NDRG1
	MED12			NDUFA4
	MED21			NDUFA8
	MED29			NEDD4
	MGST1			NEK7
	MGST3			NFIB
	MKI67IP			NFIC
	MLL			NFKB2
	MOCS3			NHP2
	MORF4L1			NIP7
	MPHOSPH10			NIPBL
	MPHOSPH8			NME1
	MRE11A			NMT1
	MRPL10			NOB1
	MRTO4			NOL7
	MSH2			NOLC1
	MTA1			NOM1
	MTAP			NOP10
	MTCH2			NPLOC4
	MTHFD1			NPM3
	MTOR			NT5C2
	MTX1			NT5DC2
	MYL12A			NUDC
	MYST2			NUDT21
	NAA11			NUFIP2
	NAA15			NUP214
	NAA25			NUP62
	NAA38			NUPL1
	NAA50			NXF1
	NAP1L4			OGFR
	NASP			OGT
	NAT10			OLA1
	NCAPD2			ORC4
	NCAPG			PAF1
	NCKAP1			PAICS
	NCOA5			PARVB
	NCOR2			PCIF1
	NDRG1			PDCD6
	NDUFA4			PDCD6IP
	NDUFA8			PDHA1
	NEK7			PDLIM5
	NFIB			PDS5A
	NFIC			PDS5B
	NHP2			PDXDC1
	NIPBL			PFN1
	NMT1			PGD
	NOB1			PGK1
	NOC2L			PGRMC1
	NOC3L			PHB
	NOC4L			PHF12
	NOL10			PHF14
	NOL6			PHF6
	NOL7			PICALM
	NOL9			PIGU
	NOM1			PITRM1
	NOMO1			PKN3
	NOP10			PLG
	NPLOC4			PLRG1
	NPM3			POLR1A
	NSA2			POLR1B
	NSUN2			POLR1C
	NT5C2			POLR2A
	NT5DC2			POLR2B
	NUDT21			POLR2D
	NUFIP2			POLR2E
	NUMA1			POLR2G
	NUP107			POLR2J3
	NUP155			POM121
	NUP160			PPAT
	NUP188			PPIA
	NUP205			PPM1G
	NUP214			PPP2CB
	NUP35			PPP6R1
	NUP43			PQBP1
	NUP85			PRDX1
	NUP88			PRDX2
	NXF1			PRDX3
	OGFR			PRMT1
	OGT			PRMT3
	ORC4			PRMT5
	PABPC4			PRPF31
	PAF1			PRPF38A
	PAICS			PRPF38B
	PARP1			PRPF4B
	PARVB			PRPS2
	PCBP2			PRSS1
	PCIF1			PSIP1
	PDCD11			PSMA4
	PDCD6			PSMA5
	PDCD6IP			PSMA8
	PDHA1			PSMB1
	PDLIM5			PSMC1
	PDS5A			PSMC2
	PDS5B			PSMC4
	PDXDC1			PSMC5
	PES1			PSMD11
	PGD			PSMD14
	PGRMC1			PSME3
	PHB2			PTBP1
	PHF12			PTGES3
	PHF14			PTGS2
	PHF6			PTP4A1
	PIGU			PTRH2
	PITRM1			PUF60
	PKN3			PXK
	PLRG1			QKI
	PNPT1			RAB14
	POLR1A			RAB1A
	POLR1B			RAB31
	POLR1C			RAB7A
	POLR2A			RAB8A
	POLR2B			RAC1
	POLR2D			RAD23B
	POLR2E			RAD50
	POLR2G			RAI14
	POLR2J3			RASAL2
	POM121			RAVER1
	PPAN			RBBP4
	PPAT			RBBP7
	PPIB			RBM10
	PPM1G			RBM16
	PPP1CB			RBM22
	PPP1R10			RBM42
	PPP2CB			RBM8A
	PPP2R1A			RBPJ
	PPP2R5D			RCC1
	PPP6R1			RCC2
	PQBP1			RDX
	PRC1			RELA
	PRMT1			RGD1311747
	PRMT3			RGD1560797
	PRMT5			RGD1561367
	PRPF3			RGD1564688
	PRPF38A			RGD1564883
	PRPF38B			RGD1565928
	PRPF40A			RGPD5;RGPD6
	PRPF4B			RIF1
	PRPF6			RNASEH2A
	PSIP1			RNASEH2B
	PSMA4			RNF2
	PSMA5			RPA1
	PSMA8			RPL10
	PSMB1			RPL13
	PSMC1			RPL14
	PSMC2			RPL17
	PSMC4			RPL22
	PSMC5			RPL23
	PSMD11			RPL23A
	PSMD14			RPL24
	PSMD3			RPL27
	PSMD6			RPL30
	PSME3			RPL32
	PTGS2			RPL38
	PTP4A1			RPL4
	PUF60			RPL7L1
	PWP1			RPL8
	PWP2			RPLP1
	PXK			RPLP2
	QKI			RPN2
	RAB14			RPP14
	RAB1A			RPP30
	RAB1B			RPRD1B
	RAB8A			RPRD2
	RAC1			RPS11
	RACGAP1			RPS14
	RAD23B			RPS15
	RAD50			RPS17
	RAE1			RPS2
	RAI14			RPS23
	RALY			RPS24
	RANGAP1			RPS27
	RASAL2			RPS5
	RAVER1			RPS6
	RBM16			RPS6KA1
	RBM22			RPS7
	RBM28			RRBP1
	RBM42			RRP1
	RBM8A			RSU1
	RBPJ			RTN3
	RCC1			RUNX2
	RELA			RUVBL2
	RFC1			RYBP
	RFC3			S100A10
	RFC4			S100A11
	RFC5			SAP18
	RGD1311747			SAP30
	RGD1560797			SARNP
	RGD1561367			SARS
	RGD1564688			SBNO1
	RGD1564883			SCD
	RGD1565928			SCYL2
	RGPD5;RGPD6			SEC22B
	RIF1			SEC23A
	RNASEH2A			SEC23B
	RNASEH2B			SEC31A
	RNF2			SEC61A1
	RNPS1			SEPT11
	RPA1			SEPT6
	RPF2			SEPT7
	RPL27			SERPINF1
	RPL6			SERPINH1
	RPL7L1			SF1
	RPP14			SF3A1
	RPP30			SF3A2
	RPRD1B			SF3A3
	RPRD2			SF3B1
	RPS24			SF3B2
	RPS27			SH3PXD2A
	RPS6KA1			SH3PXD2B
	RRBP1			SHMT1
	RRP1			SHMT2
	RRP12			SKP1
	RRP1B			SLC25A12
	RRP9			SLC25A22
	RRS1			SLC25A3
	RSL1D1			SMAD4
	RTN3			SMARCC1
	RUNX2			SMARCC2
	RUVBL1			SMARCD1
	RYBP			SMARCD2
	SAFB			SMARCE1
	SAP18			SMCHD1
	SAP30			SMU1
	SARNP			SNRNP40
	SARS			SNRPA1
	SART1			SNRPD1
	SBNO1			SNRPD3
	SCD			SNRPF
	SCYL2			SNX2
	SDAD1			SNX6
	SEC22B			SOD2
	SEC23A			SPATA5L1
	SEC61A1			SPCS2
	SEH1L			SPCS3
	SEPT11			SPECC1L
	SEPT7			SRC
	SEPT9			SREK1
	SERPINF1			SRM
	SF3A2			SRP54
	SF3A3			SRPR
	SF3B2			SRRM1
	SH3PXD2B			SRSF10
	SHMT2			SRSF3
	SKIV2L2			SRSF7
	SKP1			SSB
	SLC25A12			SSR4
	SLC25A13			ST13
	SLC25A22			STAG1
	SLTM			STAT3
	SMAD4			STAU1
	SMARCA5			STIP1
	SMARCC1			STK10
	SMARCC2			STRAP
	SMARCD1			STT3B
	SMARCD2			SUCLG1
	SMC2			SUN1
	SMC3			SUN2
	SMC4			SUPT5H
	SMCHD1			SUPT6H
	SMPD4			SYMPK
	SNRNP70			SYNCRIP
	SNRPB			TAF1
	SNRPD3			TAF10
	SNRPF			TAF6
	SNX2			TAF6L
	SNX6			TAGLN2
	SON			TARDBP
	SPATA5L1			TCEB2
	SPCS3			TDP1
	SPECC1L			TECR
	SRC			TERF2
	SREK1			TF
	SRM			TFAP2A
	SRP54			TFIP11
	SRP72			THOC1
	SRPK1			THOC3
	SRPR			THOC4
	SRPRB			THOC5
	SRRM1			THOC7
	SRRM2			TIMM13
	SRSF10			TIMM17B
	SSB			TK1
	SSR3			TKT
	SSR4			TLN1
	STAG1			TM9SF2
	STAT3			TMED2
	STIP1			TMEM209
	STK10			TMEM48
	STRAP			TOMM34
	STT3A			TOMM70A
	STT3B			TOR1B
	SUN1			TRA2A
	SUN2			TRA2B
	SUPT16H			TRIM28
	SUPT6H			TRIP10
	SUPV3L1			TRIP12
	SYMPK			TRIP13
	SYNCRIP			TTLL12
	TAF1			TUBB2B
	TAF10			TUBB4
	TAF6			TXNL1
	TAF6L			TXNRD1
	TAGLN2			UBAP2L
	TARDBP			UBE2L3
	TARS			UBE2N
	TBL3			UBQLN4
	TCEB2			UBR4
	TCERG1			UBTF
	TDP1			UBXN4
	TECR			UCHL5
	TERF2			UGDH
	TEX10			UHRF1
	TFAP2A			UPF1
	TFRC			UQCRC1
	THOC1			UQCRQ
	THOC2			USP19
	THOC3			USP48
	THOC4			UXS1
	THOC5			VAPA
	THOC6			VARS
	THOC7			VAT1
	TIMM13			VCL
	TIMM17B			VCP
	TK1			VPS11
	TM9SF2			VPS16
	TMED2			VPS35
	TMEM209			VRK1
	TMEM48			WDR45
	TNPO1			WDR55
	TOMM34			WDR82
	TOP1			WHSC1
	TPX2			WHSC2
	TRA2A			WIZ
	TRA2B			YARS
	TRIP10			YARS2
	TRIP12			YBX1
	TRIP13			YLPM1
	TRRAP			YWHAB
	TTLL12			YWHAE
	TUBA1A			ZMYM4
	TUBA1C			ZMYND8
	TUBB			ZNF148
	TUBB2B			ZNF187
	TUBB3			ZNF281
	TUBB4			ZNF512
	TUBB6			ZNF800
	TUBG1
	TXNL1
	UBA1
	UBAP2L
	UBE2L3
	UBE2N
	UBQLN4
	UBR4
	UBTF
	UBXN4
	UCHL5
	UHRF1
	UQCRC2
	UQCRQ
	URB1
	URB2
	USP19
	USP36
	USP39
	USP48
	USP7
	UTP14A
	UTP15
	UTP18
	UTP20
	UXS1
	VARS
	VAT1
	VCP
	VPS11
	VPS16
	VRK1
	VTN
	WDR3
	WDR36
	WDR43
	WDR45
	WDR5
	WDR55
	WDR74
	WDR82
	WHSC1
	WHSC2
	WIZ
	XPO5
	XRN2
	YARS
	YARS2
	YBX1
	YLPM1
	YWHAB
	YWHAZ
	ZC3H11A
	ZMYM4
	ZMYND8
	ZNF148
	ZNF187
	ZNF281
	ZNF512
	ZNF638
	ZNF800
